# Supplementary material for: Photo-induced tandem cyclization of 3-iodoflavones with electron rich five-membered heteroarenes
Source: Royal Society of Chemistry journal article supplement (doi:10.1039/c7ra07793a), 2017-01-01
Supplement: c7ra07793a1.pdf [file c7ra07793a1.pdf]

# Photo-Induced Tandem Cyclizations of 3-Iodofalvones with Electron Rich Five-member Heteroarenes

Qian Yang<sup>a,b</sup>, Rui Wang<sup>a</sup>, Jie Han<sup>a</sup>, Chenchen Li<sup>a</sup>, Tao Wang,<sup>a</sup> Yong Liang,<sup>†</sup> Zunting Zhang<sup>a,\*</sup>

*<sup>a</sup>Key Laboratory of the Ministry of Education for Medicinal Resources and Natural Pharmaceutical Chemistry, National Engineering Laboratory for Resource Development of Endangered Crude Drugs in Northwest of China, and School of Chemistry and Chemical Engineering, Shaanxi Normal University, Xi'an 710062, People's Republic of China.*

*<sup>b</sup>School of Sciences, Xi'an University of Technology, Xi'an 710054, China.*

*E-mail: zhangzunting@sina.com; Fax: (+86)-29-81530727; Tel: (+86) -29-85303940.*

*<sup>†</sup>Department of Molecular Medicine, Beckman Research Institute, Hope Duarte, CA 91010*

## SUPPORTING INFORMATION

### Contents

|                                                                                          |   |
|------------------------------------------------------------------------------------------|---|
| 1. Spectroscopic Data of 1, 3, 5, 1aa and 1ab .....                                      | 2 |
| 2. References: .....                                                                     | 9 |
| 3. <sup>1</sup> H NMR <sup>13</sup> C NMR and HRMS Spectra of 1, 3, 5, 1aa and 1ab ..... | 9 |

## 1. Spectroscopic Data of 1, 3, 5, 1aa and 1ab

### 3-Iodo-2-(4-methoxyphenyl)-6-methyl-4H-chromen-4-one (1b) <sup>1</sup>

Yield: 76%. Characteristic: a white powder. m.p. 151.4-152.0. IR(KBr):3452, 2388, 1616, 1348, 1254, 1074, 1020, 937, 802. <sup>1</sup>H NMR (400 MHz, CDCl<sub>3</sub>) δ 8.04 (s, 1H), 7.81 – 7.79 (m, 1H), 7.79 – 7.77 (m, 1H), 7.51 (d, *J* = 2.1 Hz, 1H), 7.49 (d, *J* = 2.1 Hz, 1H), 7.37 (d, *J* = 8.5 Hz, 1H), 7.05 – 7.02 (m, 1H), 7.00 (d, *J* = 2.8 Hz, 1H), 3.90 (s, 3H), 2.47 (s, 3H); <sup>13</sup>C NMR (101 MHz, CDCl<sub>3</sub>) δ 174.8, 164.3, 161.7, 154.3, 135.9, 135.5, 131.5, 127.5, 126.1, 119.8, 117.43, 113.7, 87.6, 55.6, 21.1. HRMS (ESI): calc. for C<sub>17</sub>H<sub>13</sub>IO<sub>3</sub> [M + Na]<sup>+</sup> 414.9807, found 414.9801.

### 6-Fluoro-3-iodo-2-(4-methoxyphenyl)-4H-chromen-4-one (1d) <sup>1</sup>

Yield: 63%. Characteristic: a brown powder. m.p. 299.4-302.0. IR(KBr):3452, 2641, 2359, 1932, 1638, 1385, 1277, 1211, 1026, 854, 822, 698. <sup>1</sup>H NMR (400 MHz, CDCl<sub>3</sub>) δ 7.90 (d, *J* = 5.8 Hz, 1H), 7.79 (d, *J* = 8.3 Hz, 2H), 7.50 (dd, *J* = 8.5, 3.7 Hz, 1H), 7.42 (t, *J* = 6.7 Hz, 1H), 7.03 (d, *J* = 8.3 Hz, 2H), 3.90 (s, 3H); <sup>13</sup>C NMR (101 MHz, CDCl<sub>3</sub>) δ 174.1, 164.5, 161.8, 160.9, 158.5, 152.1, 131.4, 126.9, 122.5, 122.3, 121.0, 120.9, 119.8, 119.7, 113.6, 111.6, 111.4, 86.8, 55.6. HRMS (ESI) calc. for C<sub>16</sub>H<sub>10</sub>FIO<sub>3</sub> [M + Na]<sup>+</sup> 418.9556, found 418.9558.

### 3-Iodo-6-methyl-2-p-tolyl-4H-chromen-4-one (1f) <sup>1</sup>

Yield: 37%. Characteristic: a white powder. m.p. 179.1-180.2. IR(KBr):3740, 3450, 2356, 1643, 1567, 1453, 1330, 1226, 1057, 967, 824, 754. <sup>1</sup>H NMR (400 MHz, CDCl<sub>3</sub>) δ 8.05 (s, 1H), 7.69 (d, *J* = 8.2 Hz, 2H), 7.51 (dd, *J* = 8.6, 2.0 Hz, 1H), 7.37 (d, *J* = 8.6 Hz, 1H), 7.33 (d, *J* = 8.1 Hz, 2H), 2.48 (s, 3H), 2.46 (s, 3H); <sup>13</sup>C NMR (101 MHz, CDCl<sub>3</sub>) δ 174.7, 164.7, 154.3, 141.6, 135.9, 135.5, 132.5, 129.6, 129.0, 126.1, 119.8, 117.5, 88.0, 77.5, 77.2, 76.8, 21.7, 21.1. HRMS (ESI) calc. for C<sub>17</sub>H<sub>13</sub>IO<sub>2</sub> [M + Na]<sup>+</sup> 398.9852, found 398.9851.

### 3-Iodo-7-methoxy-2-p-tolyl-4H-chromen-4-one (1g) <sup>1</sup>

Yield: 33%. Characteristic: a white powder. m.p. 193.3-194.1. IR(KBr):2941, 2357, 1796, 1693, 1560, 1500, 1442, 1364, 1329, 1057, 976, 860, 824. <sup>1</sup>H NMR (400 MHz, CDCl<sub>3</sub>) δ 8.16 (d, *J* = 8.9 Hz, 1H), 7.68 (d, *J* = 8.1 Hz, 2H), 7.32 (d, *J* = 8.0 Hz, 2H), 6.99 (dd, *J* = 8.8, 2.3 Hz, 1H), 6.85 (d, *J* = 2.2 Hz, 1H), 3.89 (s, 3H), 2.45 (s, 3H); <sup>13</sup>C NMR (101 MHz, CDCl<sub>3</sub>) δ 173.8, 164.4, 164.2, 157.6, 141.4, 132.3, 129.4, 128.9, 128.1, 115.2, 113.9, 99.7, 88.3, 55.9, 21.6. HRMS (ESI) calc. for C<sub>17</sub>H<sub>13</sub>IO<sub>3</sub> [M + Na]<sup>+</sup> 414.9807, found 414.9809.

### 6-Fluoro-3-iodo-2-p-tolyl-4H-chromen-4-one (1h) <sup>1</sup>

Yield: 32%. Characteristic: a white powder. m.p. 192.4-193.4. IR(KBr):3740, 3506, 3074, 2918, 2357, 1649, 1557, 1474, 1319, 1180, 1089, 1049, 823, 756. <sup>1</sup>H NMR (400 MHz, CDCl<sub>3</sub>) δ 7.90 (dd, *J* = 8.1, 3.0 Hz, 1H), 7.69 (d, *J* = 8.1 Hz, 2H), 7.50 (dd, *J* = 9.1, 4.2 Hz, 1H), 7.45 – 7.39 (m, 1H), 7.34 (d, *J* = 8.0 Hz, 2H), 2.47 (s, 3H); <sup>13</sup>C NMR (101 MHz, CDCl<sub>3</sub>) δ 174.1, 174.1, 165.1, 161.14, 158.7, 152.3, 141.9, 132.1, 129.5, 129.1, 122.7, 122.4, 121.2, 121.1, 120.0, 119.9, 111.7, 111.5, 87.3, 21.74. HRMS (ESI) calc. for C<sub>16</sub>H<sub>10</sub>FIO<sub>2</sub> [M + Na]<sup>+</sup> 402.9602, found 402.9594.

### 2-(4-Fluorophenyl)-3-iodo-4H-chromen-4-one (1m) <sup>1</sup>

Yield: 16%. Characteristic: a white powder. m.p. 166.2-128.1. IR(KBr):3506,

3149, 2926, 2356, 1649, 1554, 1502, 1460, 1340, 1226, 1056, 912, 754, 682. <sup>1</sup>H NMR (400 MHz, CDCl<sub>3</sub>) δ 8.28 (dd, *J* = 8.0, 1.5 Hz, 1H), 7.84 – 7.79 (m, 2H), 7.75 – 7.69 (m, 1H), 7.47 (dd, *J* = 14.1, 7.6 Hz, 2H), 7.27 – 7.18 (m, 2H); <sup>13</sup>C NMR (101 MHz, CDCl<sub>3</sub>) δ 174.4, 165.3, 163.5, 162.8, 155.8, 134.3, 131.9, 131.8, 131.2, 131.1, 126.8, 125.9, 119.9, 117.6, 115.7, 115.4, 88.5. HRMS (ESI) calc. for C<sub>15</sub>H<sub>8</sub>FIO<sub>2</sub>[M + Na]<sup>+</sup> 388.9445, found 388.9450.

#### **2-(4-Fluorophenyl)-3-iodo-6-methyl-4H-chromen-4-one (1n)<sup>1</sup>**

Yield: 17%. Characteristic: a yellow powder. m.p. 175.7-176.3. IR(KBr):3494, 3051, 2924, 2356, 1643, 1508, 1330, 1226, 1145, 1060, 922, 826, 657. <sup>1</sup>H NMR (400 MHz, CDCl<sub>3</sub>) δ 8.05 (s), 7.84 – 7.76 (m, 1H), 7.53 (dd, *J* = 8.6, 2.0 Hz, 1H), 7.38 (d, *J* = 8.6 Hz, 1H), 7.24 – 7.18 (m, 1H), 2.48 (s, 3H); <sup>13</sup>C NMR (101 MHz, CDCl<sub>3</sub>) δ 174.6, 165.4, 163.5, 162.9, 154.3, 136.2, 135.7, 132.0, 131.9, 131.4, 131.4, 126.1, 119.8, 117.5, 115.7, 115.5, 88.5, 21.14. HRMS (ESI) calc. for C<sub>16</sub>H<sub>10</sub>FIO<sub>2</sub>[M + Na]<sup>+</sup> 402.9602, found 402.9596.

#### **2-(4-Fluorophenyl)-3-iodo-7-methoxy-4H-chromen-4-one (1o)<sup>1</sup>**

Yield: 14%. Characteristic: a white powder. m.p. 178.0-179.2. IR(KBr): 3740, 3505, 2989, 2356, 1628, 1506, 1433, 1332, 1244, 1056, 960, 837, 763. <sup>1</sup>H NMR (400 MHz, CDCl<sub>3</sub>) δ 8.17 (d, *J* = 9.0 Hz, 1H), 7.79 (dd, *J* = 8.7, 5.2 Hz, 2H), 7.21 (t, *J* = 8.6 Hz, 2H), 7.01 (dd, *J* = 8.9, 2.3 Hz, 1H), 6.86 (d, *J* = 2.2 Hz, 1H), 3.90 (s, 3H); <sup>13</sup>C NMR (101 MHz, CDCl<sub>3</sub>) δ 173.8, 165.4, 164.7, 163.1, 162.9, 157.7, 132.0, 131.9, 131.4, 131.3, 128.4, 115.8, 115.5, 115.5, 114.0, 99.8, 89.0, 56.1. HRMS (ESI) calc. for C<sub>16</sub>H<sub>10</sub>FIO<sub>3</sub>[M + Na]<sup>+</sup> 418.9551, found 418.9557.

#### **Ethyl 4-(3-iodo-4-oxo-4H-chromen-2-yl)benzoate (1p)<sup>1</sup>**

Yield: 8%. Characteristic: a white powder. m.p. 188.1-189.0. IR(KBr): 3740, 2920, 2356, 1719, 1658, 1610, 1462, 1276, 1107, 860, 756, 702. <sup>1</sup>H NMR (400 MHz, CDCl<sub>3</sub>) δ 8.29 (dd, *J* = 7.9, 1.4 Hz, 1H), 8.20 (d, *J* = 8.3 Hz, 2H), 7.85 (d, *J* = 8.3 Hz, 2H), 7.73 (ddd, *J* = 8.6, 7.3, 1.6 Hz, 1H), 7.52 – 7.45 (m, 2H), 4.44 (q, *J* = 7.1 Hz, 2H), 1.43 (t, *J* = 7.1 Hz, 3H); <sup>13</sup>C NMR (101 MHz, CDCl<sub>3</sub>) δ 174.3, 165.6, 163.5, 155.9, 138.9, 134.4, 132.6, 129.5, 129.5, 126.8, 126.05, 120.0, 117.2, 88.9, 61.46, 14.32. HRMS (ESI) calc. for C<sub>18</sub>H<sub>13</sub>IO<sub>4</sub>[M + Na]<sup>+</sup> 442.9751, found 442.9751.

#### **5-Methoxy-1-methylbenzo[e]chromeno[2,3-g]indol-13(1H)-one (3a)**

Yield: 47%. Characteristic: a yellow powder. m.p.150.6-152.0. IR(KBr): 3609, 2949, 2357, 1622, 1468, 1431, 1388, 1223, 1028, 943, 788, 760. <sup>1</sup>H NMR (400 MHz, CDCl<sub>3</sub>) δ 8.51 (d, *J* = 9.1 Hz, 1H), 8.34 (d, *J* = 7.9 Hz, 1H), 7.72 (t, *J* = 7.6 Hz, 1H), 7.62 (d, *J* = 8.3 Hz, 1H), 7.45 (d, *J* = 2.2 Hz, 1H), 7.42 (t, *J* = 7.5 Hz, 1H), 7.12 (dd, *J* = 11.2, 2.5 Hz, 2H), 6.94 (d, *J* = 2.9 Hz, 1H), 4.29 (s, 3H), 4.01 (s, 3H); <sup>13</sup>C NMR (101 MHz, CDCl<sub>3</sub>) δ 171.2, 156.4, 149.8, 148.4, 128.6, 125.6, 123.3, 121.5, 121.2, 119.2, 118.6, 116.7, 112.6, 110.7, 109.9, 104.2, 99.9, 97.9, 95.8, 50.6, 36.0. HRMS (ESI) calc. for C<sub>21</sub>H<sub>15</sub>NO<sub>3</sub>[M + Na]<sup>+</sup> 352.0944, found 352.0944.

#### **5-Methoxy-1,11-dimethylbenzo[e]chromeno[2,3-g]indol-13(1H)-one (3b)**

Yield: 40%. Characteristic: a yellow powder. m.p.151.4-152.0. IR(KBr): 3688, 3413, 3233, 3024, 2920, 1618, 1493, 1454, 1381, 1267, 1217, 1026, 941, 748, 814. <sup>1</sup>H NMR (400 MHz, CDCl<sub>3</sub>) δ 8.45 (d, *J* = 9.1 Hz, 1H), 8.09 (s, 1H), 7.51 – 7.45 (m, 2H), 7.41 (d, *J* = 2.3 Hz, 1H), 7.09 (dd, *J* = 9.1, 2.6 Hz, 2H), 6.91 (d, *J* = 3.0 Hz, 1H), 4.27

(s, 3H), 3.99 (s, 3H), 2.48 (s, 3H);  $^{13}\text{C}$  NMR (101 MHz,  $\text{CDCl}_3$ )  $\delta$  176.1, 161.2, 153.2, 152.9, 134.7, 133.8, 133.4, 130.3, 128.3, 126.0, 125.7, 123.1, 121.5, 117.2, 115.4, 114.9, 108.9, 102.8, 100.6, 55.54, 40.87, 21.08. HRMS (ESI) calc. for  $\text{C}_{22}\text{H}_{17}\text{NO}_3[\text{M} + \text{Na}]^+$  366.1101, found 366.1091.

**11-Fluoro-5-methoxy-1-methylbenzo[e]chromeno[2,3-g]indol-13(1H)-one (3c)**

Yield: 49%. Characteristic: a yellow powder. m.p.204.6-205.8. IR(KBr): 3742, 2926, 2357, 1680, 1622, 1487, 1382, 1217, 1084, 1018, 914, 813, 779.  $^1\text{H}$  NMR (400 MHz,  $\text{CDCl}_3$ )  $\delta$  8.37 (d,  $J = 9.1$  Hz, 1H), 7.91 (dd,  $J = 8.4, 2.7$  Hz, 1H), 7.52 (dd,  $J = 9.0, 4.1$  Hz, 1H), 7.40 (dd,  $J = 7.9, 2.3$  Hz, 1H), 7.37 (s, 1H), 7.06 (d,  $J = 3.2$  Hz, 2H), 6.88 (d,  $J = 2.7$  Hz, 1H), 4.24 (s, 3H), 3.98 (s, 3H);  $^{13}\text{C}$  NMR (101 MHz,  $\text{CDCl}_3$ )  $\delta$  174.9, 161.2, 160.1, 157.7, 153.1, 150.6, 133.4, 130.4, 127.6, 125.8, 124.2, 124.1, 121.6, 121.5, 121.2, 119.2, 119.1, 115.5, 114.4, 111.1, 110.9, 108.1, 102.6, 100.5, 55.4, 40.8. HRMS (ESI) calc. for  $\text{C}_{21}\text{H}_{14}\text{FNO}_3[\text{M} + \text{Na}]^+$  370.0850, found 370.0858.

**5,10-Dimethoxy-1-methylbenzo[e]chromeno[2,3-g]indol-13(1H)-one (3d)**

Yield: 38%. Characteristic: a yellow powder. m.p.206.1-207.4. IR(KBr): 3740, 2924, 2357, 1620, 1448, 1383, 1221, 1096, 1024, 918, 824, 737.  $^1\text{H}$  NMR (400 MHz,  $\text{CDCl}_3$ )  $\delta$  8.46 (d,  $J = 9.1$  Hz, 1H), 8.21 (d,  $J = 9.1$  Hz, 1H), 7.43 (d,  $J = 2.4$  Hz, 1H), 7.12 – 7.08 (m, 2H), 6.99 – 6.94 (m, 2H), 6.93 (d,  $J = 3.0$  Hz, 1H), 4.33 – 4.26 (m, 3H), 4.00 (s, 3H), 3.95 (s, 3H);  $^{13}\text{C}$  NMR (101 MHz,  $\text{CDCl}_3$ )  $\delta$  175.3, 164.0, 161.0, 156.2, 153.0, 133.0, 130.3, 128.2, 127.7, 125.7, 121.5, 117.2, 115.3, 114.7, 113.4, 108.9, 102.6, 100.4, 99.5, 55.79, 55.43, 40.85. HRMS (ESI) calc. for  $\text{C}_{22}\text{H}_{17}\text{NO}_4[\text{M} + \text{Na}]^+$  382.1050, found 382.1059.

**1,5-Dimethylbenzo[e]chromeno[2,3-g]indol-13(1H)-one (3e)**

Yield: 50%. Characteristic: a yellow powder. m.p.177.8-179.0. IR(KBr): 3740, 3603, 3161, 2922, 2357, 1645, 1471, 1373, 1200, 1037, 873, 806, 746.  $^1\text{H}$  NMR (400 MHz,  $\text{CDCl}_3$ )  $\delta$  8.47 (d,  $J = 8.5$  Hz, 1H), 8.34 (dd,  $J = 7.9, 1.6$  Hz, 1H), 7.93 (s, 1H), 7.75 – 7.70 (m, 1H), 7.63 (d,  $J = 8.3$  Hz, 1H), 7.42 (t,  $J = 7.2$  Hz, 1H), 7.32 (dd,  $J = 8.5, 1.4$  Hz, 1H), 7.11 (d,  $J = 3.0$  Hz, 1H), 6.97 (d,  $J = 3.0$  Hz, 1H), 4.29 (s, 3H), 2.58 (s, 3H);  $^{13}\text{C}$  NMR (101 MHz,  $\text{CDCl}_3$ )  $\delta$  176.1, 154.5, 152.9, 140.2, 133.4, 131.6, 130.4, 127.6, 126.3, 126.1, 123.9, 123.8, 123.4, 122.4, 121.7, 118.2, 117.4, 109.9, 100.5, 40.7, 22.1. HRMS (ESI) calc. for  $\text{C}_{21}\text{H}_{15}\text{NO}_2[\text{M} + \text{Na}]^+$  336.0995, found 336.1003.

**1,5,11-Trimethylbenzo[e]chromeno[2,3-g]indol-13(1H)-one (3f)**

Yield: 46%. Characteristic: a yellow powder. m.p. 179.1-180.2. IR(KBr): 3672, 3412, 3109, 3065, 2918, 2388, 1634, 1454, 1373, 1281, 918, 813, 737.  $^1\text{H}$  NMR (400 MHz,  $\text{CDCl}_3$ )  $\delta$  8.42 (d,  $J = 8.5$  Hz, 1H), 8.09 (s, 1H), 7.90 (s, 1H), 7.52 – 7.44 (m, 2H), 7.33 – 7.23 (m, 1H), 7.08 (d,  $J = 2.9$  Hz, 1H), 6.95 (d,  $J = 2.9$  Hz, 1H), 4.27 (s, 3H), 2.56 (s, 3H), 2.48 (s, 3H);  $^{13}\text{C}$  NMR (101 MHz,  $\text{CDCl}_3$ )  $\delta$  176.1, 152.9, 152.7, 140.0, 134.6, 133.7, 131.5, 130.3, 127.7, 126.0, 125.6, 123.8, 123.0, 122.3, 121.6, 118.3, 117.1, 109.8, 100.5, 40.73, 22.10, 20.94. HRMS (ESI) calc. for  $\text{C}_{22}\text{H}_{17}\text{NO}_2[\text{M} + \text{Na}]^+$  350.1151, found 350.1150.

**10-Methoxy-1,5-dimethylbenzo[e]chromeno[2,3-g]indol-13(1H)-one (3g)**

Yield: 42%. Characteristic: a white powder. m.p.198.2-199.8. IR(KBr): 3742, 3155, 2920, 2357, 1622, 1448, 1367, 1265, 1213, 1103, 1029, 912, 821, 742.  $^1\text{H}$  NMR

(400 MHz, CDCl<sub>3</sub>)  $\delta$  8.45 (d,  $J$  = 8.5 Hz, 1H), 8.23 (d,  $J$  = 8.8 Hz, 1H), 7.94 (s, 1H), 7.32 (dd,  $J$  = 8.5, 1.0 Hz, 1H), 7.11 (d,  $J$  = 3.0 Hz, 1H), 7.00 (d,  $J$  = 2.3 Hz, 1H), 6.97 (dd,  $J$  = 9.2, 2.6 Hz, 2H), 4.31 (s, 3H), 3.95 (s, 3H), 2.59 (s, 3H); <sup>13</sup>C NMR (101 MHz, CDCl<sub>3</sub>)  $\delta$  175.5, 164.1, 156.3, 152.8, 139.9, 131.3, 130.4, 127.8, 127.7, 126.0, 123.6, 122.3, 121.7, 118.2, 117.3, 113.4, 109.9, 100.4, 99.5, 55.78, 40.83, 22.09. HRMS (ESI) calc. for C<sub>22</sub>H<sub>17</sub>NO<sub>3</sub>[M + Na]<sup>+</sup> 366.1101, found 366.1104.

#### **11-Fluoro-1,5-dimethylbenzo[e]chromeno[2,3-g]indol-13(1H)-one (3h)**

Yield: 56%. Characteristic: a yellow powder. m.p.192.4-193.4. IR(KBr): 3682, 3328, 2952, 2388, 1706, 1643, 1490, 1369, 1303, 972, 815, 769. <sup>1</sup>H NMR (400 MHz, CDCl<sub>3</sub>)  $\delta$  8.36 (d,  $J$  = 8.5 Hz, 1H), 7.91 (dd,  $J$  = 8.4, 3.0 Hz, 1H), 7.88 (s, 1H), 7.54 (dd,  $J$  = 9.1, 4.2 Hz, 1H), 7.40 (ddd,  $J$  = 9.0, 7.9, 3.1 Hz, 1H), 7.28 (dd,  $J$  = 8.6, 0.8 Hz, 1H), 7.07 (d,  $J$  = 3.0 Hz, 1H), 6.93 (d,  $J$  = 3.0 Hz, 1H), 4.24 (s, 3H), 2.56 (s, 3H); <sup>13</sup>C NMR (101 MHz, CDCl<sub>3</sub>)  $\delta$  175.4, 160.4, 158.0, 153.2, 150.9, 140.6, 131.8, 130.8, 127.4, 126.3, 124.4, 124.4, 123.9, 122.6, 122.1, 121.8, 121.6, 119.5, 119.5, 118.2, 111.4, 111.1, 109.4, 100.8, 40.98, 22.35. HRMS (ESI) calc. for C<sub>21</sub>H<sub>14</sub>FNO<sub>2</sub>[M + Na]<sup>+</sup> 354.0901, found 354.0901.

#### **1-Methylbenzo[e]chromeno[2,3-g]indol-13(1H)-one (3i)**

Yield: 61%. Characteristic: a yellow powder. m.p.202.2-203.1. IR(KBr): 3742, 3524, 3200, 2943, 2357, 1649, 1558, 1468, 1373, 1331, 1273, 1049, 972, 789, 750. <sup>1</sup>H NMR (400 MHz, CDCl<sub>3</sub>)  $\delta$  8.61 (d,  $J$  = 8.3 Hz, 1H), 8.34 (dd,  $J$  = 7.9, 1.1 Hz, 1H), 8.17 (d,  $J$  = 8.2 Hz, 1H), 7.72 (ddd,  $J$  = 16.5, 11.9, 4.3 Hz, 2H), 7.65 (d,  $J$  = 8.3 Hz, 1H), 7.52 (t,  $J$  = 7.6 Hz, 1H), 7.42 (t,  $J$  = 7.4 Hz, 1H), 7.13 (d,  $J$  = 3.0 Hz, 1H), 7.01 (d,  $J$  = 3.0 Hz, 1H), 4.30 (s, 3H); <sup>13</sup>C NMR (101 MHz, CDCl<sub>3</sub>)  $\delta$  176.2, 154.6, 152.7, 133.6, 131.4, 130.7, 129.8, 127.4, 126.3, 124.1, 124.1, 123.9, 123.4, 122.9, 122.1, 120.2, 117.4, 110.6, 100.6, 40.78. HRMS (ESI) calc. for C<sub>20</sub>H<sub>13</sub>NO<sub>2</sub>[M + Na]<sup>+</sup> 322.0838, found 322.0846.

#### **1,11-Dimethylbenzo[e]chromeno[2,3-g]indol-13(1H)-one (3j)**

Yield: 51%. Characteristic: a yellow powder. m.p. 208.7-210.4. IR(KBr): 3686, 3517, 3442, 3329, 2388, 1643, 1489, 1373, 1280, 1047, 912, 815, 725. <sup>1</sup>H NMR (400 MHz, CDCl<sub>3</sub>)  $\delta$  8.61 (d,  $J$  = 8.4 Hz, 1H), 8.17 (d,  $J$  = 8.2 Hz, 1H), 8.11 (s, 1H), 7.69 (t,  $J$  = 7.4 Hz, 1H), 7.55 – 7.48 (m, 3H), 7.13 (d,  $J$  = 3.0 Hz, 1H), 7.01 (d,  $J$  = 2.9 Hz, 1H), 4.29 (s, 3H), 2.49 (s, 3H); <sup>13</sup>C NMR (101 MHz, CDCl<sub>3</sub>)  $\delta$  176.4, 153.0, 152.9, 135.0, 134.0, 131.5, 130.7, 129.8, 127.6, 125.8, 124.2, 124.1, 123.1, 123.0, 122.1, 120.5, 117.3, 110.6, 100.7, 40.88, 21.09. HRMS (ESI) calc. for C<sub>21</sub>H<sub>15</sub>NO<sub>2</sub>[M + Na]<sup>+</sup> 336.0995, found 336.0990.

#### **10-Methoxy-1-methylbenzo[e]chromeno[2,3-g]indol-13(1H)-one (3k)**

Yield: 45%. Characteristic: a grey powder. m.p.203.8-205.7. IR(KBr): 3742, 3614, 2922, 2357, 1620, 1445, 1368, 1271, 1150, 1093, 1022, 920, 820, 741. <sup>1</sup>H NMR (400 MHz, CDCl<sub>3</sub>)  $\delta$  8.61 (d,  $J$  = 8.3 Hz, 1H), 8.24 (d,  $J$  = 8.9 Hz, 1H), 8.20 (d,  $J$  = 8.2 Hz, 1H), 7.73 – 7.66 (m, 1H), 7.55 – 7.49 (m, 1H), 7.14 (d,  $J$  = 3.0 Hz, 1H), 7.14 (d,  $J$  = 3.0 Hz, 1H), 7.04 (d,  $J$  = 2.4 Hz, 1H), 7.03 (d,  $J$  = 3.0 Hz, 1H), 6.99 (dd,  $J$  = 8.8, 2.4 Hz, 1H), 4.32 (s, 3H), 3.97 (s, 3H); <sup>13</sup>C NMR (101 MHz, CDCl<sub>3</sub>)  $\delta$  175.6, 164.2, 156.4, 152.6, 131.0, 130.7, 129.5, 127.8, 127.6, 124.0, 123.7, 122.9, 122.1, 120.3, 117.3, 113.6, 110.6, 100.5, 99.6, 55.84, 40.87. HRMS (ESI) calc. for C<sub>21</sub>H<sub>15</sub>NO<sub>3</sub>[M +

Na]<sup>+</sup> 352.0944, found 352.0951.

**11-Fluoro-1-methylbenzo[e]chromeno[2,3-g]indol-13(1H)-one (3l)**

Yield: 66%. Characteristic: a yellow powder. m.p.198.4-201.7. IR(KBr): 3740, 2924, 2357, 1711, 1643, 1481, 1373, 1267, 1034, 914, 818, 733. <sup>1</sup>H NMR (400 MHz, CDCl<sub>3</sub>) δ 8.56 (d, *J* = 8.4 Hz, 1H), 8.16 (d, *J* = 8.2 Hz, 1H), 7.95 (dd, *J* = 8.4, 3.1 Hz, 1H), 7.73 – 7.67 (m, 1H), 7.61 (dd, *J* = 9.1, 4.1 Hz, 1H), 7.51 (t, *J* = 7.5 Hz, 1H), 7.44 (ddd, *J* = 9.1, 7.6, 3.1 Hz, 1H), 7.13 (d, *J* = 3.0 Hz, 1H), 7.00 (d, *J* = 3.0 Hz, 1H), 4.27 (s, 3H); <sup>13</sup>C NMR (101 MHz, CDCl<sub>3</sub>) δ 175.3, 160.2, 157.8, 152.8, 150.7, 131.5, 130.8, 130.0, 127.1, 124.2, 124.2, 123.9, 122.9, 122.2, 121.8, 121.6, 120.1, 119.4, 119.3, 111.2, 111.0, 109.9, 100.6, 40.77. HRMS (ESI) calc. for C<sub>20</sub>H<sub>12</sub>FNO<sub>2</sub>[M + Na]<sup>+</sup> 340.0744, found 340.0749.

**5-Fluoro-1-methylbenzo[e]chromeno[2,3-g]indol-13(1H)-one (3m)**

Yield: 68%. Characteristic: a yellow powder. m.p.226.8-228.1. IR(KBr):3740, 3523, 2959, 2357, 1649, 1470, 1377, 1323, 1261, 1186, 1084, 901, 806, 711. <sup>1</sup>H NMR (400 MHz, CDCl<sub>3</sub>) δ 8.63 (dd, *J* = 9.2, 5.7 Hz, 1H), 8.34 (dd, *J* = 7.9, 1.5 Hz, 1H), 7.77 (d, *J* = 2.1 Hz, 1H), 7.74 (dd, *J* = 5.4, 2.0 Hz, 1H), 7.65 (d, *J* = 8.3 Hz, 1H), 7.44 (t, *J* = 7.4 Hz, 1H), 7.29 – 7.22 (m, 2H) (containing the D of CDCl<sub>3</sub>), 7.13 (d, *J* = 3.0 Hz, 1H), 6.94 (d, *J* = 3.0 Hz, 1H), 4.29 (s, 3H); <sup>13</sup>C NMR (101 MHz, CDCl<sub>3</sub>) δ 176.1, 165.0, 162.5, 154.5, 152.6, 133.7, 133.2, 133.1, 130.8, 128.0, 127.0, 126.9, 126.4, 124.2, 123.35, 121.6, 121.5, 117.4, 117.0, 113.7, 113.5, 110.0, 107.5, 107.3, 100.8, 40.81. HRMS (ESI) calc. for C<sub>20</sub>H<sub>12</sub>FNO<sub>2</sub>[M + Na]<sup>+</sup> 340.0744, found 340.0750.

**5-Fluoro-1,11-dimethylbenzo[e]chromeno[2,3-g]indol-13(1H)-one (3n)**

Yield: 54%. Characteristic: a yellow powder. m.p.189.8-190.8. IR(KBr): 3447, 3242, 2390, 2361, 2124, 1643, 1492, 1441, 1331, 1182, 943, 806, 646. <sup>1</sup>H NMR (400 MHz, CDCl<sub>3</sub>) δ 8.62 (dd, *J* = 9.2, 5.7 Hz, 1H), 8.12 (s, 1H), 7.76 (dd, *J* = 9.9, 2.4 Hz, 1H), 7.59 – 7.49 (m, 2H), 7.25 (dt, *J* = 8.8, 3.7 Hz, 2H) (containing the D of CDCl<sub>3</sub>), 7.13 (d, *J* = 3.0 Hz, 1H), 6.93 (d, *J* = 3.0 Hz, 1H), 4.29 (s, 3H), 2.51 (s, 3H); <sup>13</sup>C NMR (101 MHz, CDCl<sub>3</sub>) δ 176.1, 165.0, 162.5, 152.8, 152.6, 152.6, 134.9, 134.1, 133.1, 133.0, 130.7, 128.1, 127.0, 126.9, 125.7, 123.0, 121.4, 117.1, 117.1, 113.6, 113.4, 109.9, 107.5, 107.3, 100.8, 40.78, 20.96. HRMS (ESI) calc. for C<sub>21</sub>H<sub>14</sub>FNO<sub>2</sub>[M + Na]<sup>+</sup> 354.0901, found 354.0893.

**5-Fluoro-10-methoxy-1-methylbenzo[e]chromeno[2,3-g]indol-13(1H)-one (3o)**

Yield: 49%. Characteristic: a white powder. m.p.224.6-227.3. IR(KBr): 3663, 3566, 2962, 2361, 1616, 1578, 1450, 1381, 1263, 1099, 918, 813, 742. <sup>1</sup>H NMR (400 MHz, CDCl<sub>3</sub>) δ 8.59 (dd, *J* = 9.0, 5.8 Hz, 1H), 8.23 (d, *J* = 8.6 Hz, 1H), 7.76 (d, *J* = 9.9 Hz, 1H), 7.23 (d, *J* = 8.7 Hz, 1H), 7.13 (d, *J* = 2.7 Hz, 1H), 7.00 (d, *J* = 11.2 Hz, 2H), 6.93 (d, *J* = 2.7 Hz, 1H), 4.30 (s, 3H), 3.97 (s, 3H); <sup>13</sup>C NMR (101 MHz, CDCl<sub>3</sub>) δ 175.4, 164.9, 164.3, 162.4, 156.3, 152.5, 132.9, 132.8, 130.8, 128.1, 127.8, 126.8, 126.7, 121.6, 121.5, 117.2, 117.0, 113.7, 113.6, 113.4, 110.0, 110.0, 107.4, 107.2, 100.7, 99.6, 55.86, 40.92. HRMS (ESI) calc. for C<sub>21</sub>H<sub>14</sub>FNO<sub>3</sub>[M + Na]<sup>+</sup> 370.0850, found 370.0860.

**Ethyl-1-methyl-13-oxo-1,13-dihydrobenzo[e]chromeno[2,3-g]indole-5-carboxylate (3p)**

Yield: 64%. Characteristic: a yellow powder. m.p.188.1-189.0. IR(KBr): 3688,

3440, 3300, 2387, 2304, 1708, 1658, 1585, 1463, 1236, 1035, 765, 729. <sup>1</sup>H NMR (400 MHz, CDCl<sub>3</sub>) δ 8.79 (s, 1H), 8.54 (d, *J* = 8.7 Hz, 1H), 8.29 (d, *J* = 8.7 Hz, 1H), 8.03 (d, *J* = 8.6 Hz, 1H), 7.73 (t, *J* = 8.1 Hz, 1H), 7.60 (d, *J* = 8.3 Hz, 1H), 7.41 (t, *J* = 7.5 Hz, 1H), 7.11 (d, *J* = 2.9 Hz, 1H), 7.03 (d, *J* = 3.0 Hz, 1H), 4.49 (q, *J* = 7.1 Hz, 2H), 4.25 (s, 3H), 1.50 (t, *J* = 7.1 Hz, 3H); <sup>13</sup>C NMR (101 MHz, CDCl<sub>3</sub>) δ 176.3, 166.7, 154.7, 151.9, 133.9, 131.3, 130.9, 130.5, 127.6, 126.4, 125.3, 124.3, 124.1, 123.7, 123.4, 122.7, 122.6, 117.6, 111.8, 101.0, 61.48, 40.99, 14.58. HRMS (ESI) calc. for C<sub>23</sub>H<sub>17</sub>NO<sub>4</sub>[M + Na]<sup>+</sup> 394.1050, found 394.1046.

**Benzo[e]chromeno[2,3-g]indol-13(1H)-one (3q)**

Yield: 40%. Characteristic: a yellow powder. m.p. 237.8-238.5. IR(KBr): 3741, 3616, 3020, 2360, 1649, 1612, 1514, 1275, 1148, 1049, 866, 788, 750. <sup>1</sup>H NMR (400 MHz, DMSO) δ 11.94 (s, 1H), 8.73 (d, *J* = 8.3 Hz, 1H), 8.40 (d, *J* = 8.1 Hz, 1H), 8.35 (d, *J* = 7.5 Hz, 1H), 8.01 – 7.92 (m, 2H), 7.84 (t, *J* = 7.6 Hz, 1H), 7.65 (t, *J* = 7.5 Hz, 1H), 7.62 – 7.56 (m, 1H), 7.46 (t, *J* = 2.7 Hz, 1H), 7.25 – 7.18 (m, 1H); <sup>13</sup>C NMR (101 MHz, DMSO) δ 176.7, 155.6, 151.0, 135.1, 131.6, 130.5, 126.2, 125.7, 125.2, 124.7, 124.6, 124.1, 123.9, 122.3, 119.7, 119.4, 119.0, 108.3, 101.5. HRMS (ESI) calc. for C<sub>19</sub>H<sub>11</sub>NO<sub>2</sub>[M + Na]<sup>+</sup> 308.0682, found 308.0684.

**5-Methoxy-13H-benzo[c]furo[2,3-a]xanthen-13-one (3r)**

Yield: 25%. Characteristic: a white powder. m.p. 248.2-249.1. IR(KBr): 3524, 3109, 2924, 2855, 2357, 1736, 1632, 1472, 1387, 1229, 1024, 824, 754. <sup>1</sup>H NMR (400 MHz, CDCl<sub>3</sub>) δ 8.55 (d, *J* = 9.2 Hz, 1H), 8.45 (d, *J* = 7.2 Hz, 1H), 7.93 (d, *J* = 1.7 Hz, 1H), 7.76 (t, *J* = 7.1 Hz, 1H), 7.65 (d, *J* = 8.3 Hz, 1H), 7.45 (t, *J* = 7.4 Hz, 1H), 7.37 (d, *J* = 2.1 Hz, 1H), 7.22 (dd, *J* = 9.2, 2.3 Hz, 1H), 7.18 (d, *J* = 1.7 Hz, 1H), 4.01 (s, 3H); <sup>13</sup>C NMR (101 MHz, CDCl<sub>3</sub>) δ 174.9, 161.4, 155.2, 152.8, 148.1, 145.1, 134.0, 132.1, 126.5, 125.9, 124.4, 123.0, 118.8, 117.8, 116.8, 115.9, 107.3, 104.7, 103.6, 55.57. HRMS (ESI) calc. for C<sub>20</sub>H<sub>12</sub>O<sub>4</sub>[M + Na]<sup>+</sup> 339.0628, found 339.0638.

**5-Methoxy-13H-benzo[c]thieno[2,3-a]xanthen-13-one (3s)**

Yield: 18%. Characteristic: a white powder. m.p. 256.8-257.3. IR(KBr): 3724, 2924, 2855, 2357, 1680, 1622, 1472, 1387, 1220, 1024, 917, 754. <sup>1</sup>H NMR (600 MHz, CDCl<sub>3</sub>) δ 8.61 (d, *J* = 9.1 Hz, 1H), 8.47 (dd, *J* = 7.9, 1.4 Hz, 1H), 7.92 (d, *J* = 5.4 Hz, 1H), 7.81 – 7.77 (m, 1H), 7.71 (dd, *J* = 7.0, 3.3 Hz, 2H), 7.65 (d, *J* = 2.3 Hz, 1H), 7.49 (t, *J* = 7.4 Hz, 1H), 7.28 (dd, *J* = 9.1, 2.4 Hz, 1H), 4.04 (s, 3H); <sup>13</sup>C NMR (151 MHz, DMSO) δ 174.6, 161.9, 154.8, 152.2, 134.8, 133.7, 132.3, 128.7, 125.6, 125.5, 125.0, 121.7, 121.4, 118.5, 117.5, 116.1, 111.5, 105.1, 99.5, 55.9. HRMS (ESI) calc. for C<sub>20</sub>H<sub>12</sub>O<sub>3</sub>S[M + Na]<sup>+</sup> 355.0399, found 355.0405.

**(3-Methyl-3H-benzo[e]indol-4-yl)(phenyl)methanone (5a)**

Yield: 57%. Characteristic: a colorless liquid. IR(KBr): 3745, 3447, 3157, 2922, 2357, 1649, 1531, 1467, 1364, 1242, 1072, 943, 885, 777. <sup>1</sup>H NMR (400 MHz, CDCl<sub>3</sub>) δ 8.28 (d, *J* = 8.2 Hz, 1H), 8.01 (d, *J* = 7.9 Hz, 2H), 7.86 (d, *J* = 8.1 Hz, 1H), 7.68 – 7.59 (m, 3H), 7.51 (t, *J* = 7.6 Hz, 2H), 7.44 (t, *J* = 7.5 Hz, 1H), 7.15 (d, *J* = 2.9 Hz, 1H), 7.12 (d, *J* = 3.0 Hz, 1H), 3.71 (s, 3H); <sup>13</sup>C NMR (101 MHz, CDCl<sub>3</sub>) δ 196.4, 138.2, 133.5, 130.8, 129.9, 129.5, 129.5, 129.1, 128.6, 127.4, 127.3, 125.8, 125.4, 125.4, 124.0, 122.8, 100.5, 37.30. HRMS (ESI) calc. for C<sub>20</sub>H<sub>15</sub>NO [M + Na]<sup>+</sup> 308.1046, found 308.1052.

### **(3H-Benzo[e]indol-4-yl)(phenyl)methanone (5b)**

Yield: 42%. Characteristic: a yellow powder. m.p. 172.3-174.5 IR(KBr): 3347, 3053, 2922, 2356, 1699, 1622, 1446, 1298, 1095, 966, 881, 741. <sup>1</sup>H NMR (600 MHz, CDCl<sub>3</sub>) δ 10.52 (s, 1H), 8.29 (d, *J* = 8.2 Hz, 1H), 8.04 (s, 1H), 7.92 (d, *J* = 8.1 Hz, 1H), 7.86 (d, *J* = 7.3 Hz, 2H), 7.68 (t, *J* = 7.5 Hz, 1H), 7.65 (t, *J* = 7.5 Hz, 1H), 7.57 (t, *J* = 7.6 Hz, 2H), 7.46 (d, *J* = 2.7 Hz, 1H), 7.44 (d, *J* = 8.6 Hz, 1H), 7.15 (t, *J* = 2.6 Hz, 1H); <sup>13</sup>C NMR (151 MHz, CDCl<sub>3</sub>) δ 198.2, 139.0, 131.8, 131.1, 130.9, 130.8, 130.5, 129.6, 128.9, 128.4, 127.8, 124.3, 124.0, 123.5, 123.1, 121.1, 101.4. HRMS (ESI) calc. for C<sub>19</sub>H<sub>13</sub>NO [M + Na]<sup>+</sup> 294.0889, found 294.0900.

### **1-(3-Methyl-3H-benzo[e]indol-4-yl)ethan-1-one (5c)**

Yield: 47%. Characteristic: a white crystal. m.p. 98.1-99.3 IR(KBr): 3445, 3130, 2357, 1674, 1441, 1356, 1244, 1155, 1085, 949, 851, 743. <sup>1</sup>H NMR (400 MHz, CDCl<sub>3</sub>) δ 8.23 (d, *J* = 8.2 Hz, 1H), 7.93 (d, *J* = 7.8 Hz, 2H), 7.66 – 7.58 (m, 1H), 7.45 (ddd, *J* = 8.0, 7.0, 1.1 Hz, 1H), 7.14 (d, *J* = 3.0 Hz, 1H), 7.06 (d, *J* = 3.1 Hz, 1H), 3.85 (s, 3H), 2.84 (s, 3H); <sup>13</sup>C NMR (151 MHz, CDCl<sub>3</sub>) δ 195.3, 125.0, 124.8, 124.0, 123.5, 122.6, 122.2, 122.0, 121.1, 119.9, 118.7, 117.6, 95.1, 32.91, 24.22. HRMS (ESI) calc. for C<sub>15</sub>H<sub>13</sub>NO [M + Na]<sup>+</sup> 246.0889, found 246.0895.

### **1-(3H-Benzo[e]indol-4-yl)ethan-1-one (5d)**

Yield: 38%. Characteristic: a silver powder. m.p. 143.4-144.5 IR(KBr): 3742, 3371, 2922, 2359, 1751, 1647, 1366, 1292, 1213, 1082, 972, 889, 745. <sup>1</sup>H NMR (600 MHz, CDCl<sub>3</sub>) δ 10.61 (s, 1H), 8.25 (d, *J* = 8.2 Hz, 1H), 8.22 (s, 1H), 8.00 (d, *J* = 8.1 Hz, 1H), 7.67 (t, *J* = 8.0 Hz, 1H), 7.47 (t, *J* = 7.5 Hz, 1H), 7.39 (t, *J* = 2.7 Hz, 1H), 7.09 (t, *J* = 2.7 Hz, 1H), 2.82 (s, 3H); <sup>13</sup>C NMR (151 MHz, CDCl<sub>3</sub>) δ 200.5, 131.1, 130.3, 130.0, 128.8, 128.0, 127.9, 124.2, 124.0, 123.5, 123.1, 121.9, 101.1, 26.48. HRMS (ESI) calc. for C<sub>14</sub>H<sub>11</sub>NO [M + Na]<sup>+</sup> 232.0733, found 232.0737.

### **2-(4-Methoxyphenyl)-3-(1-methyl-1H-pyrrol-2-yl)-4H-chromen-4-one (1aa)**

Yield: 25%. Characteristic: a white powder. m.p. 155.6-159.2. IR(KBr): 3447, 3118, 2922, 2356, 1638, 1462, 1369, 1253, 1175, 1028, 928, 878, 718. <sup>1</sup>H NMR (400 MHz, CDCl<sub>3</sub>) δ 8.27 (dd, *J* = 7.9, 1.4 Hz, 1H), 7.70 (ddd, *J* = 8.7, 7.2, 1.6 Hz, 1H), 7.54 (d, *J* = 8.3 Hz, 1H), 7.42 (t, *J* = 7.6 Hz, 1H), 7.32 – 7.30 (m, 1H), 7.30 – 7.27 (m, 1H), 6.86 – 6.84 (m, 1H), 6.83 – 6.81 (m, 1H), 6.78 – 6.69 (m, 1H), 6.20 – 6.13 (m, 1H), 5.98 (dd, *J* = 3.6, 1.7 Hz, 1H), 3.82 (s, 3H), 3.38 (s, 3H); <sup>13</sup>C NMR (101 MHz, CDCl<sub>3</sub>) δ 177.8, 162.7, 161.23, 155.9, 133.6, 130.3, 126.3, 125.4, 125.1, 124.6, 123.2, 122.7, 117.8, 113.7, 110.8, 108.4, 55.32, 34.20. HRMS (ESI) calc. for C<sub>21</sub>H<sub>17</sub>NO<sub>3</sub> [M + Na]<sup>+</sup> 354.1101, found 354.1107.

### **2-(2-(4-Methoxyphenyl)-4H-chromen-3-yl)-1-methyl-1H-pyrrole (1ab)<sup>2,3</sup>**

Yield: 60%. Characteristic: a pale yellow liquid. IR(KBr): 3690, 3443, 3123, 2384, 1719, 1578, 1506, 1246, 1121, 920, 843, 611. <sup>1</sup>H NMR (400 MHz, CDCl<sub>3</sub>) δ 7.22 (d, *J* = 8.2 Hz, 1H), 7.19 (d, *J* = 8.7 Hz, 2H), 7.11 (d, *J* = 7.2 Hz, 1H), 7.07 (d, *J* = 4.1 Hz, 1H), 7.04 (t, *J* = 5.3 Hz, 1H), 6.78 (d, *J* = 8.8 Hz, 2H), 6.49 (s, 1H), 6.18 (t, *J* = 3.0 Hz, 1H), 6.16 – 6.12 (m, 1H), 3.79 (s, 3H), 3.75 (s, 2H), 3.07 (s, 3H); <sup>13</sup>C NMR (101 MHz, CDCl<sub>3</sub>) δ 159.2, 151.6, 147.1, 131.7, 129.0, 128.4, 127.7, 127.4, 123.3, 121.2, 120.5, 116.1, 113.3, 107.9, 107.8, 100.6, 55.13, 33.82, 31.67. HRMS (ESI) calc. for C<sub>21</sub>H<sub>19</sub>NO<sub>2</sub> [M + Na]<sup>+</sup> 340.1308, found 340.1306.



## 2. References:

1. F. J. Zhang and Y. L. Li, *Synthesis*, 1993, **1993**, 565-567.
2. C. Valla, A. Baeza, F. Menges and A. Pfaltz, *Synlett*, 2008, **2008**, 3167-3171.
3. T. G. C. Bird, B. R. Brown, I. A. Stuart and A. W. R. Tyrrell, *Journal of the Chemical Society, Perkin Transactions 1*, 1983, 1831-1846.

### 3. $^1\text{H}$ NMR $^{13}\text{C}$ NMR and HRMS Spectra of 1, 3, 5, 1aa and 1ab

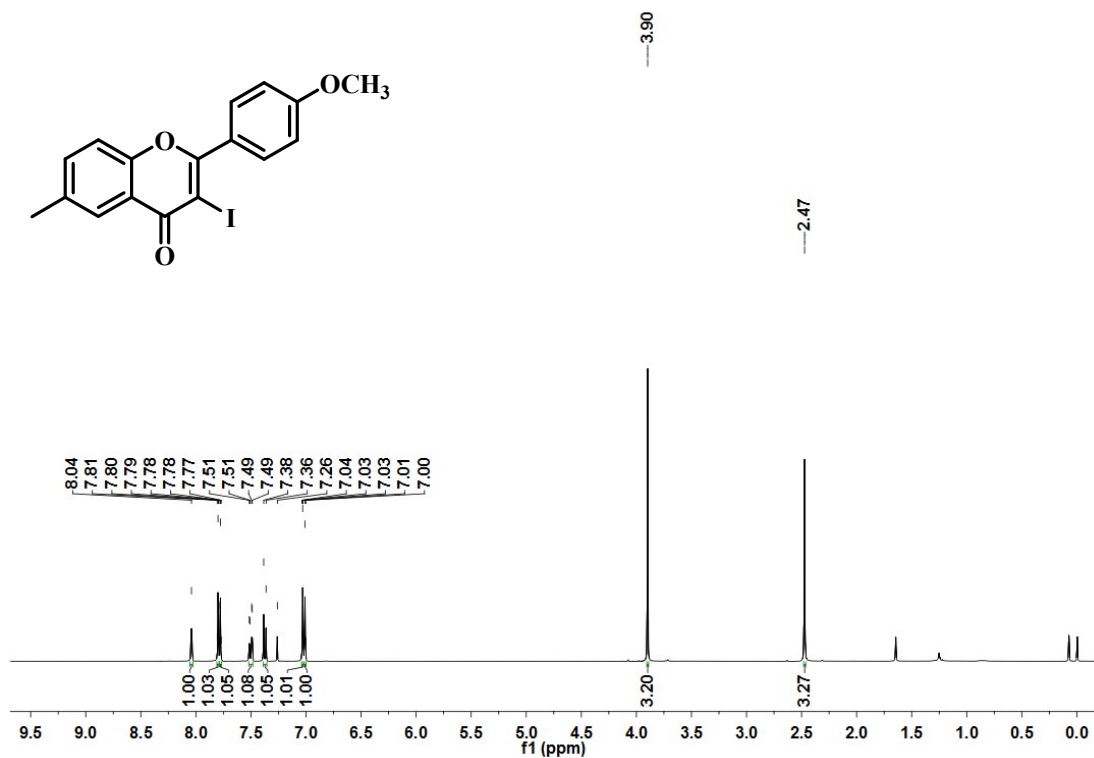

Compound 1b  $^1\text{H}$  NMR(CDCl<sub>3</sub>)

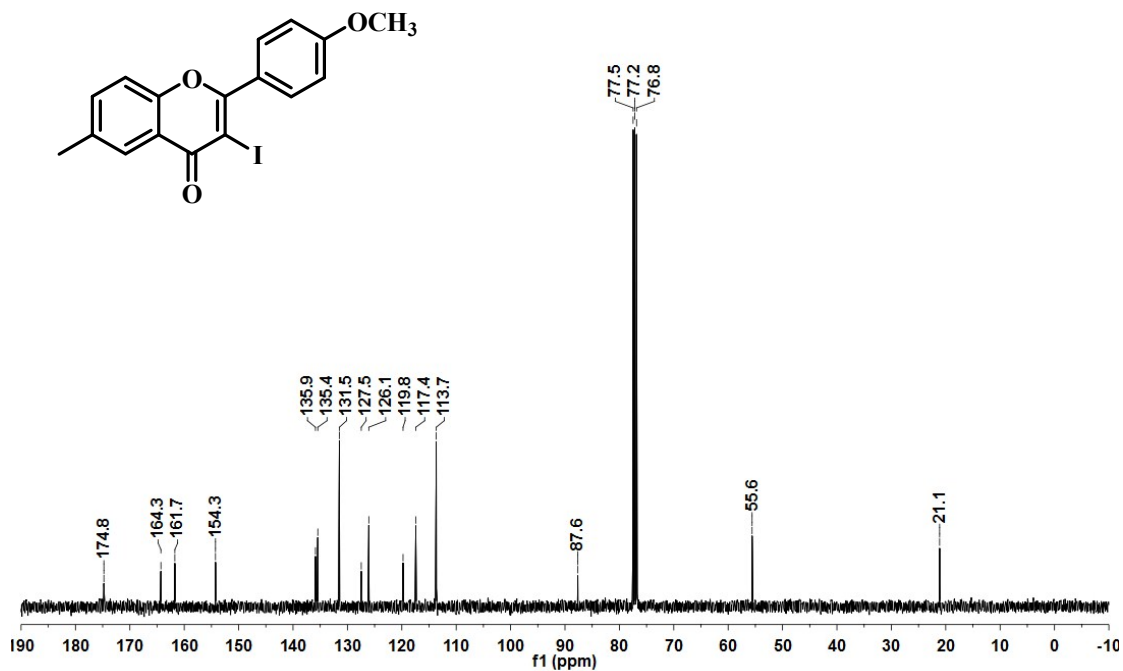

Compound 1b  $^{13}\text{C}$  NMR (CDCl<sub>3</sub>)

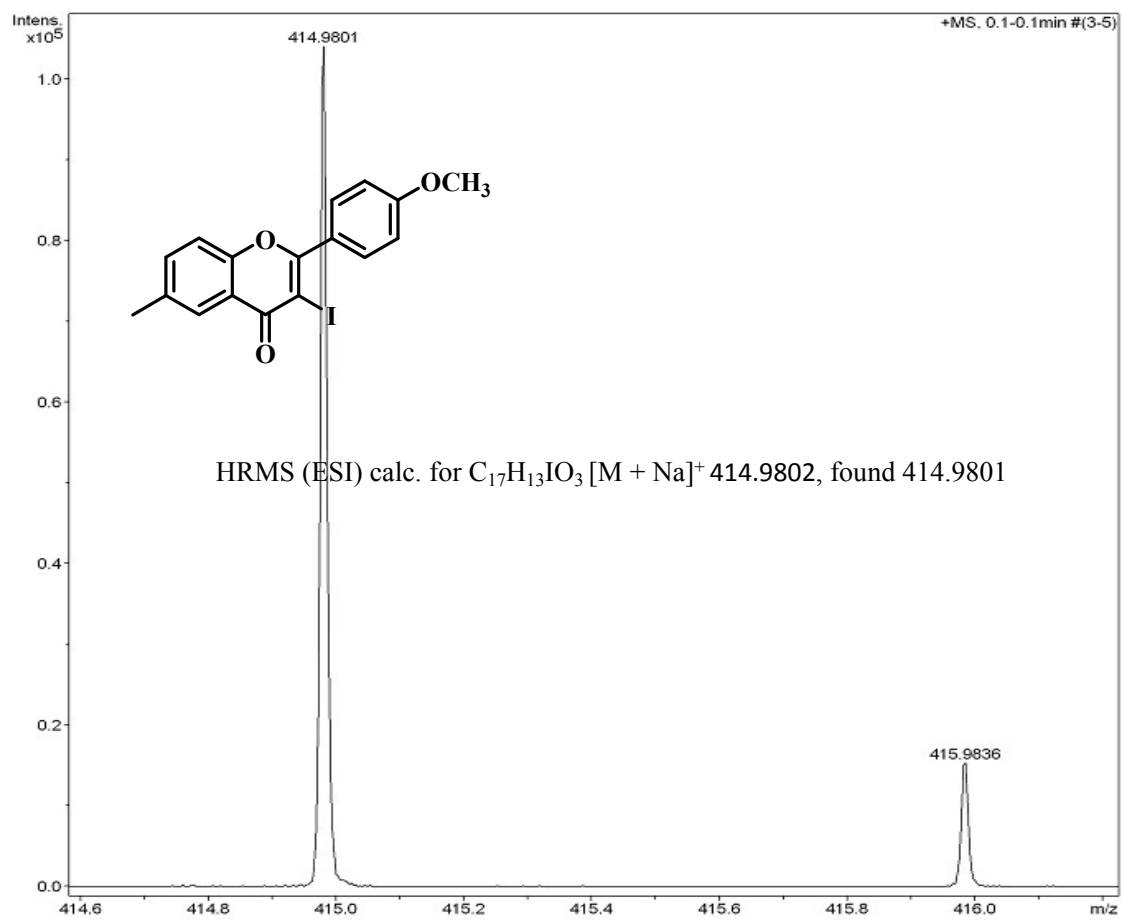

**Compound 1b** HRMS(MeOH)

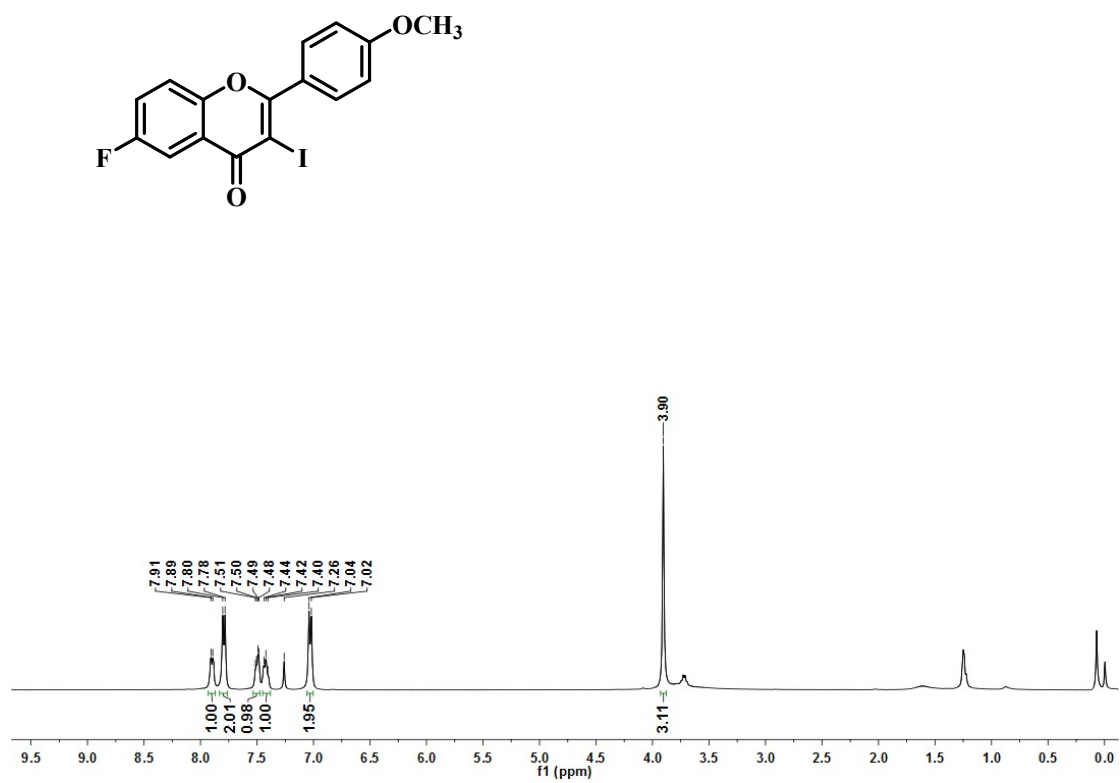

**Compound 1d**  $^1H$  NMR( $CDCl_3$ )

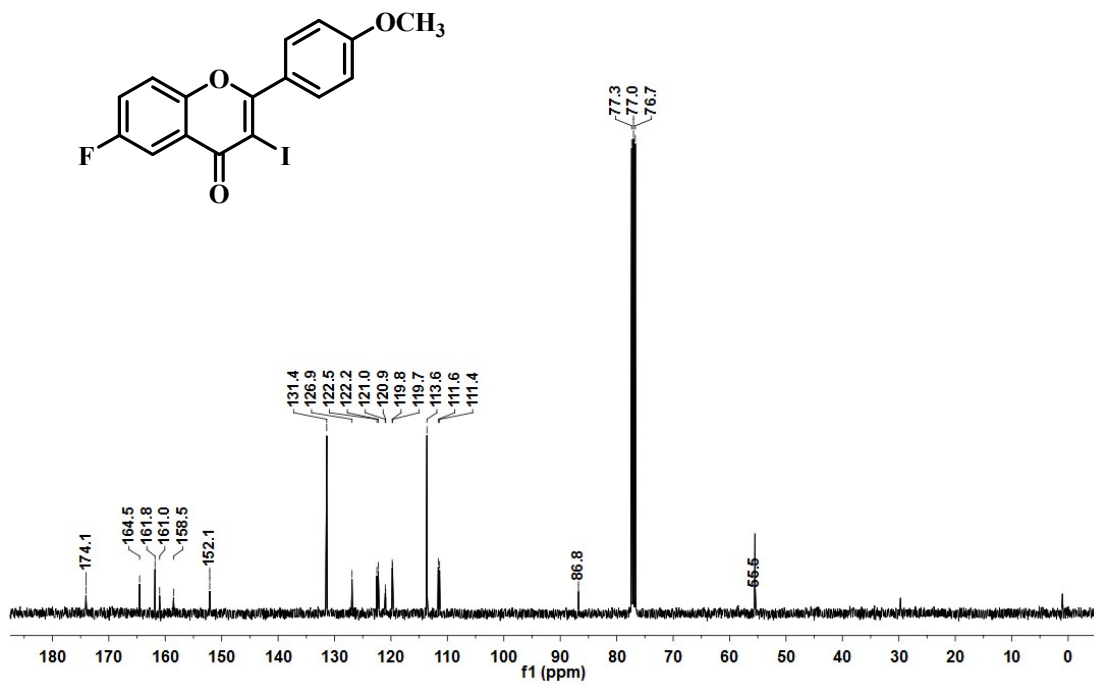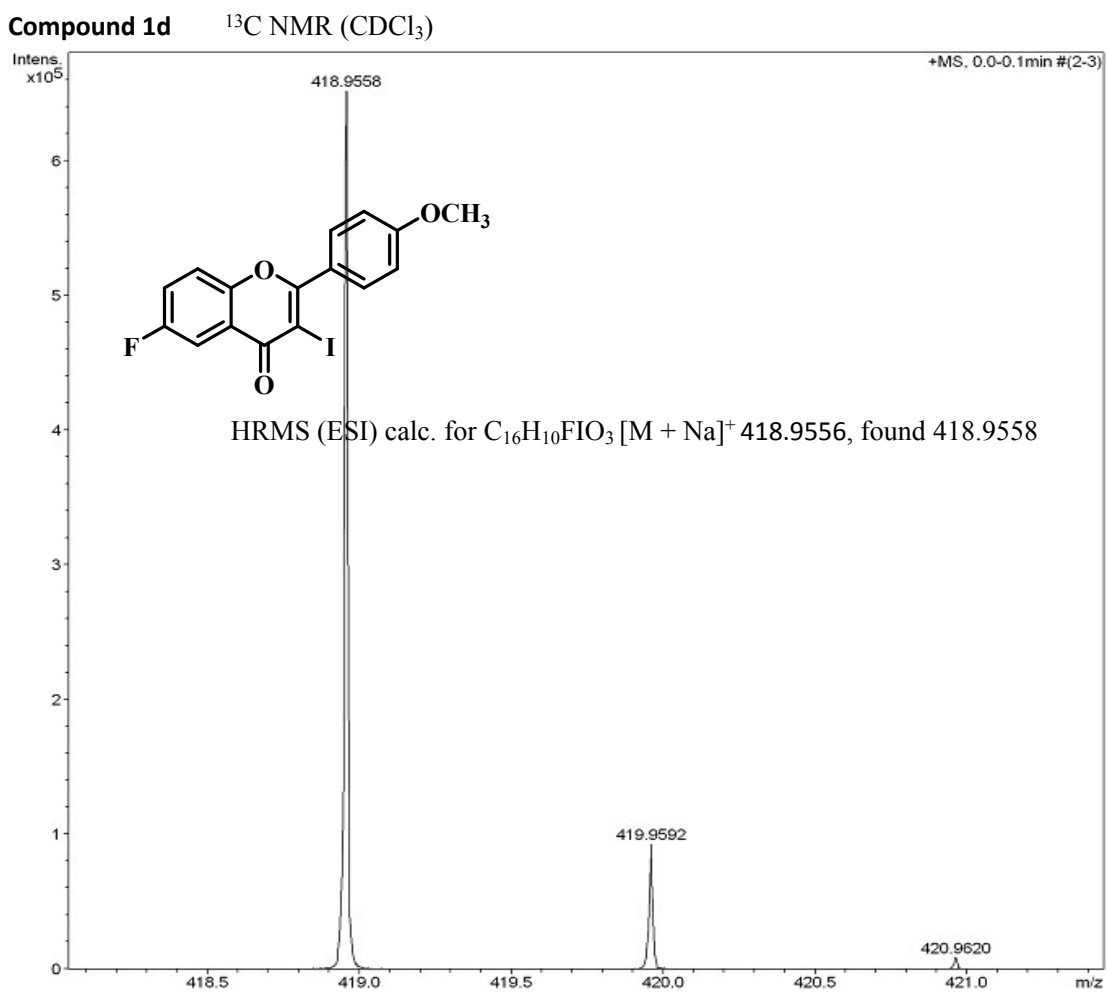

**Compound 1d** HRMS (MeOH)

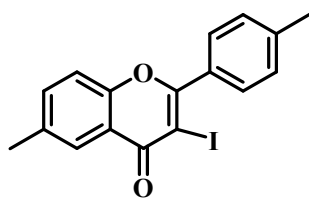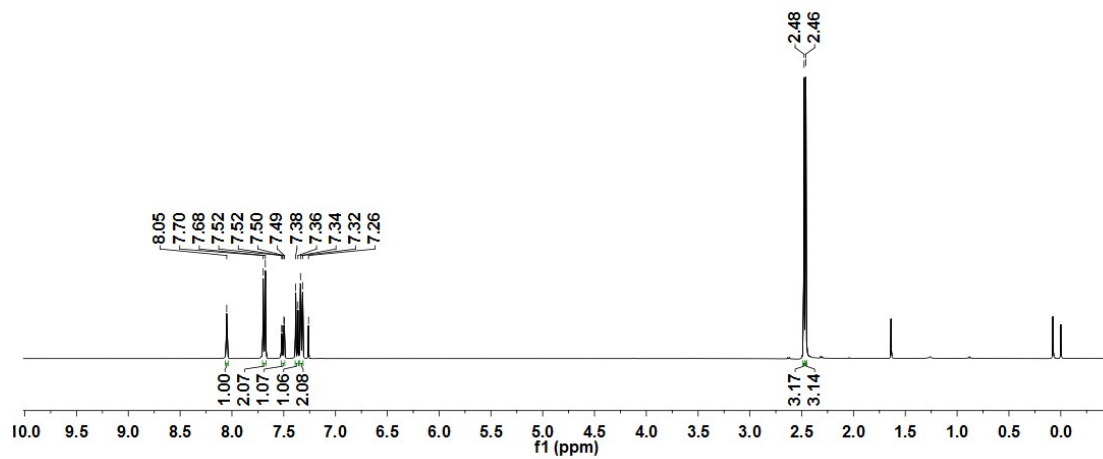

Compound 1f  $^1\text{H NMR}(\text{CDCl}_3)$

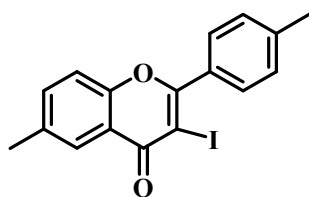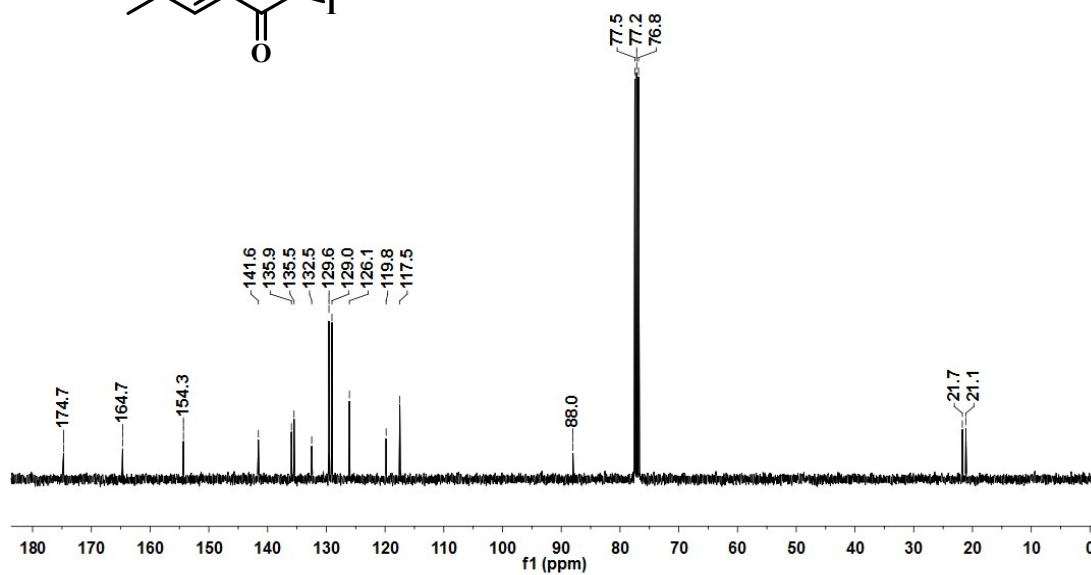

Compound 1f  $^{13}\text{C NMR}(\text{CDCl}_3)$

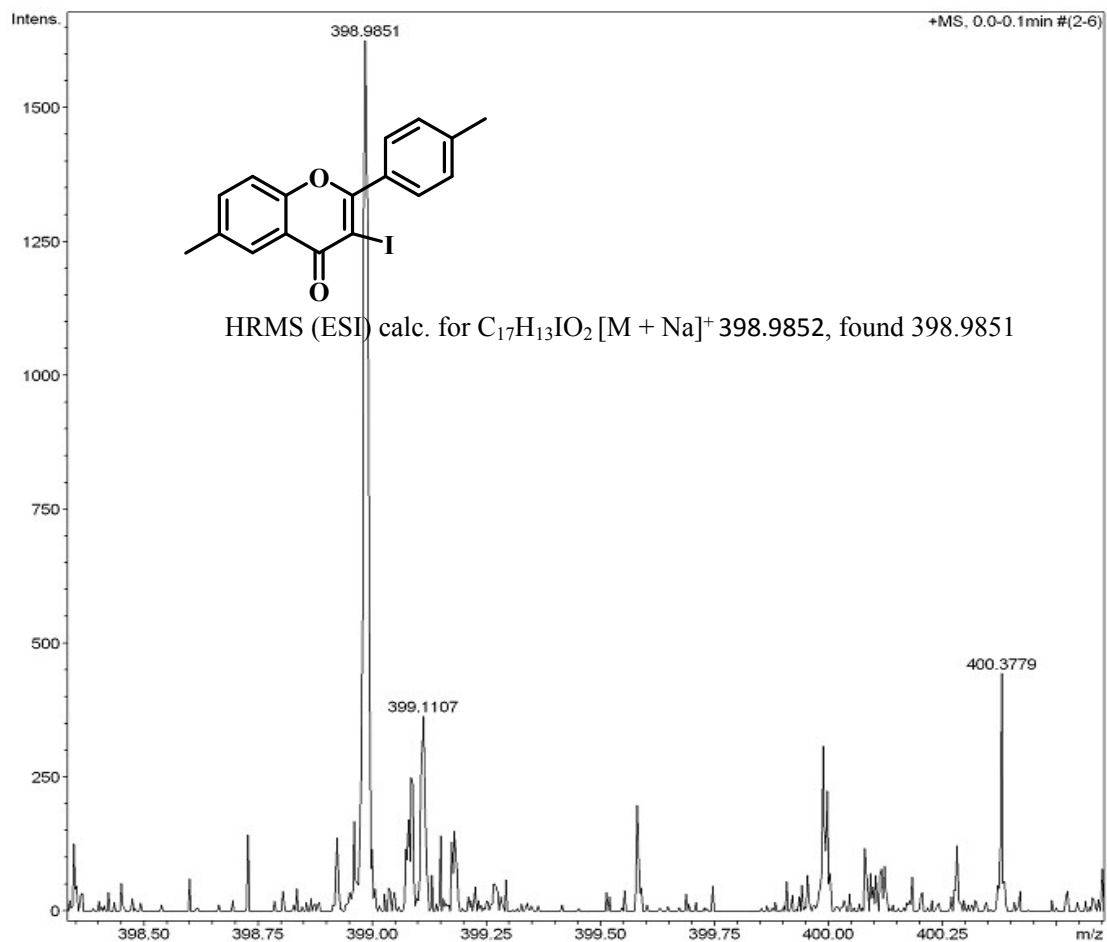

Compound 1f HRMS(MeOH)

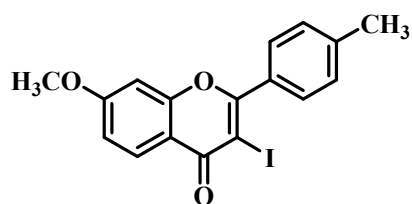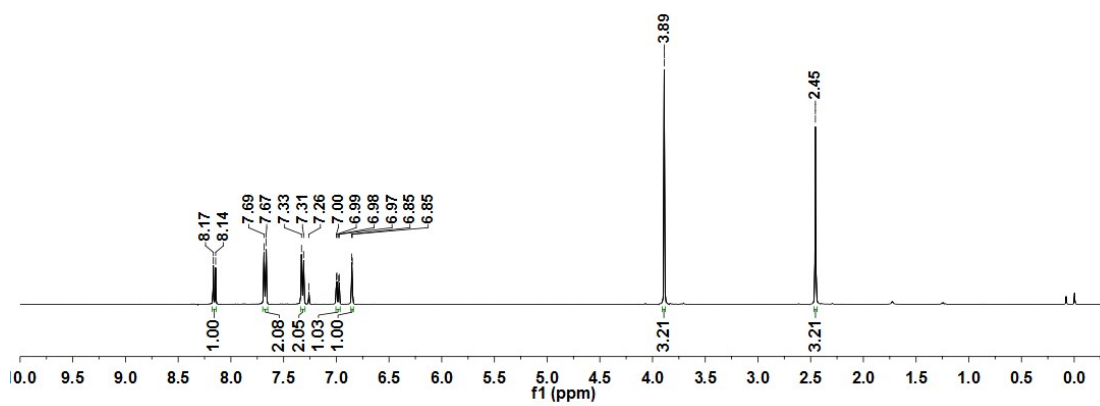

Compound 1g  $^1H$  NMR( $CDCl_3$ )

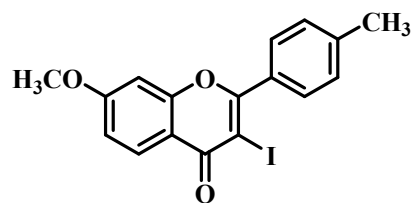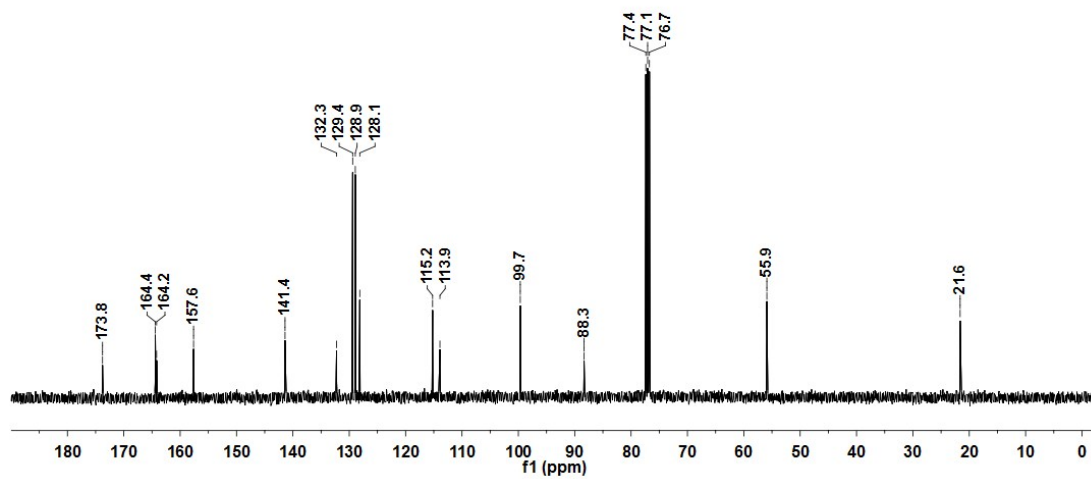

Compound 1g  $^{13}\text{C}$  NMR ( $\text{CDCl}_3$ )

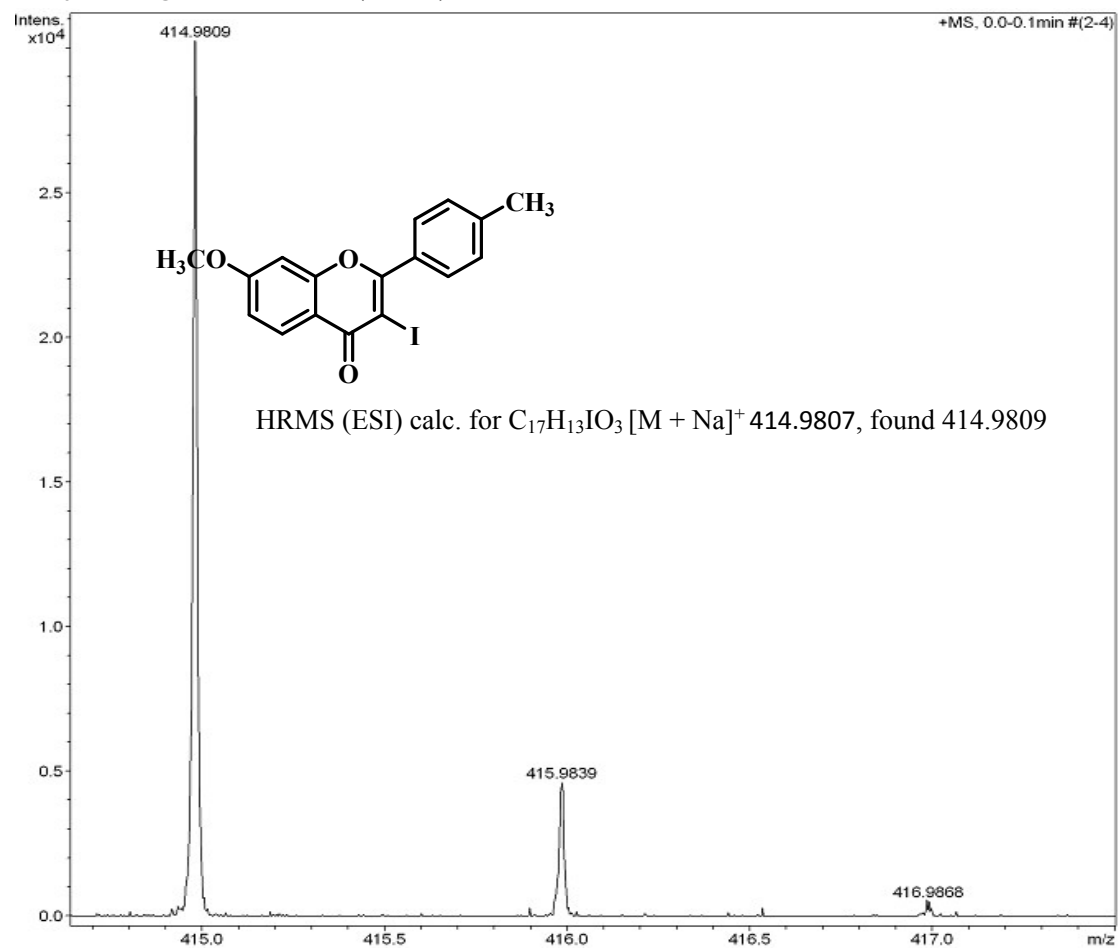

Compound 1g HRMS(MeOH)

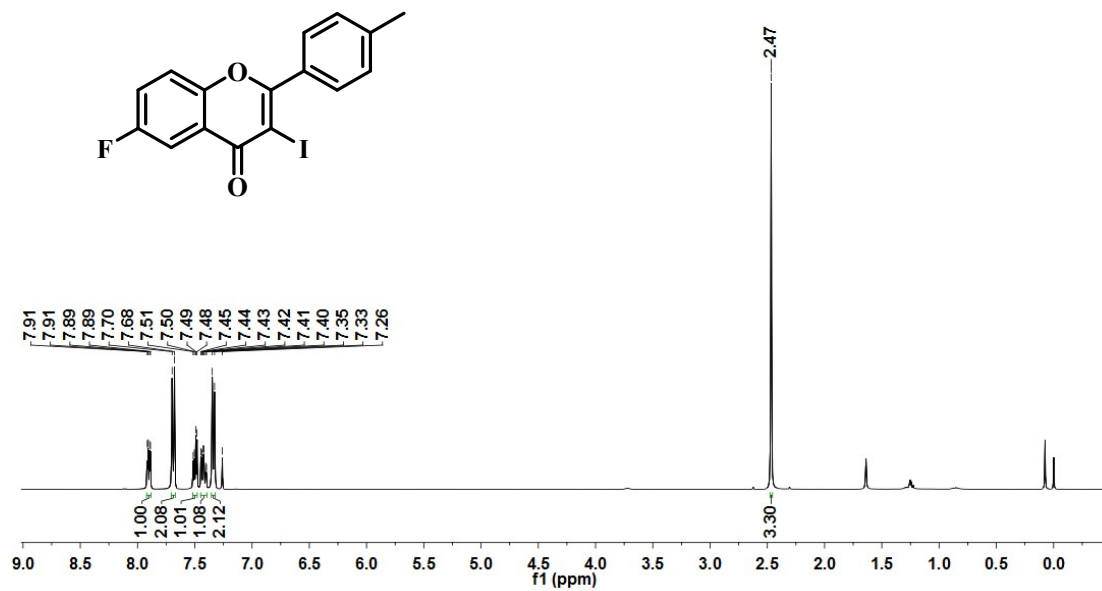

Compound 1h <sup>1</sup>H NMR(CDCl<sub>3</sub>)

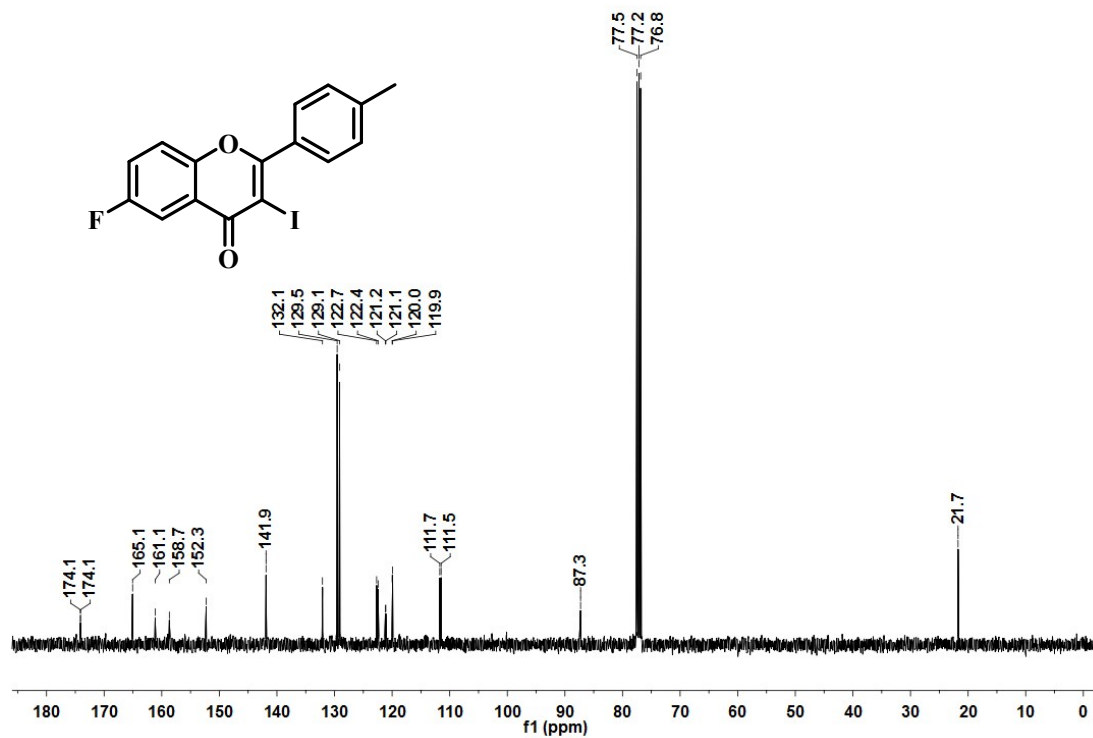

Compound 1h <sup>13</sup>C NMR (CDCl<sub>3</sub>)



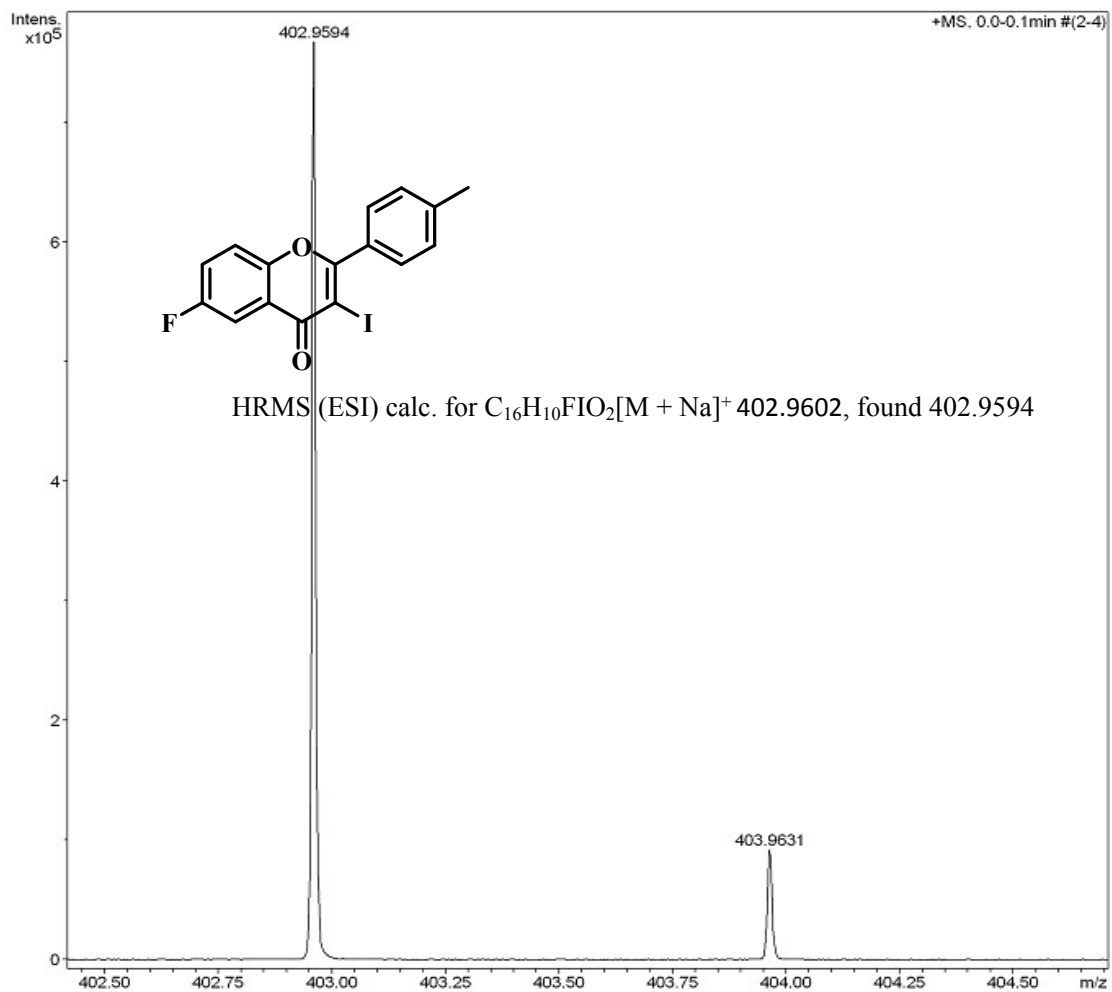

Compound 1h HRMS(MeOH)

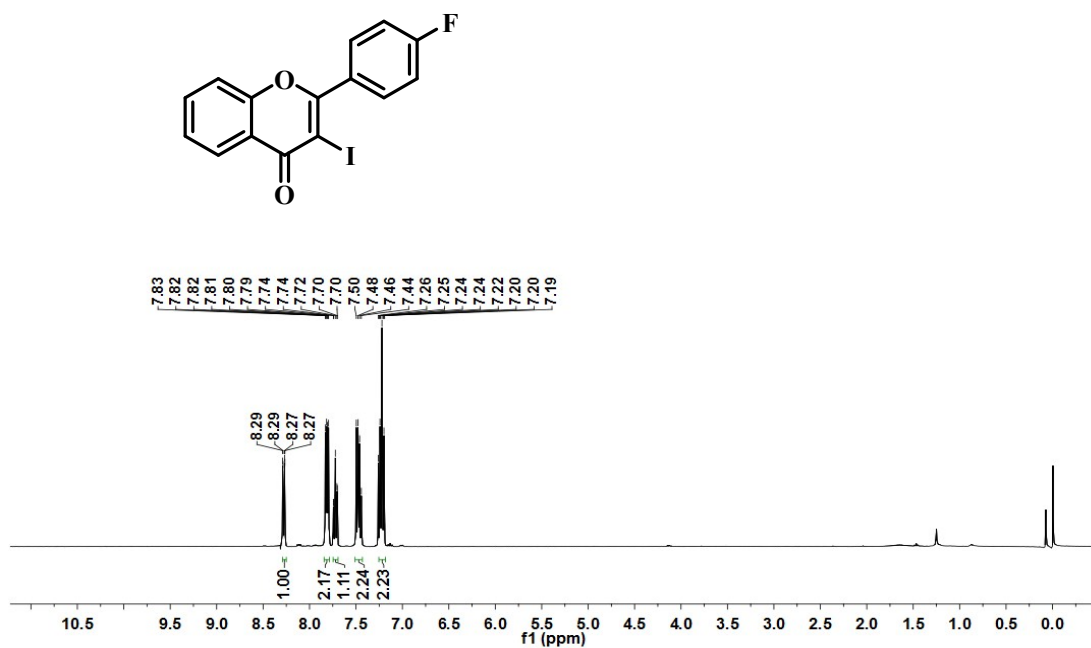

Compound 1m  $^1H$  NMR( $CDCl_3$ )

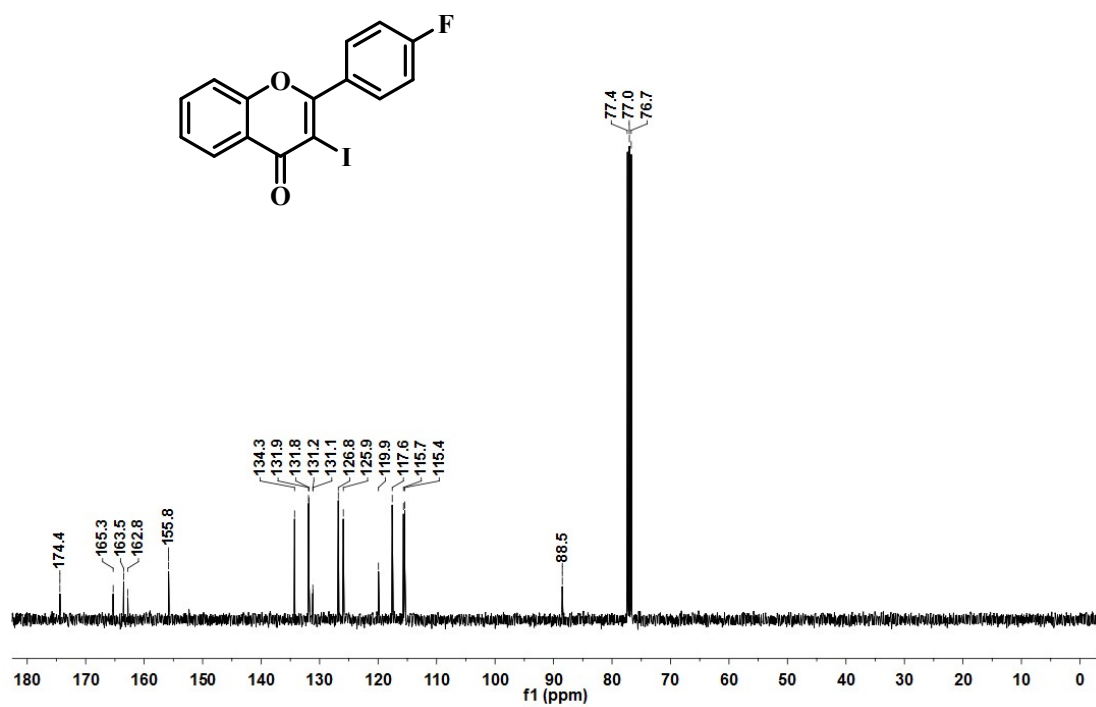

Compound 1m <sup>13</sup>C NMR (CDCl<sub>3</sub>)

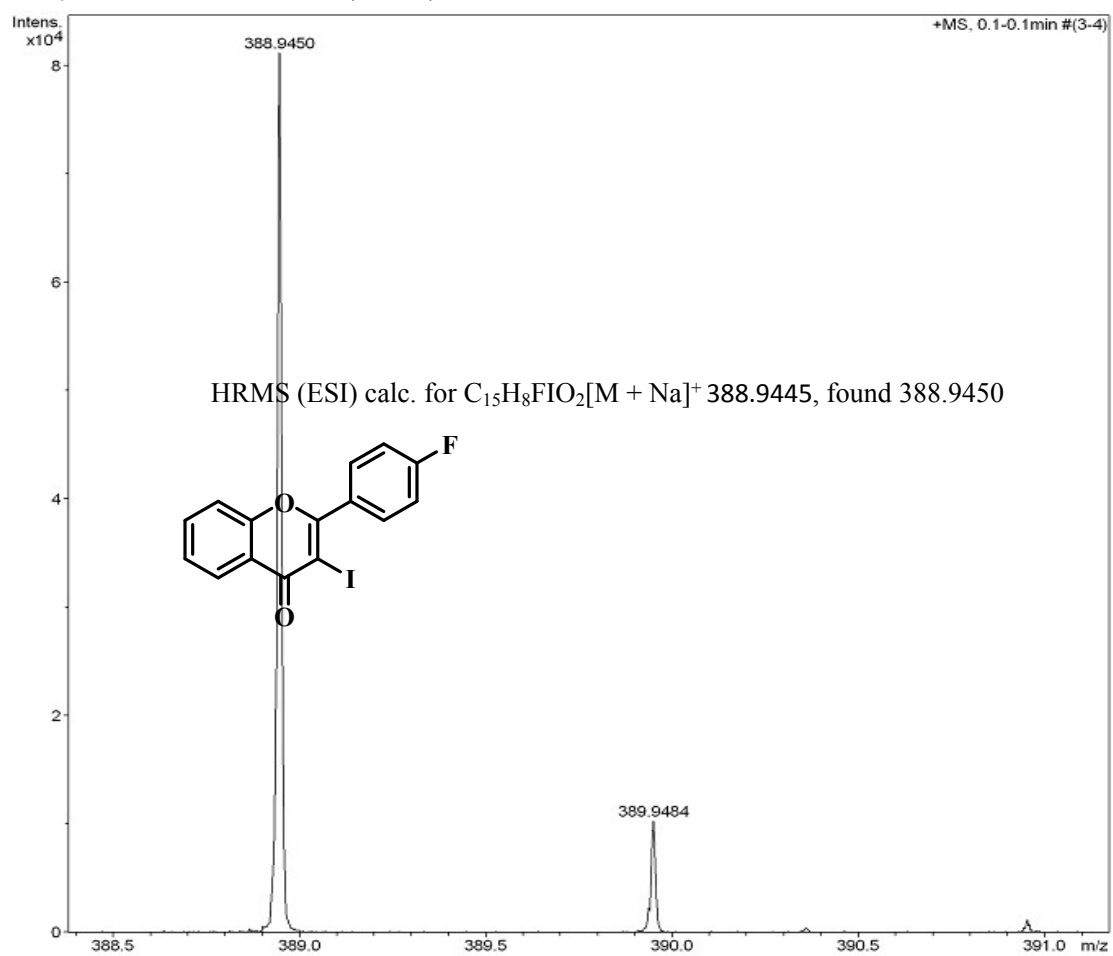

Compound 1m HRMS(MeOH)

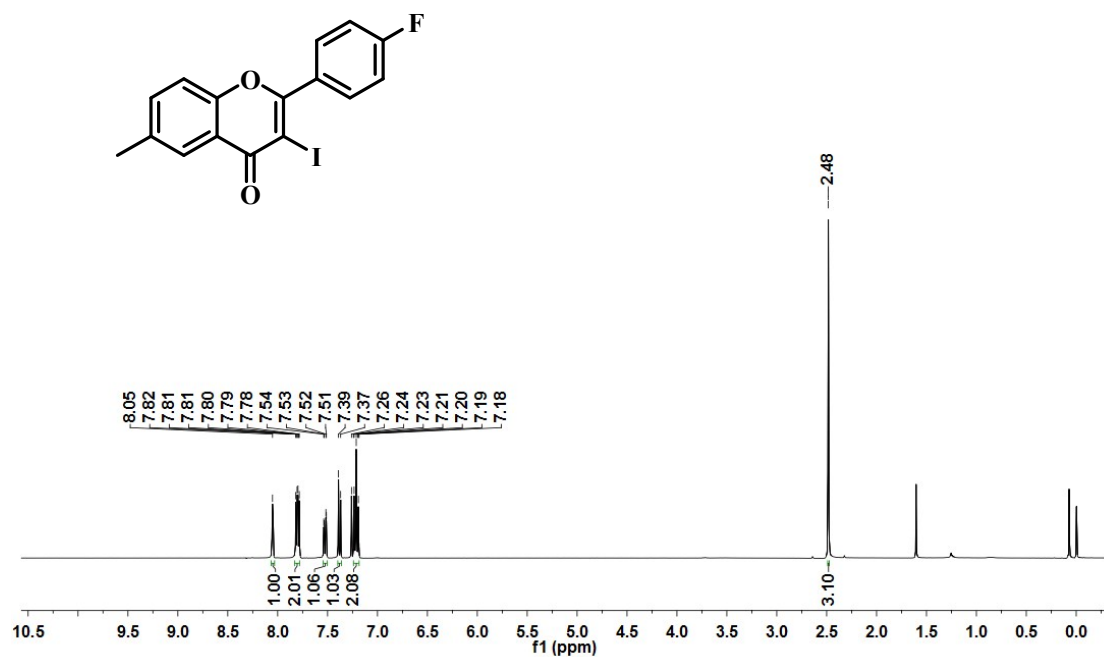

Compound 1n  $^1\text{H NMR}$ (CDCl<sub>3</sub>)

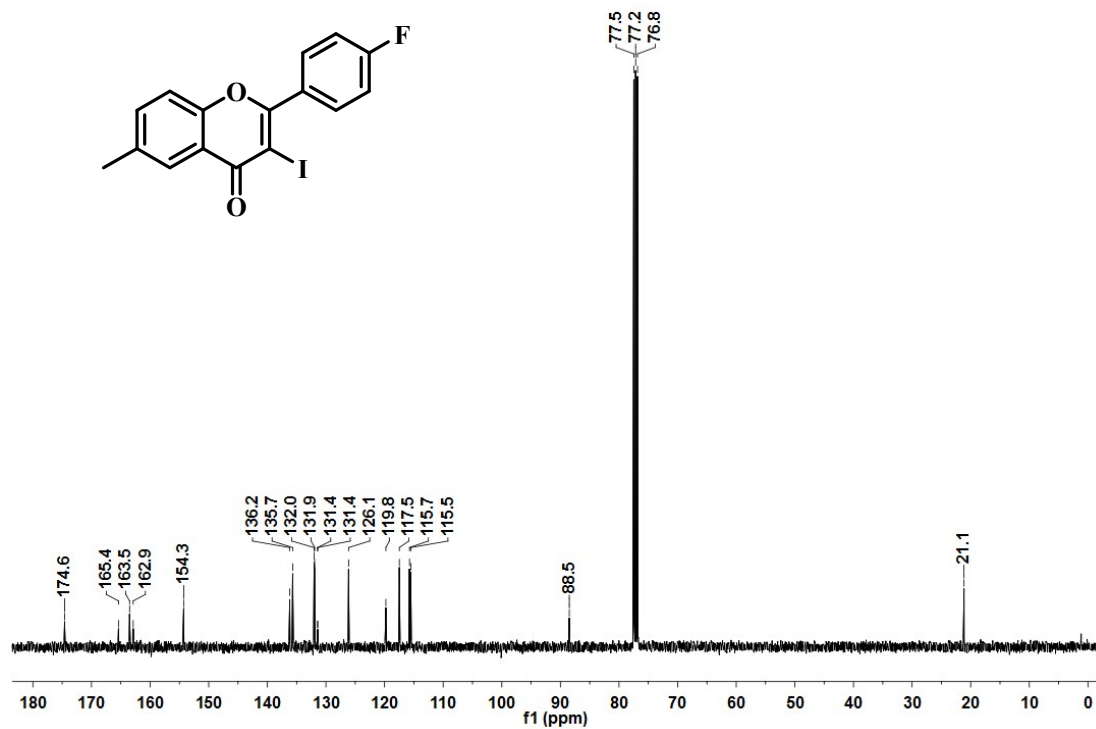

Compound 1n  $^{13}\text{C NMR}$  (CDCl<sub>3</sub>)

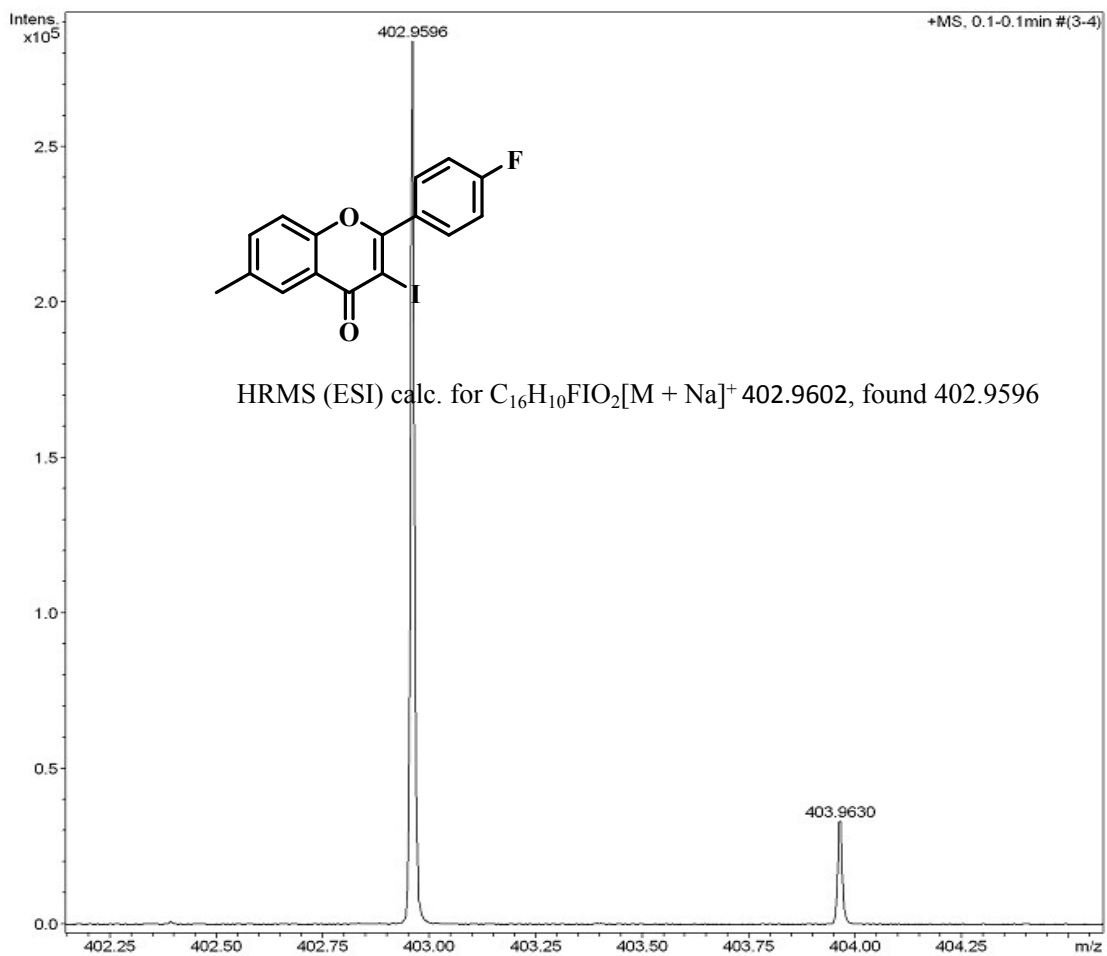

Compound 1n HRMS(MeOH)

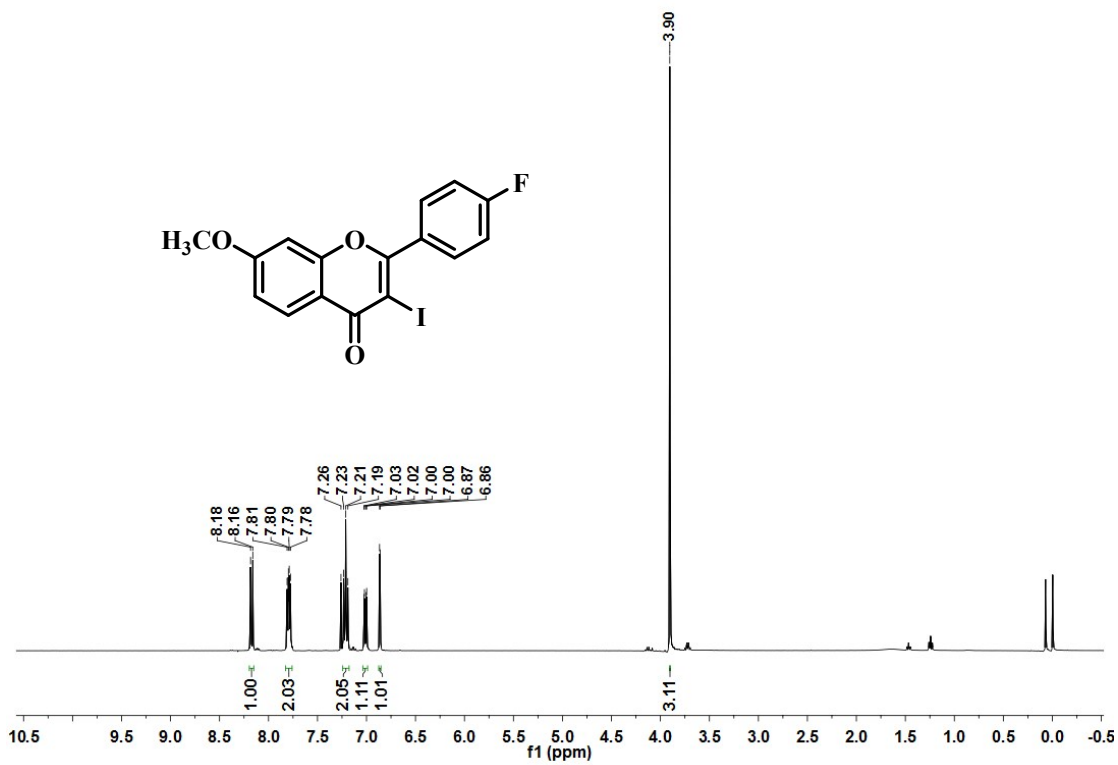

Compound 1o  $^1H$  NMR(CDCl<sub>3</sub>)

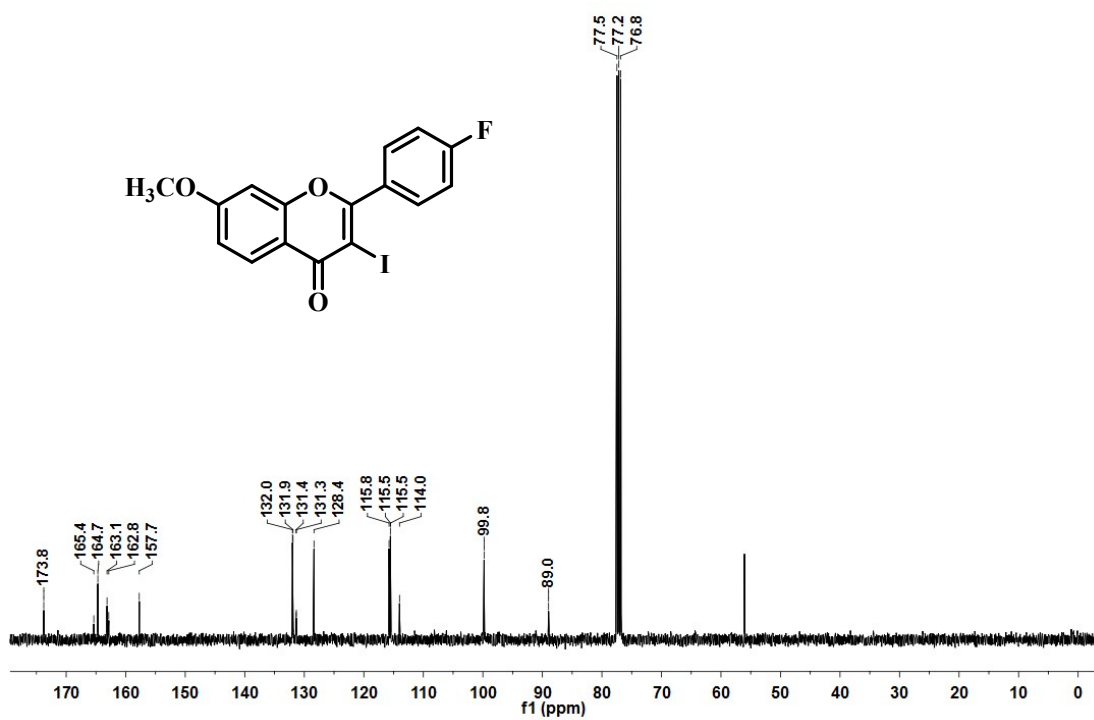

Compound 1o  $^{13}\text{C}$  NMR (CDCl<sub>3</sub>)

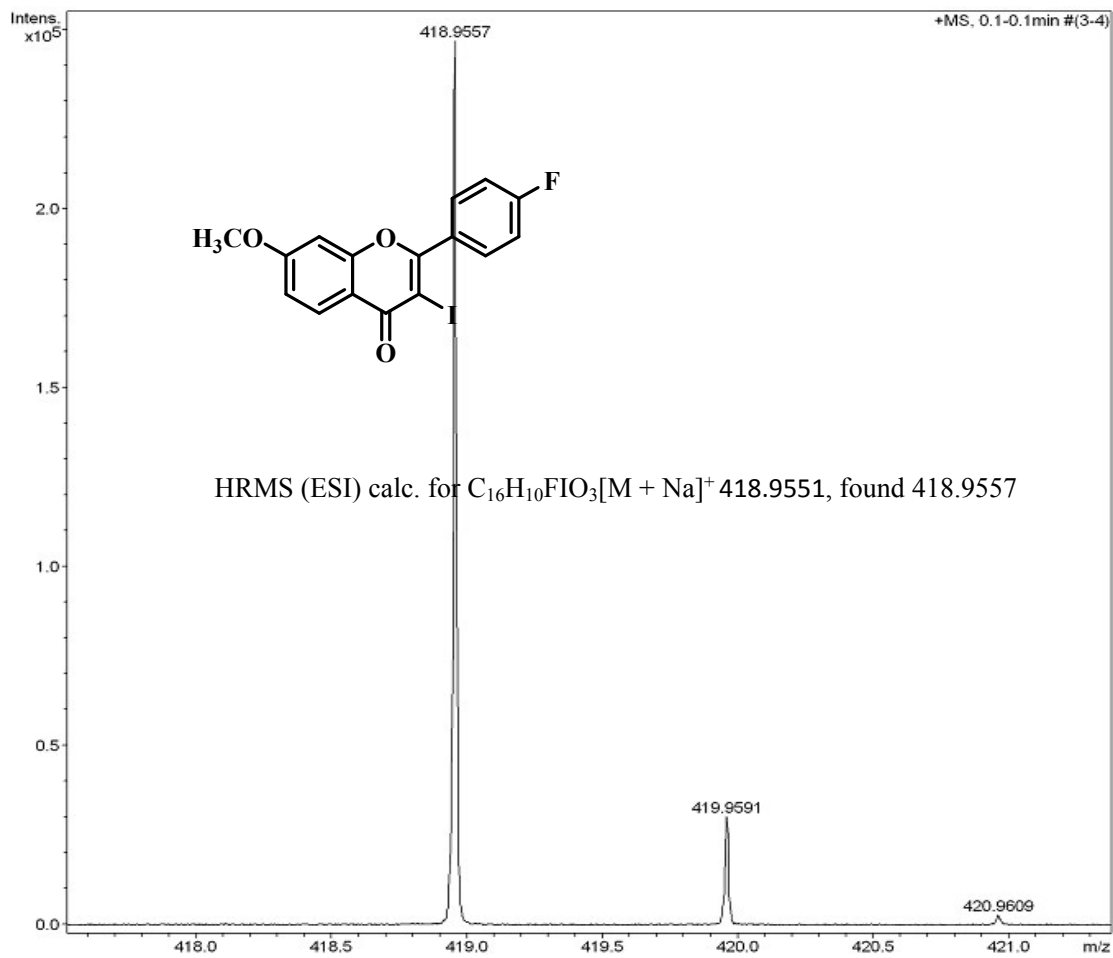

Compound 1o HRMS(MeOH)

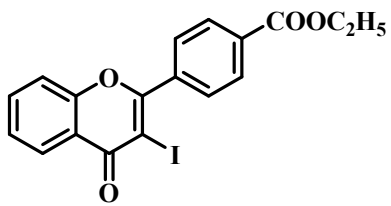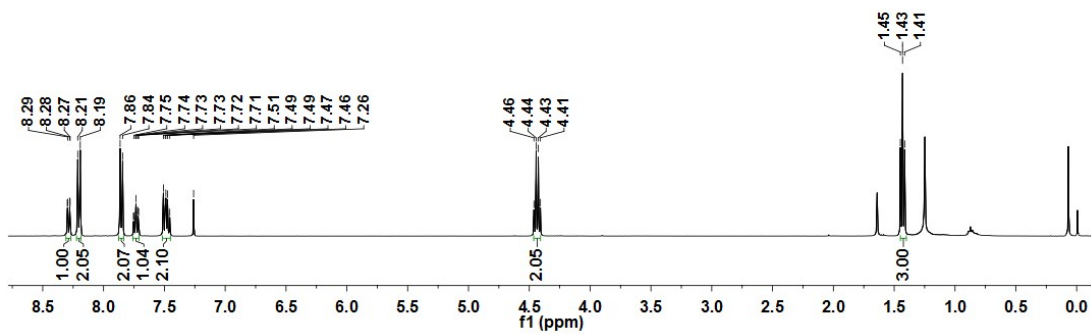

Compound 1p  $^1\text{H NMR}(\text{CDCl}_3)$

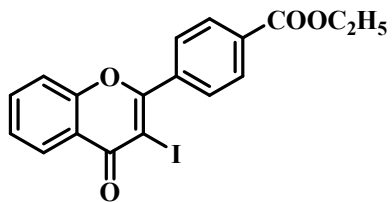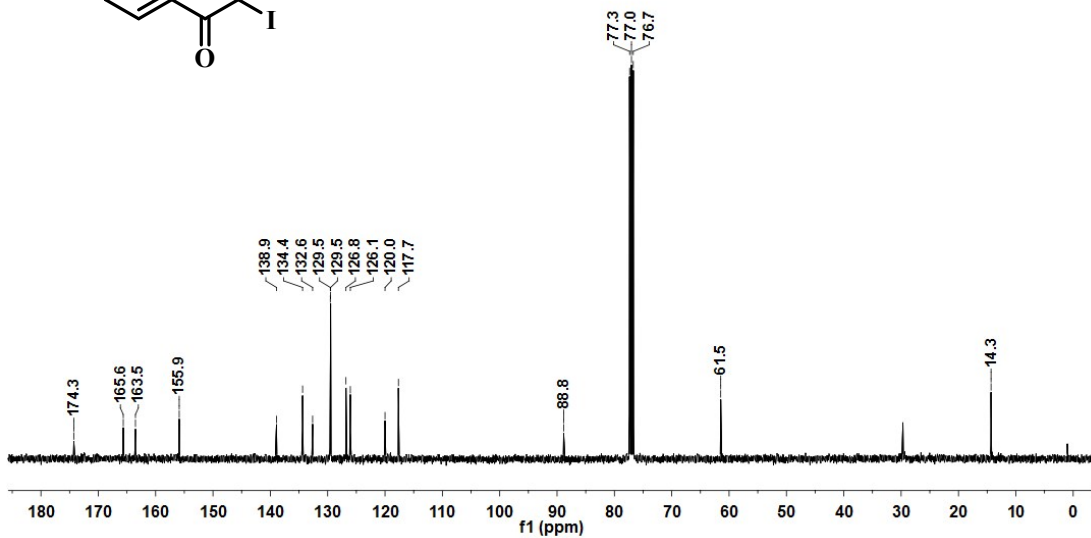

Compound 1p  $^{13}\text{C NMR}(\text{CDCl}_3)$

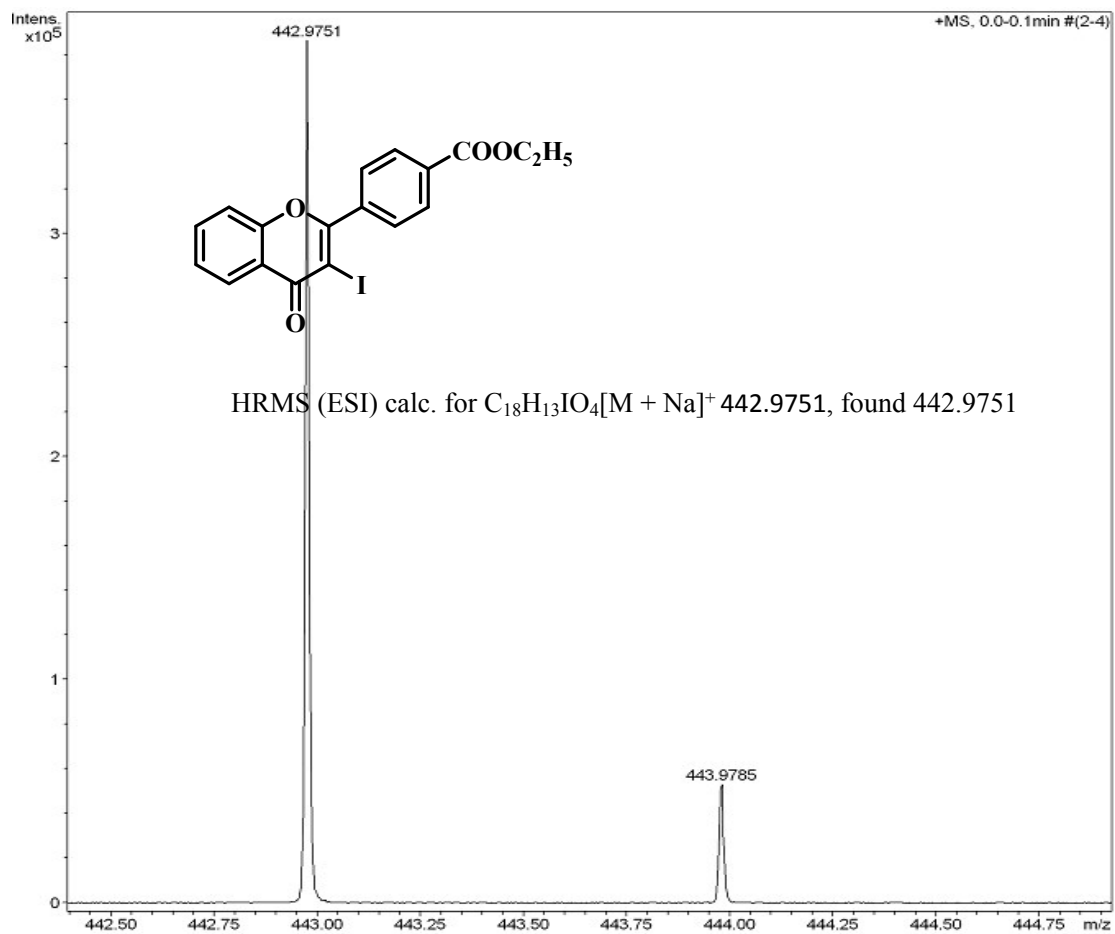

**Compound 1p** HRMS(MeOH)

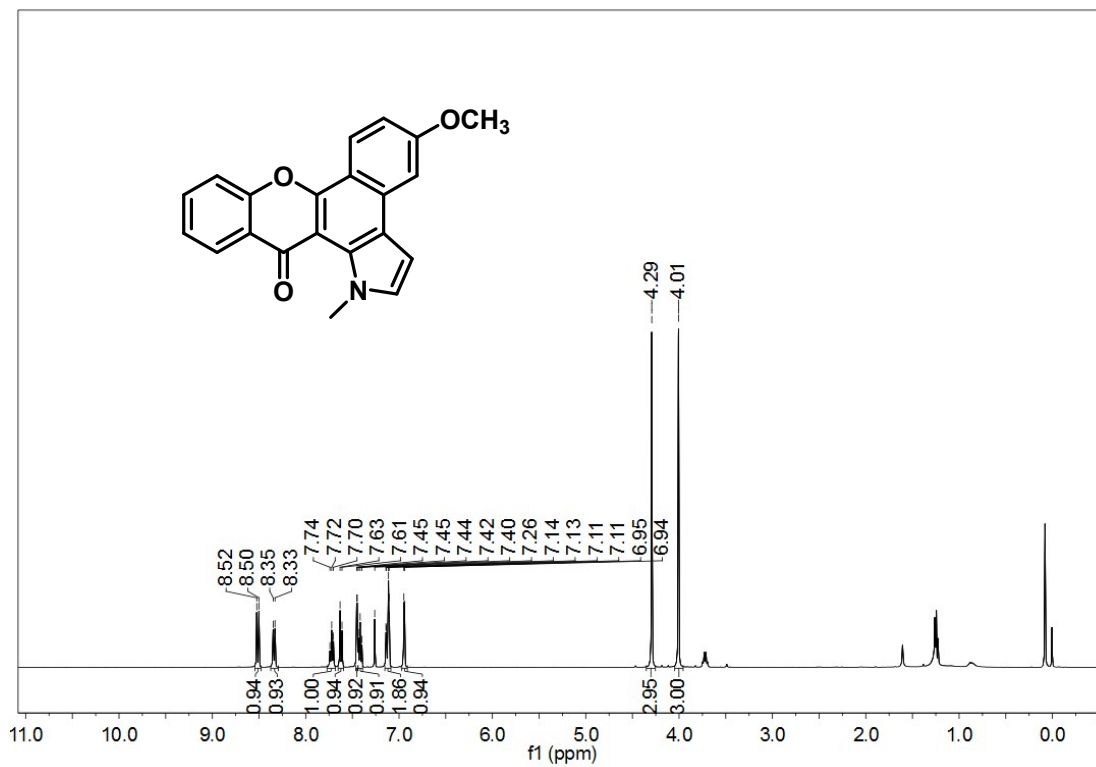

**Compound 3a** <sup>1</sup>H NMR(CDCl<sub>3</sub>)

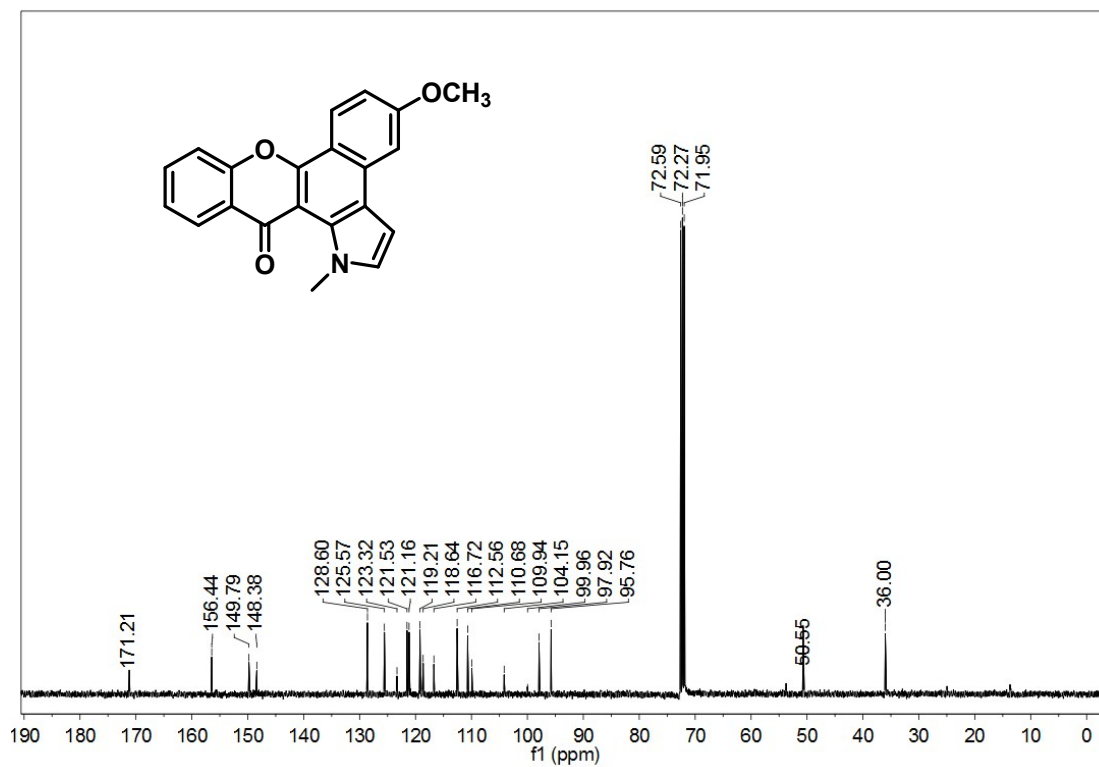

**Compound 3a** <sup>13</sup>C NMR (CDCl<sub>3</sub>)

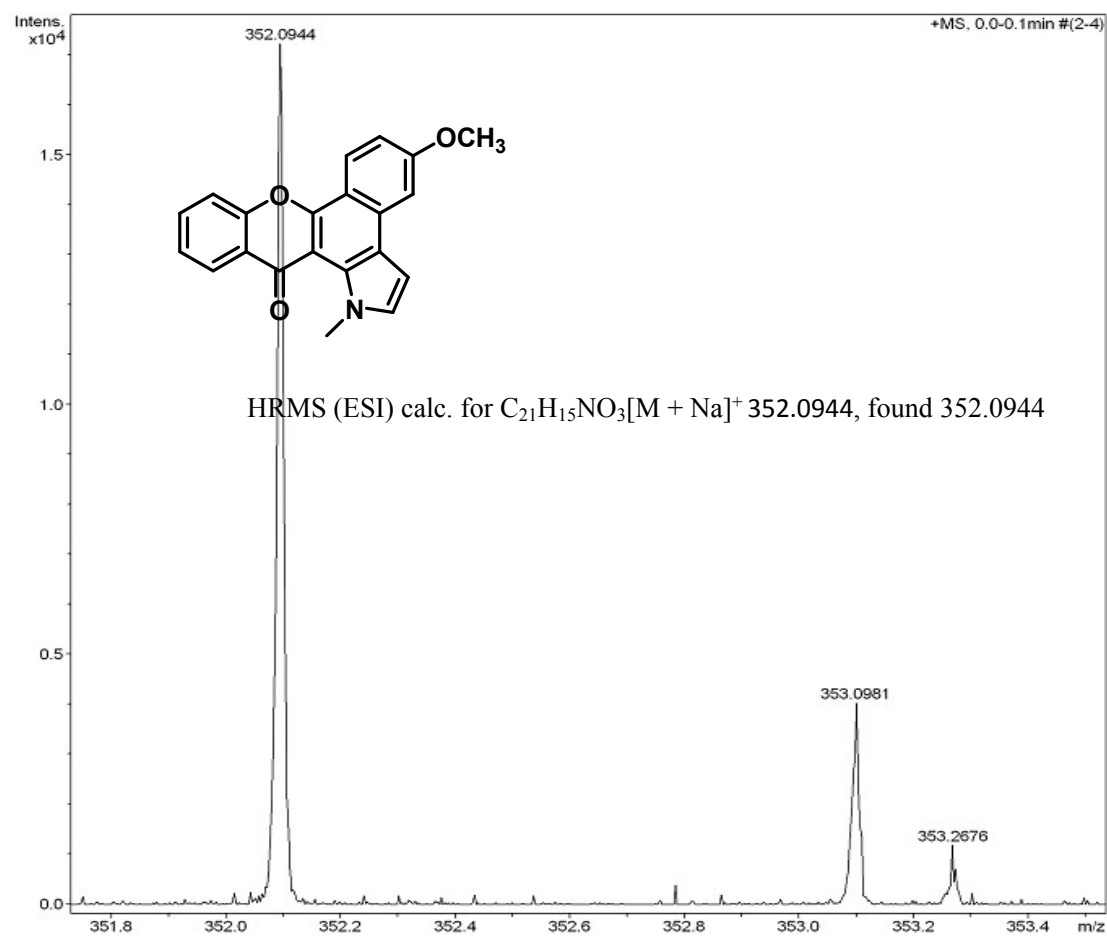

**Compound 3a** HRMS(MeOH)



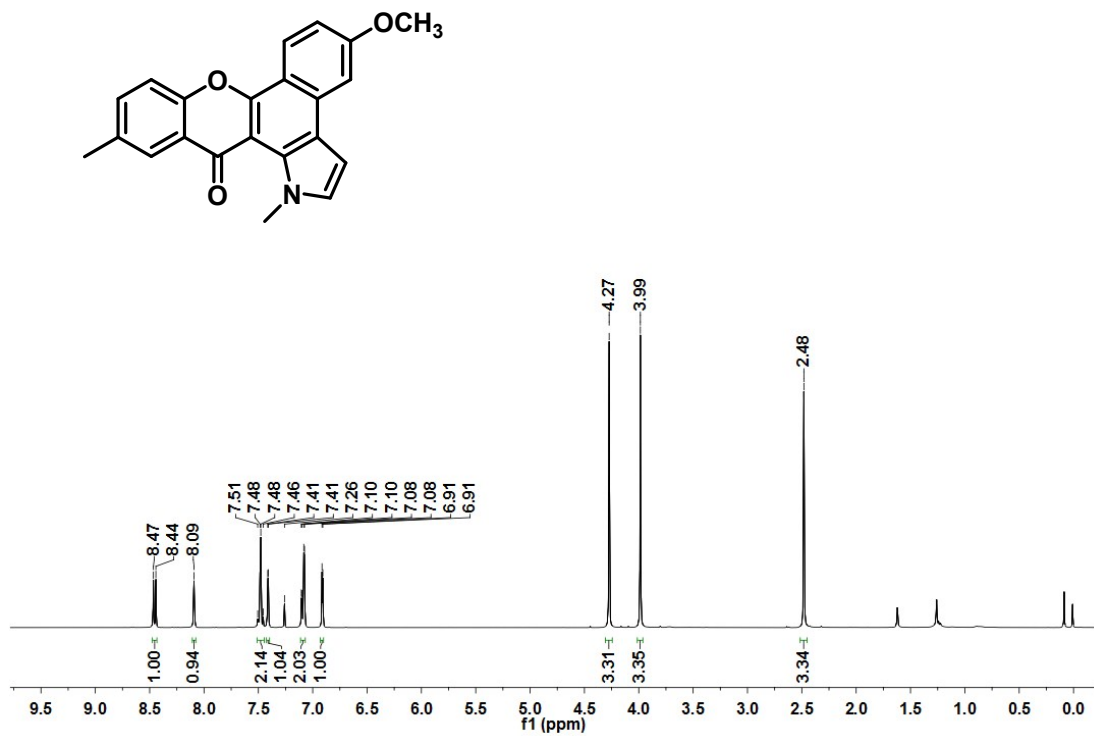

Compound 3b <sup>1</sup>H NMR(CDCl<sub>3</sub>)

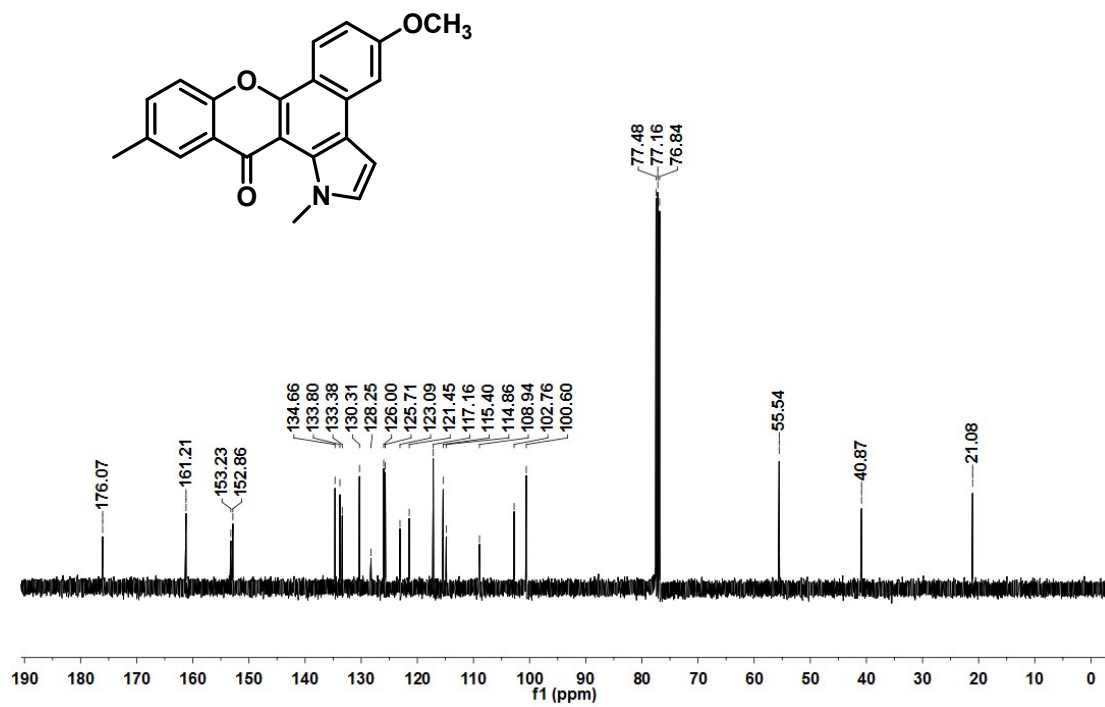

Compound 3b <sup>13</sup>C NMR (CDCl<sub>3</sub>)

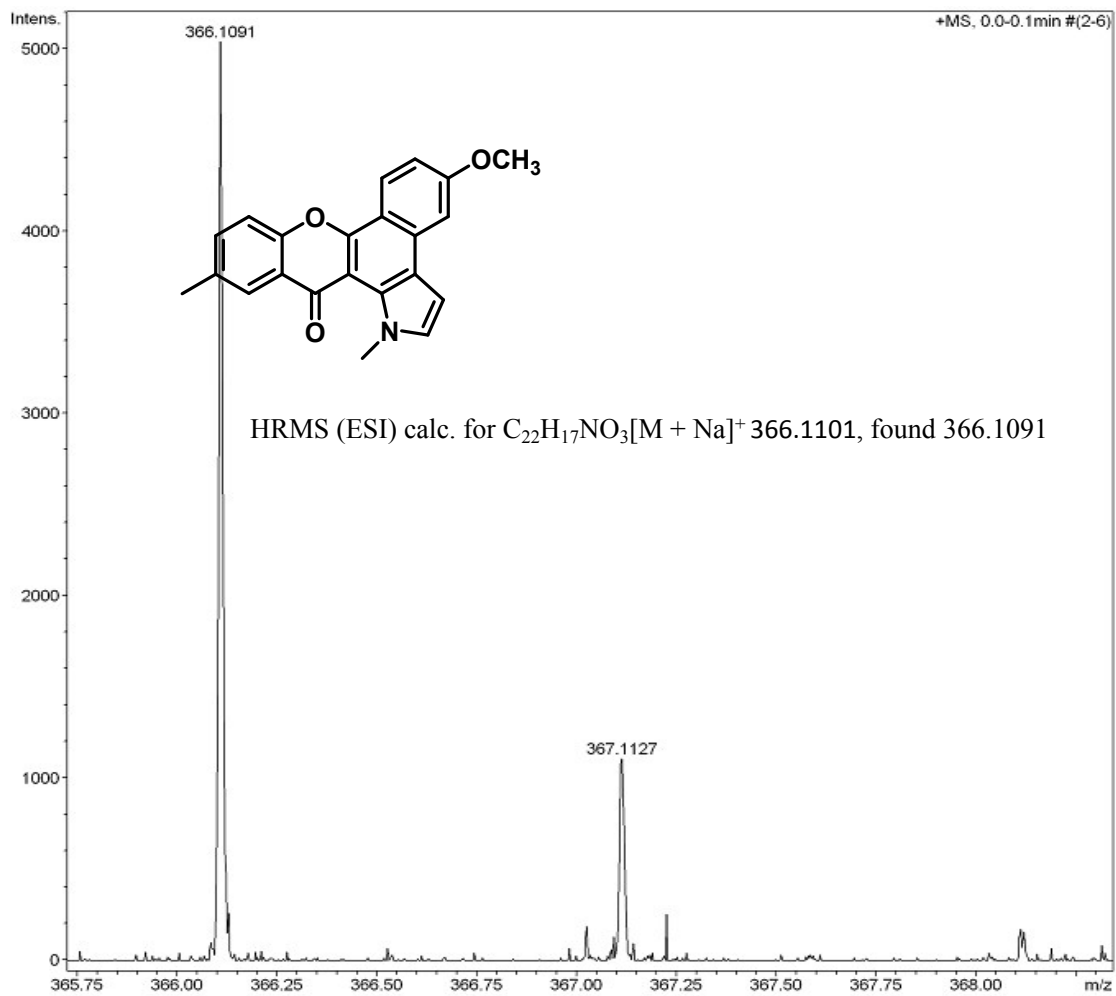

Compound 3b HRMS(MeOH)

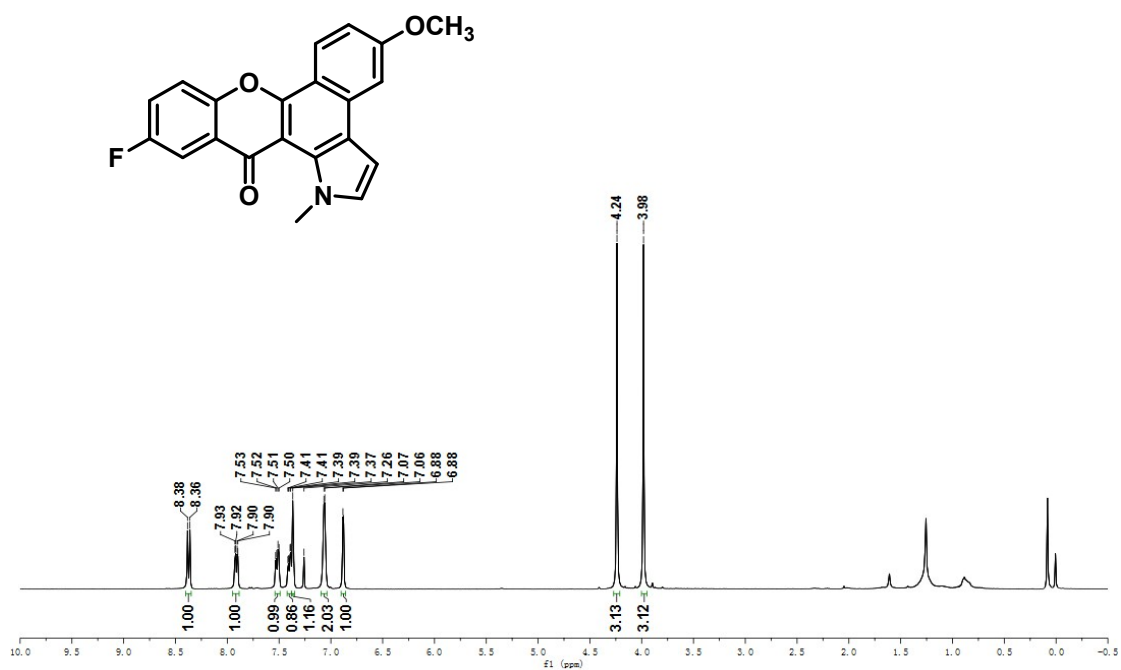

Compound 3c  $^1H$  NMR(CDCl<sub>3</sub>)

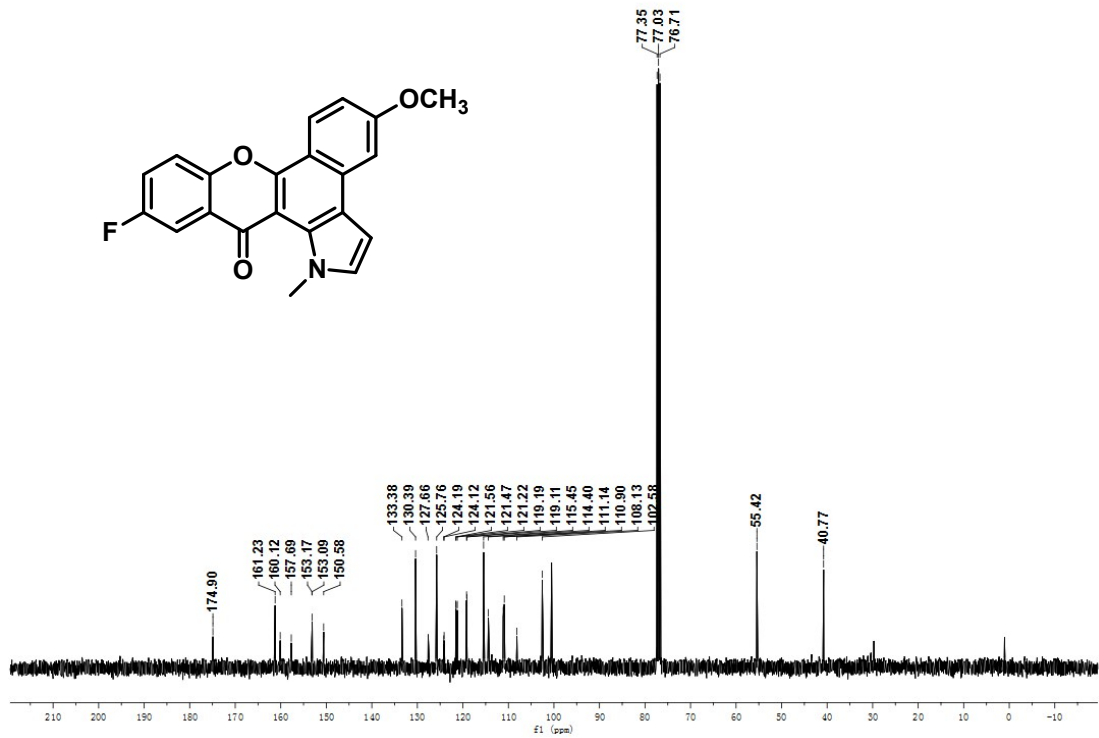

Compound 3c

<sup>13</sup>C NMR (CDCl<sub>3</sub>)

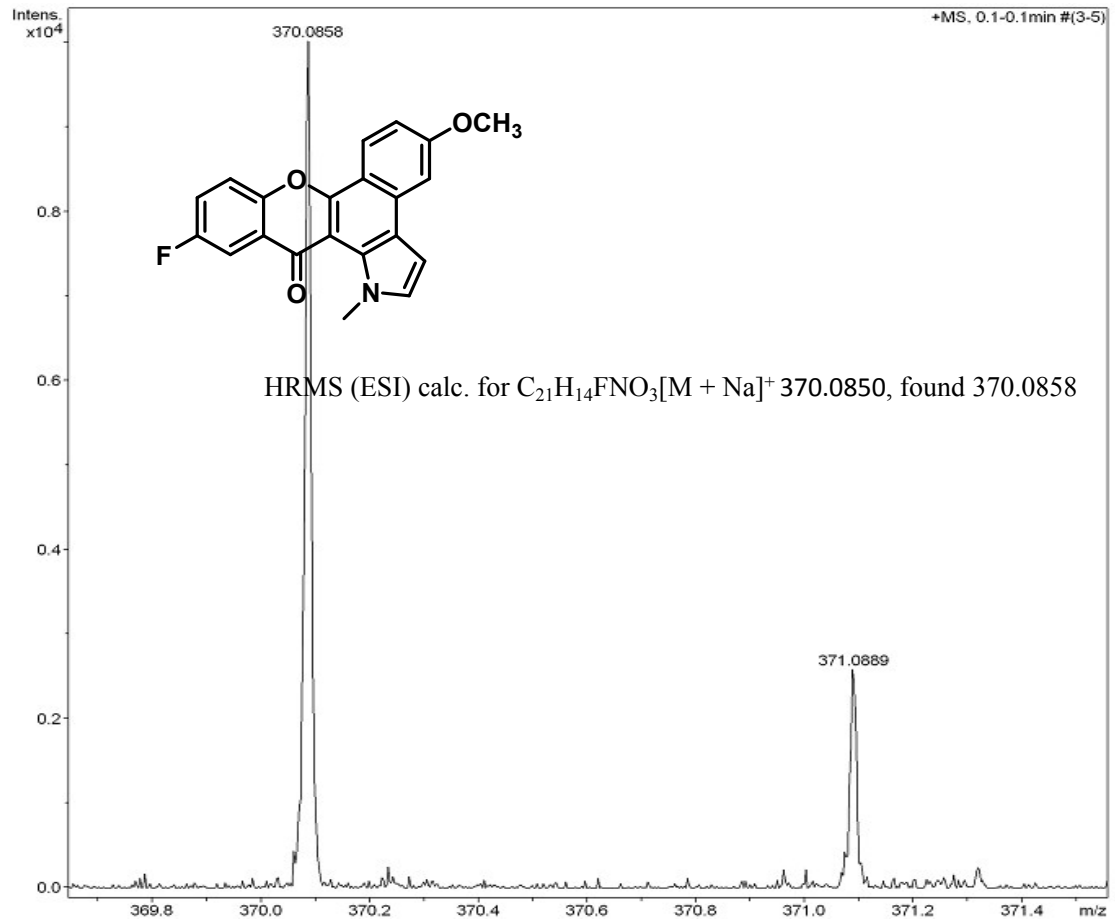

Compound 3c

HRMS(MeOH)

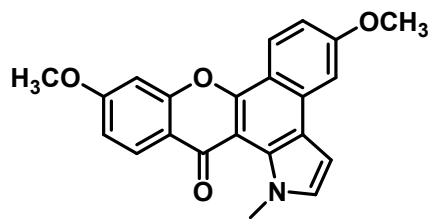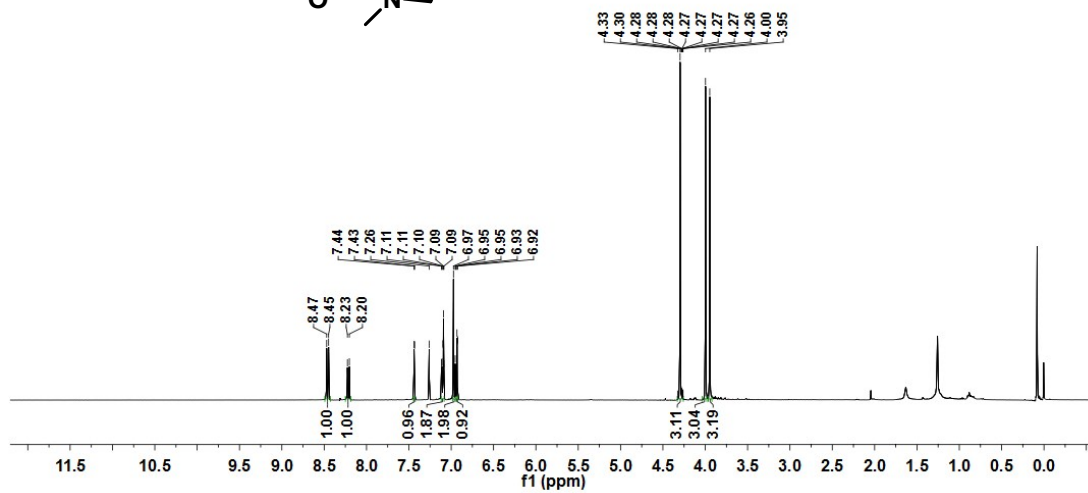

Compound 3d  $^1\text{H NMR}(\text{CDCl}_3)$

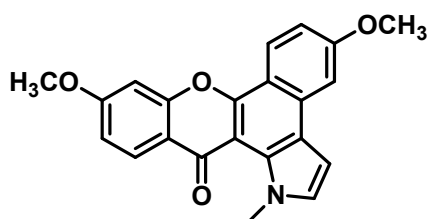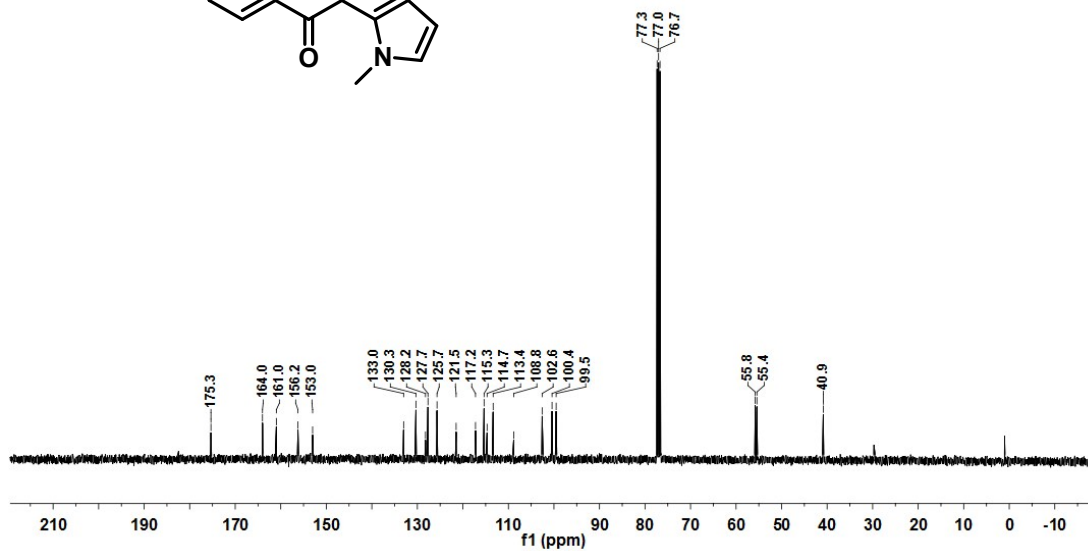

Compound 3d  $^{13}\text{C NMR}(\text{CDCl}_3)$

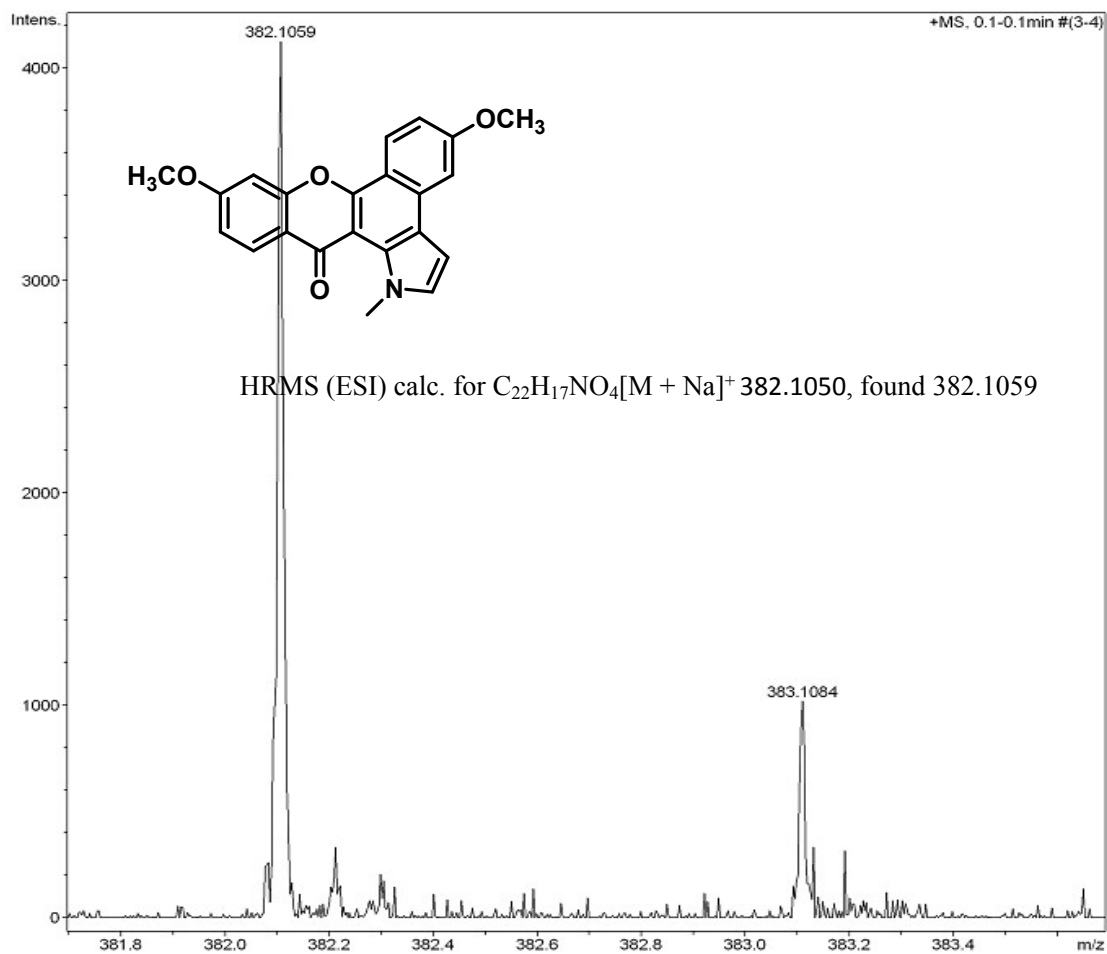

Compound 3d HRMS(MeOH)

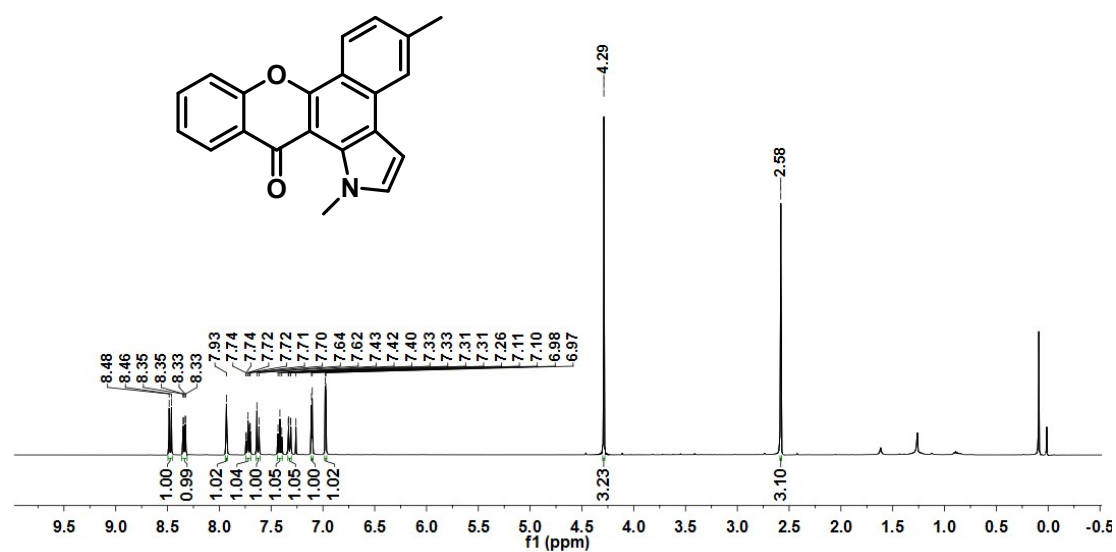

Compound 3e  $^1H$  NMR( $CDCl_3$ )

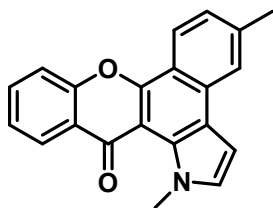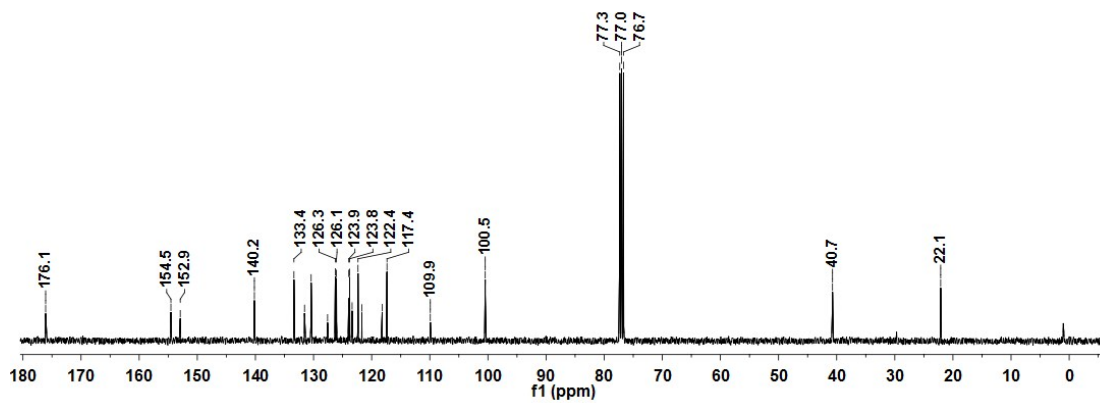

Compound 3e  $^{13}\text{C}$  NMR ( $\text{CDCl}_3$ )

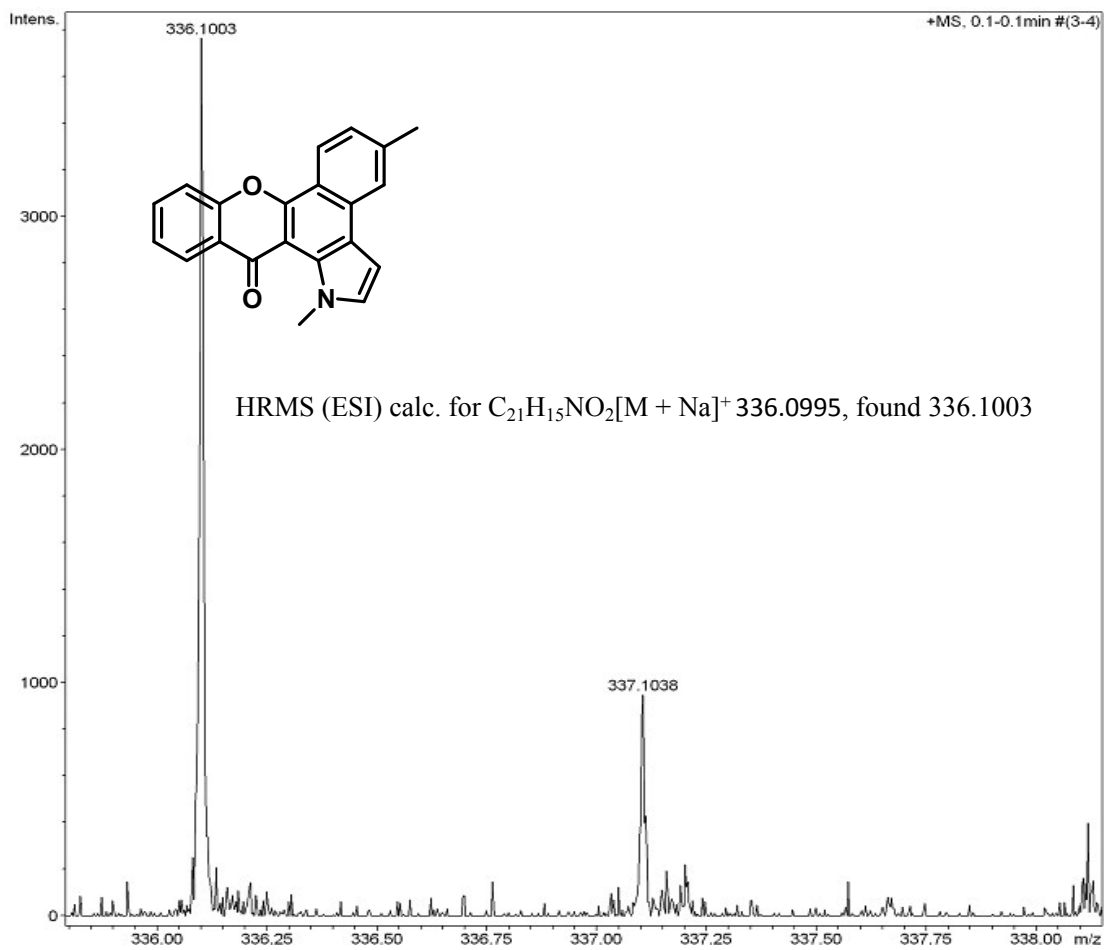

Compound 3e HRMS(MeOH)

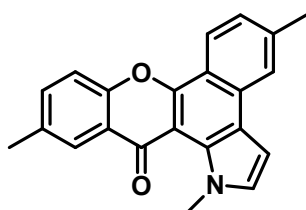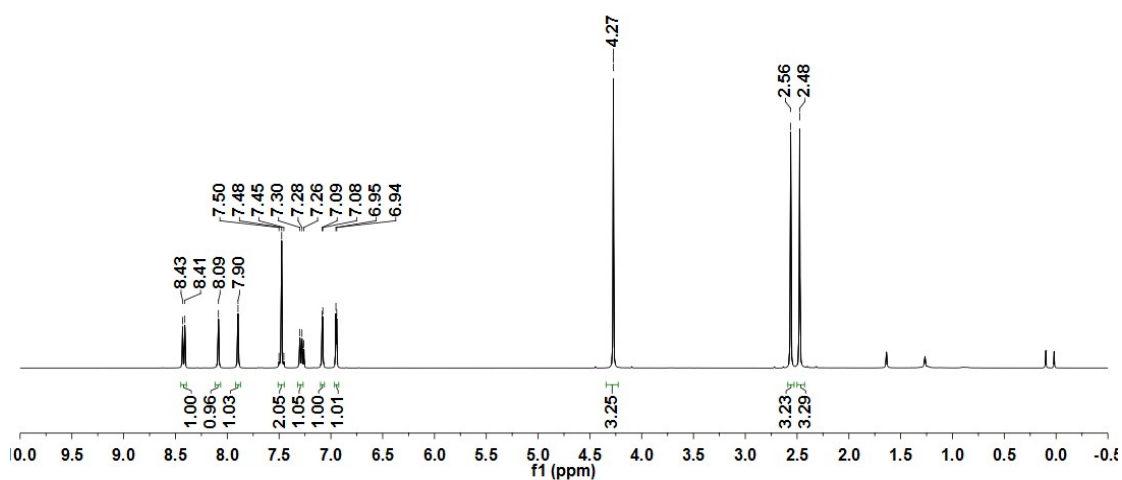

Compound 3f  $^1\text{H NMR}(\text{CDCl}_3)$

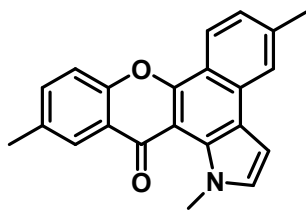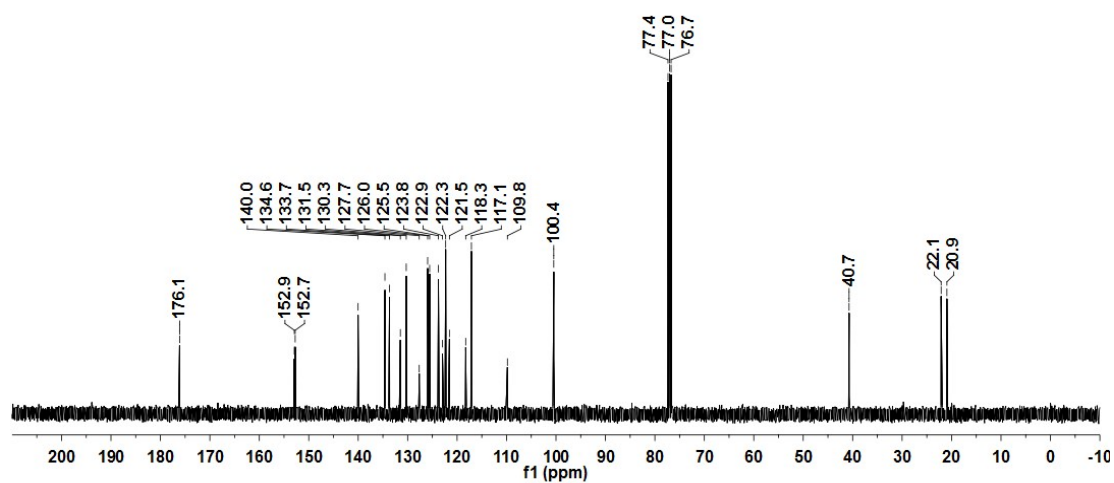

Compound 3f  $^{13}\text{C NMR}(\text{CDCl}_3)$

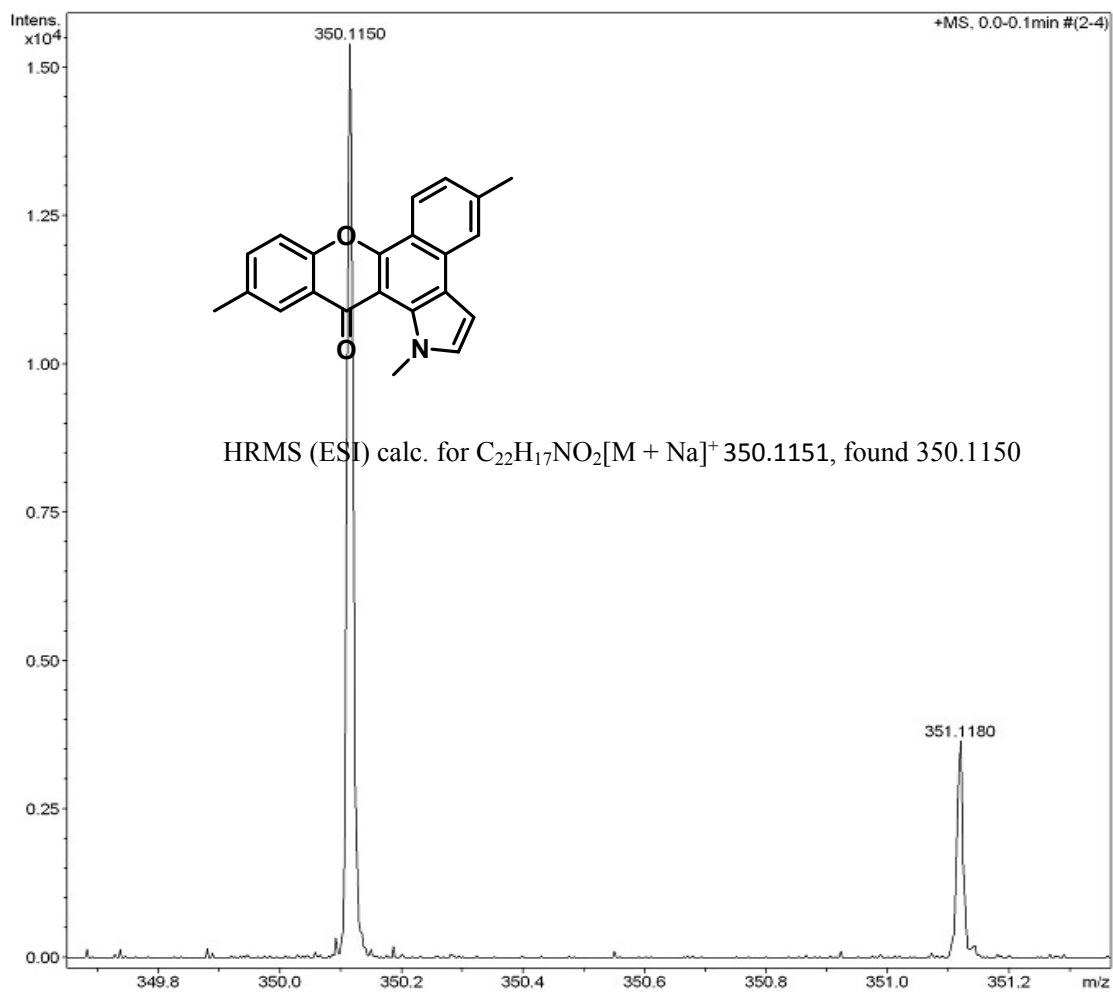

Compound 3f HRMS(MeOH)

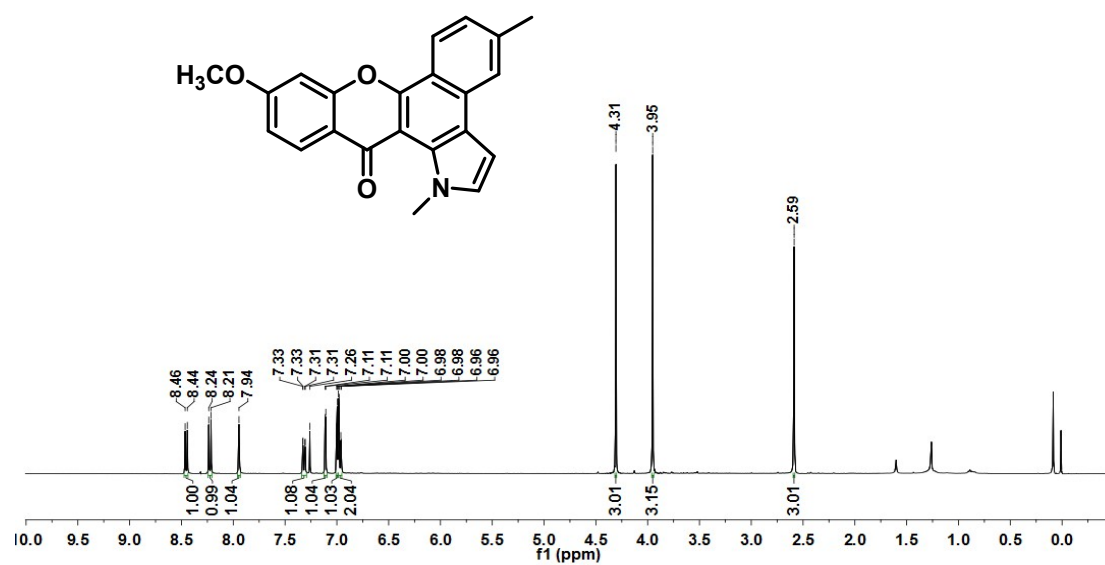

Compound 3g  $^1H$  NMR( $CDCl_3$ )



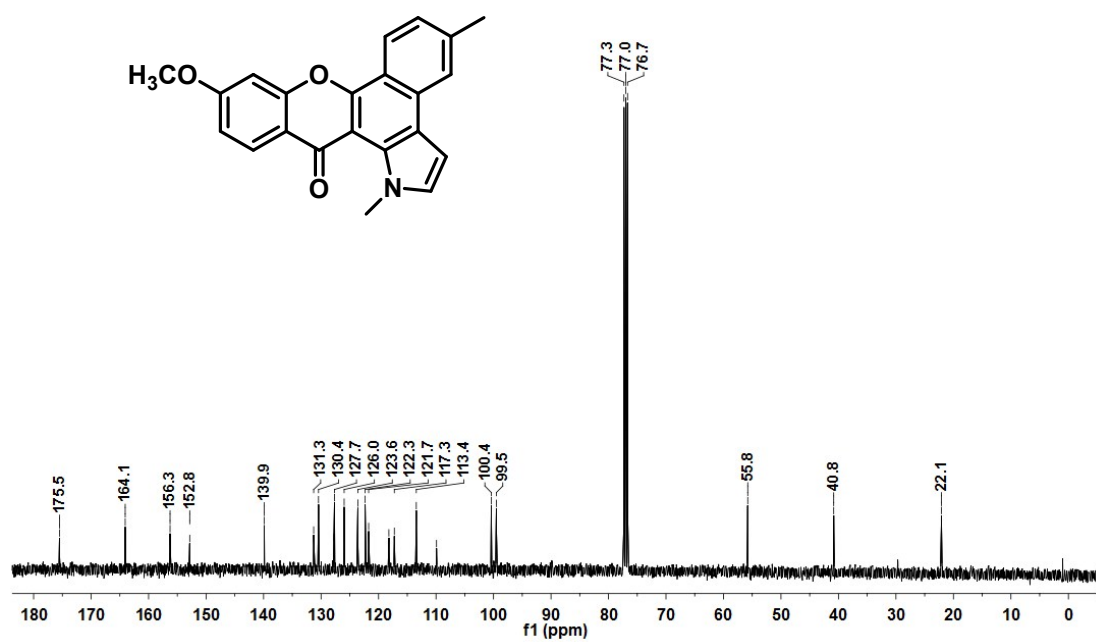

Compound 3g <sup>13</sup>C NMR (CDCl<sub>3</sub>)

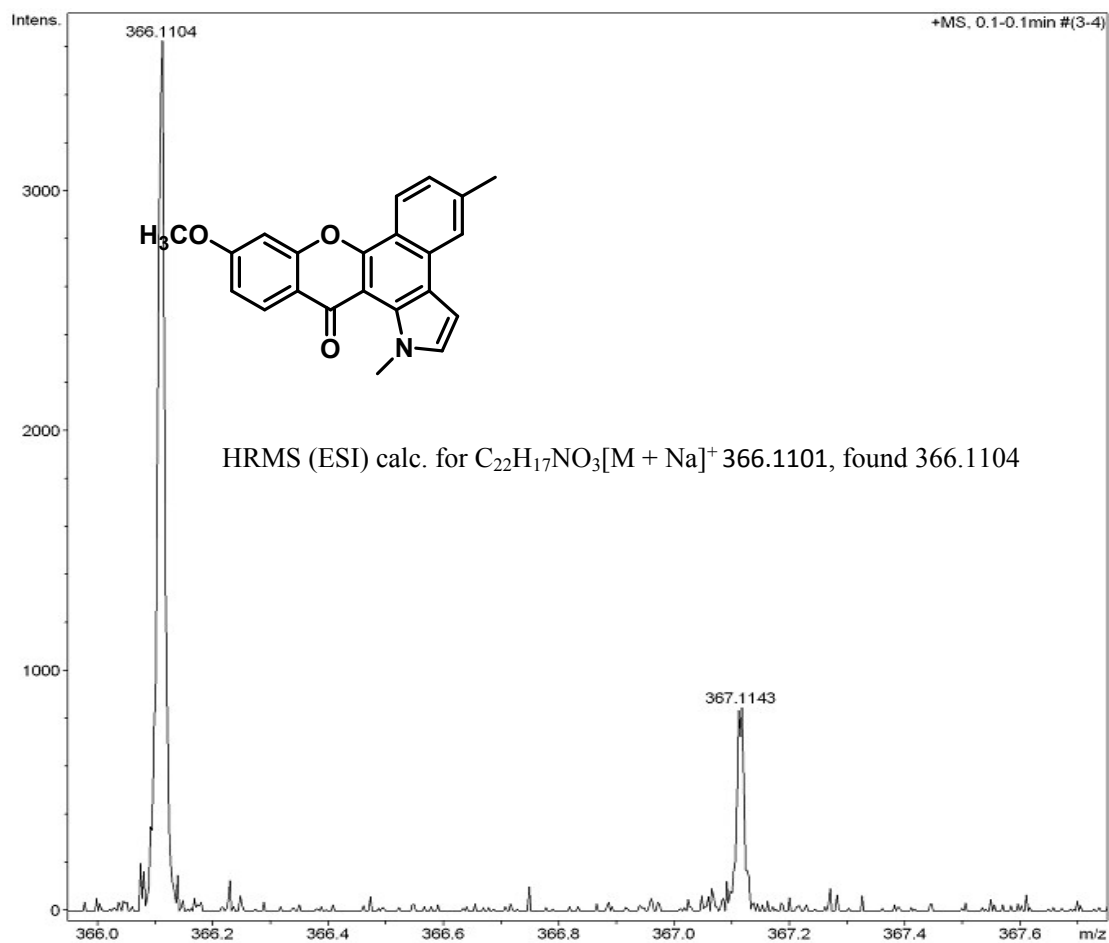

Compound 3g HRMS(MeOH)

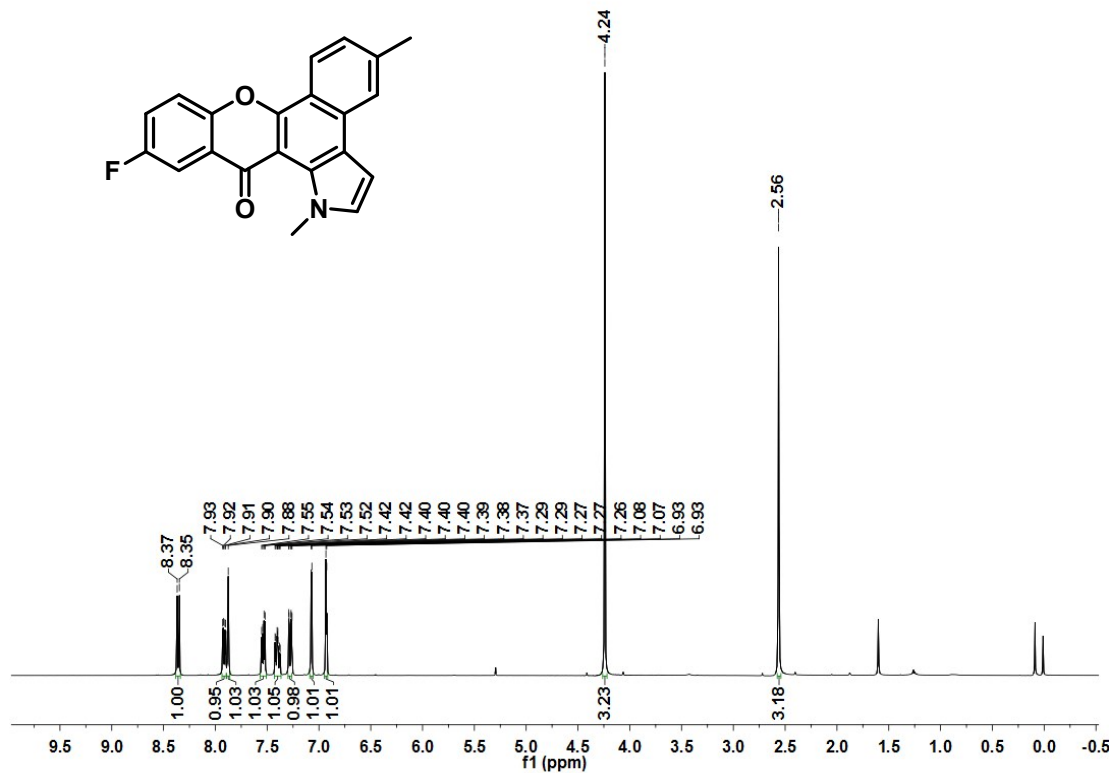

**Compound 3h**  $^1\text{H NMR}(\text{CDCl}_3)$

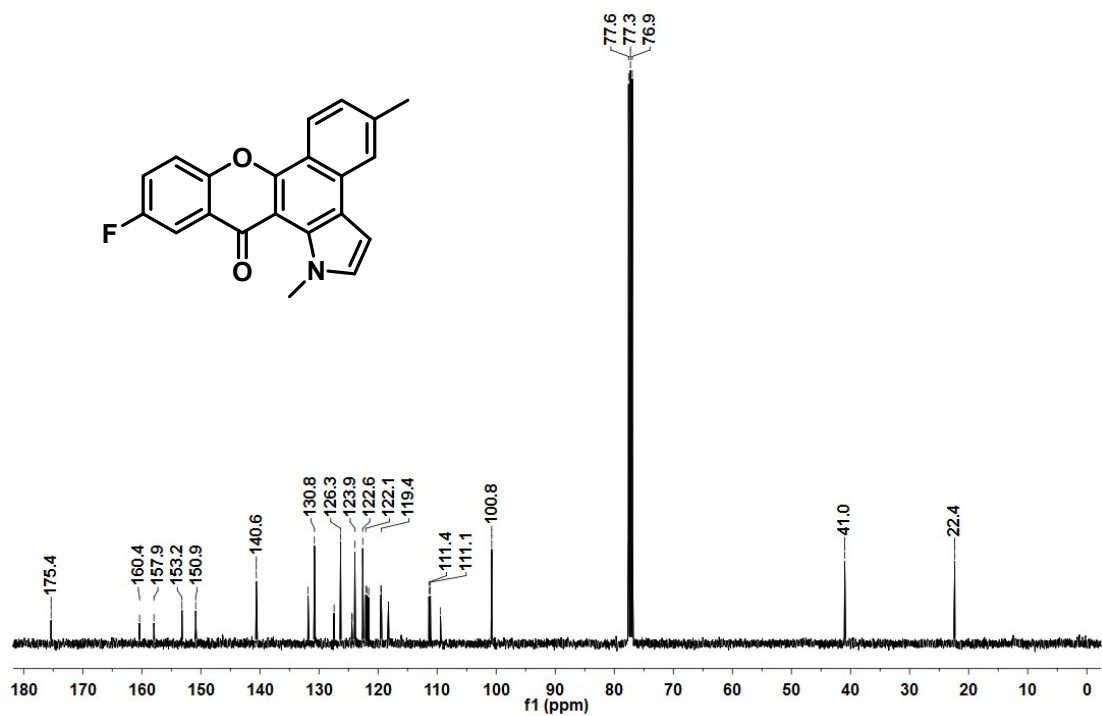

**Compound 3h**  $^{13}\text{C NMR}(\text{CDCl}_3)$

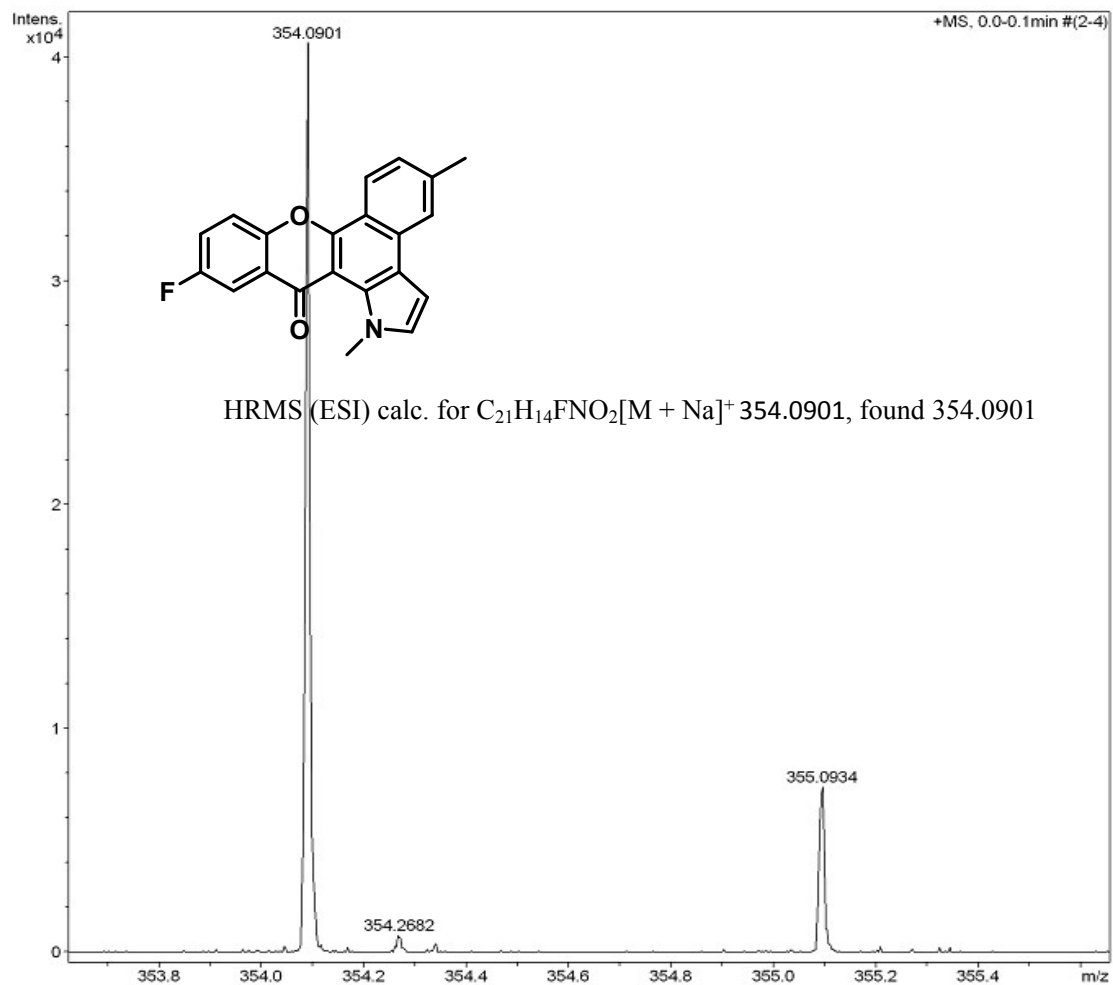

**Compound 3h** HRMS(MeOH)

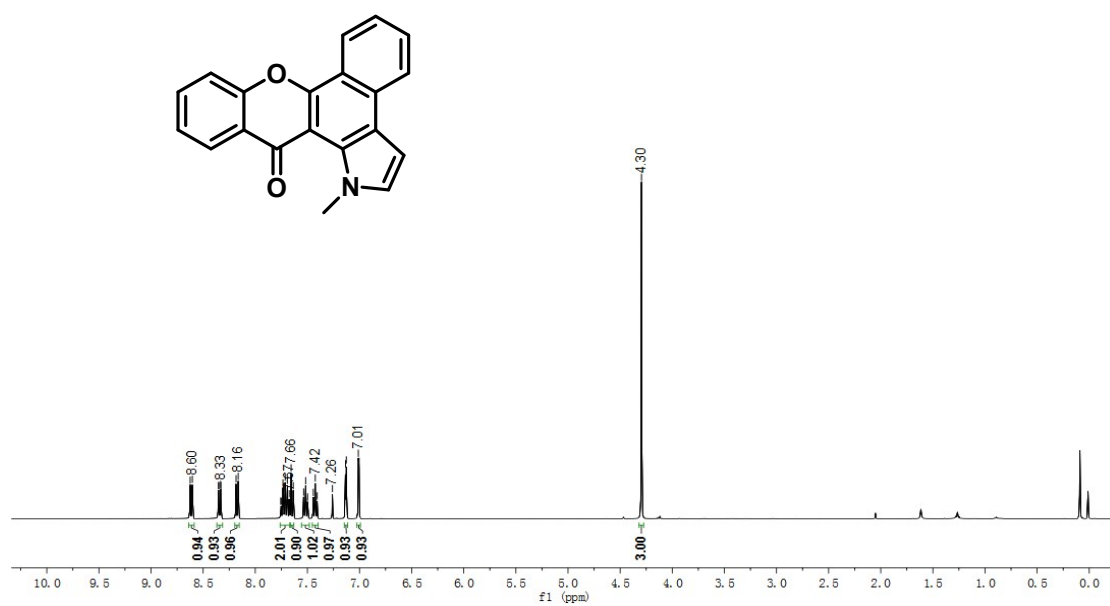

**Compound 3i**  $^1H$  NMR( $CDCl_3$ )

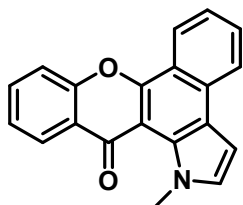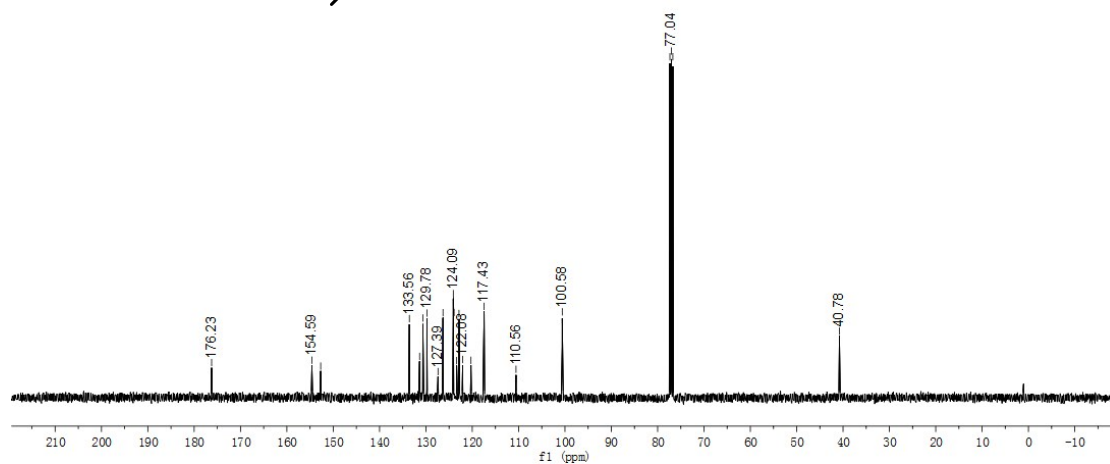

Compound 3i

$^{13}\text{C}$  NMR (CDCl<sub>3</sub>)

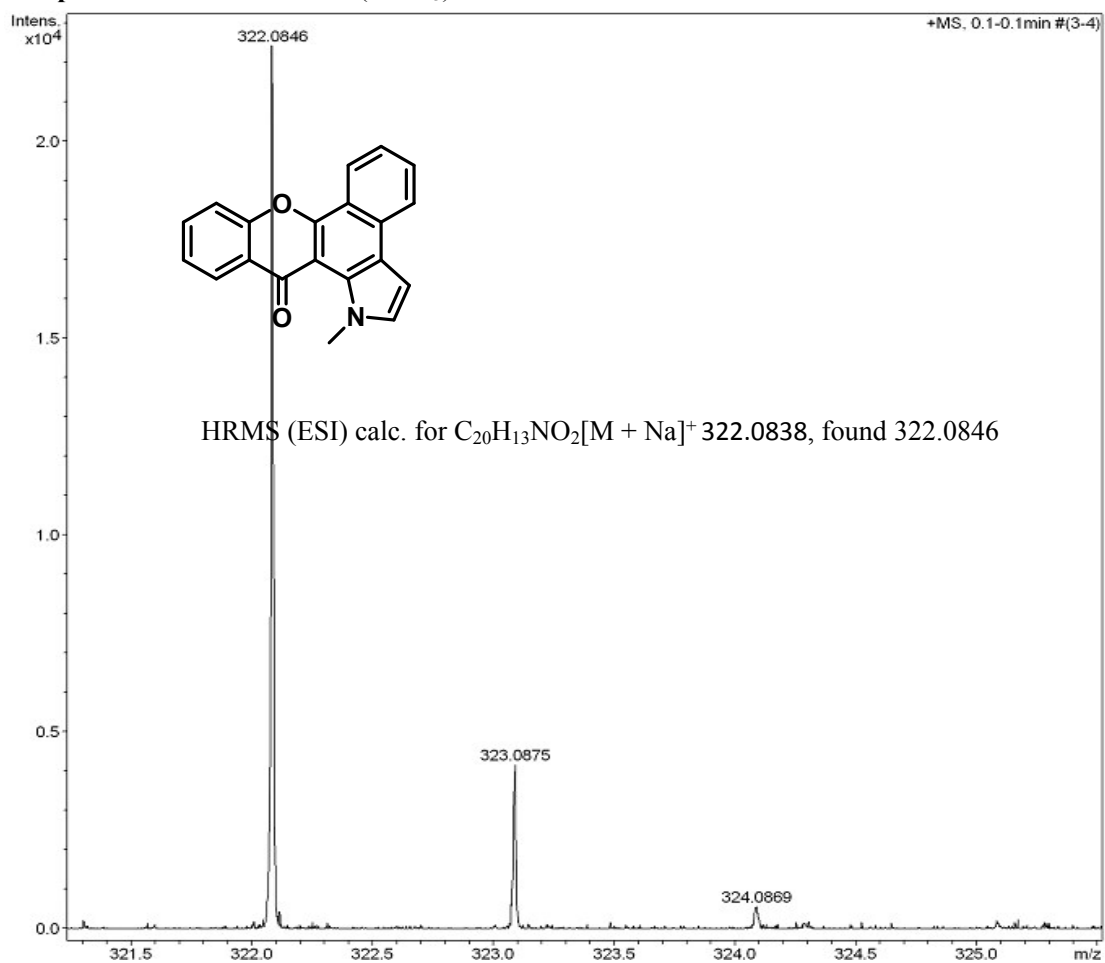

Compound 3i

HRMS(MeOH)

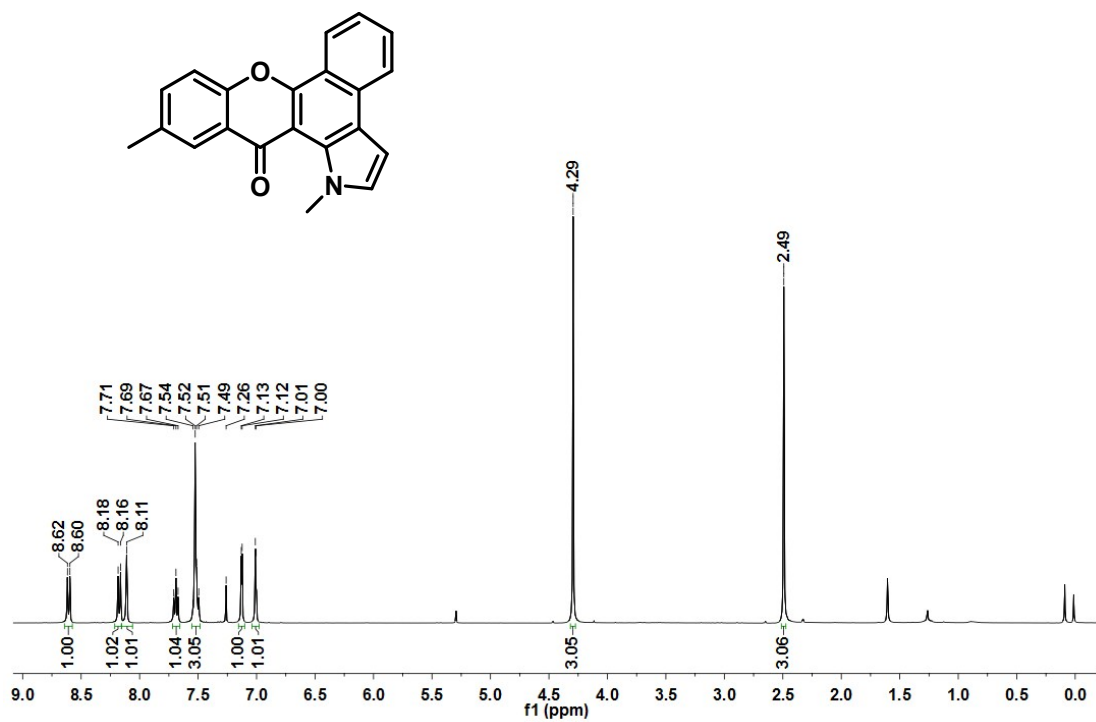

**Compound 3j**  $^1\text{H NMR}(\text{CDCl}_3)$

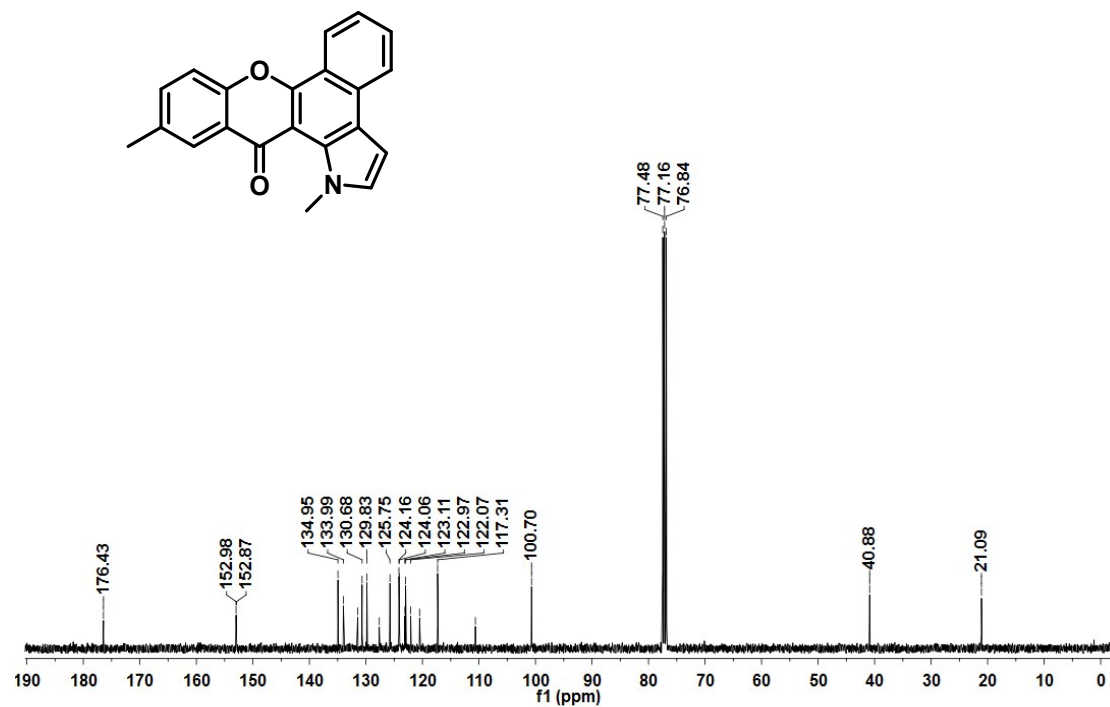

**Compound 3j**  $^{13}\text{C NMR}(\text{CDCl}_3)$

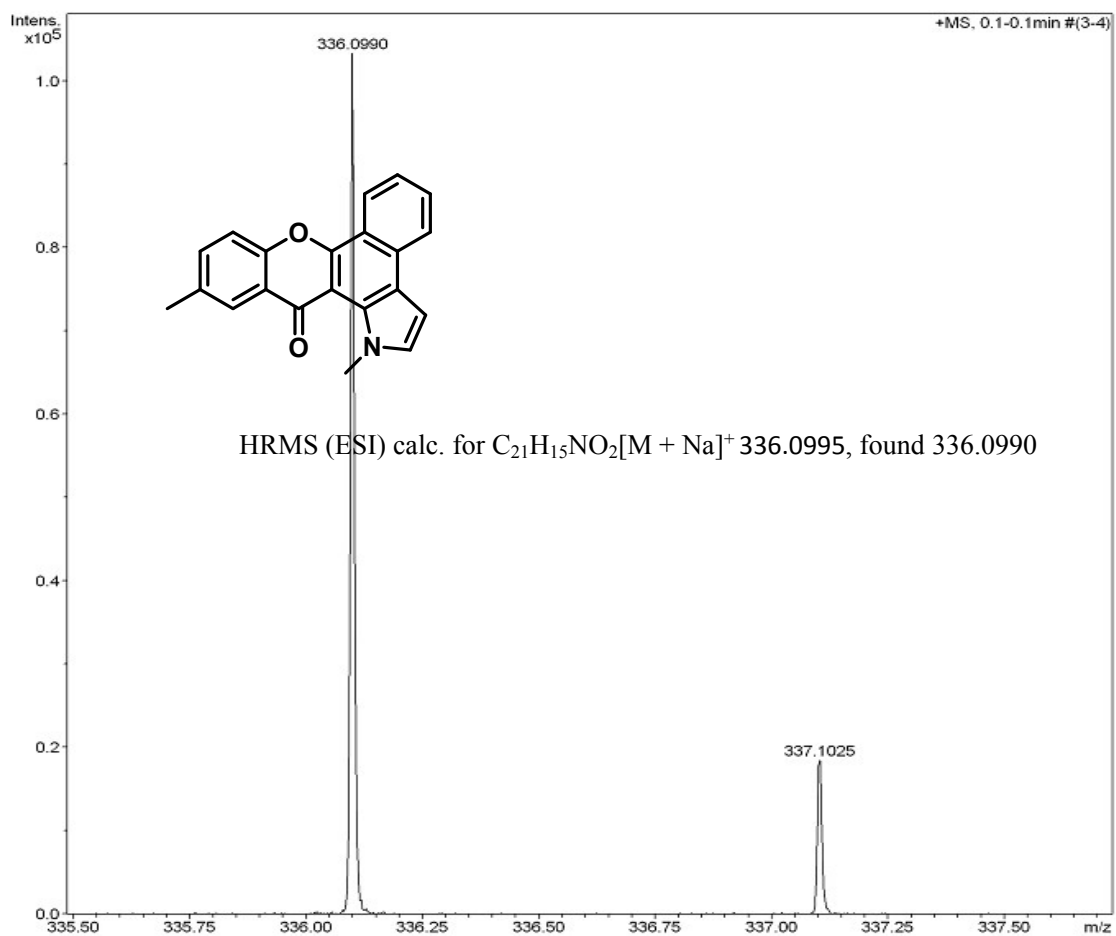

Compound 3j HRMS(MeOH)

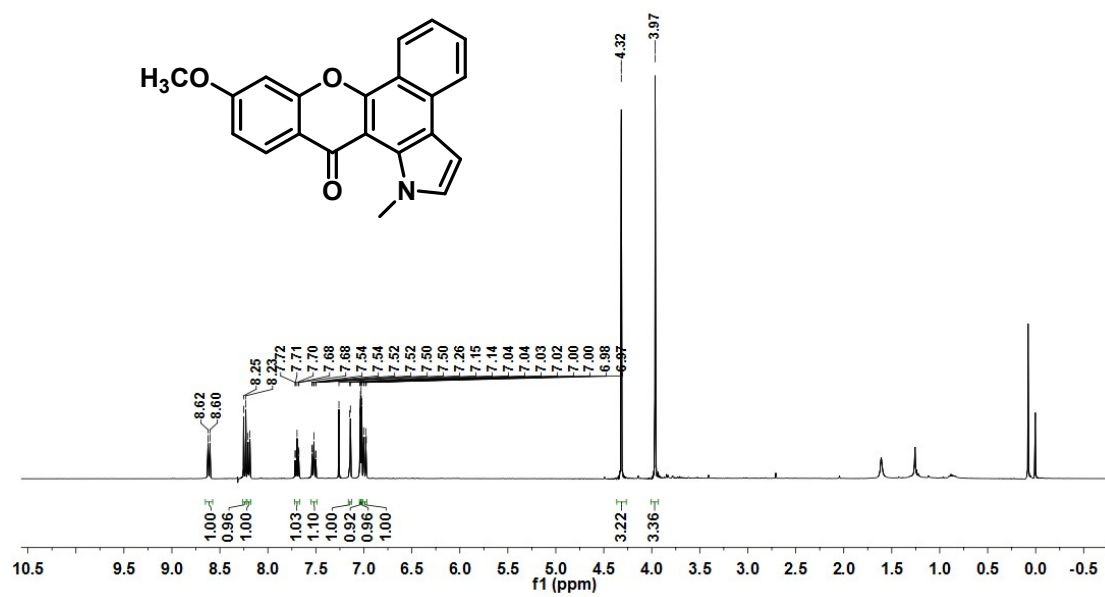

Compound 3k  $^1H$  NMR( $CDCl_3$ )

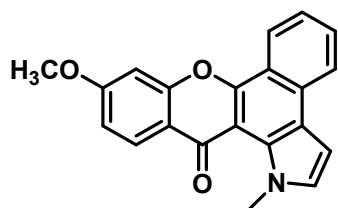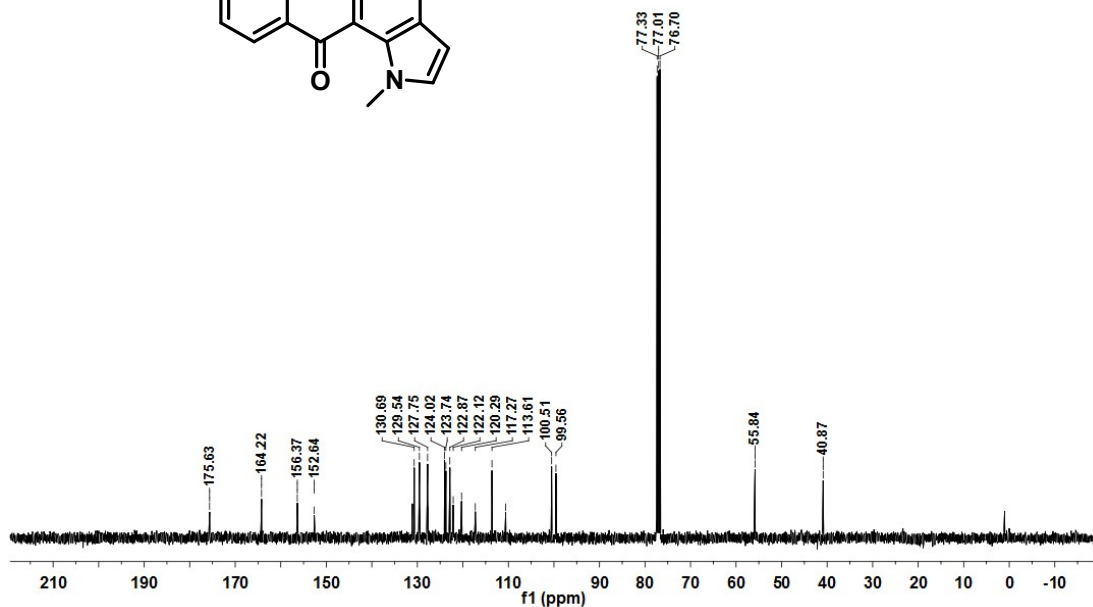

Compound 3k  $^{13}\text{C}$  NMR ( $\text{CDCl}_3$ )

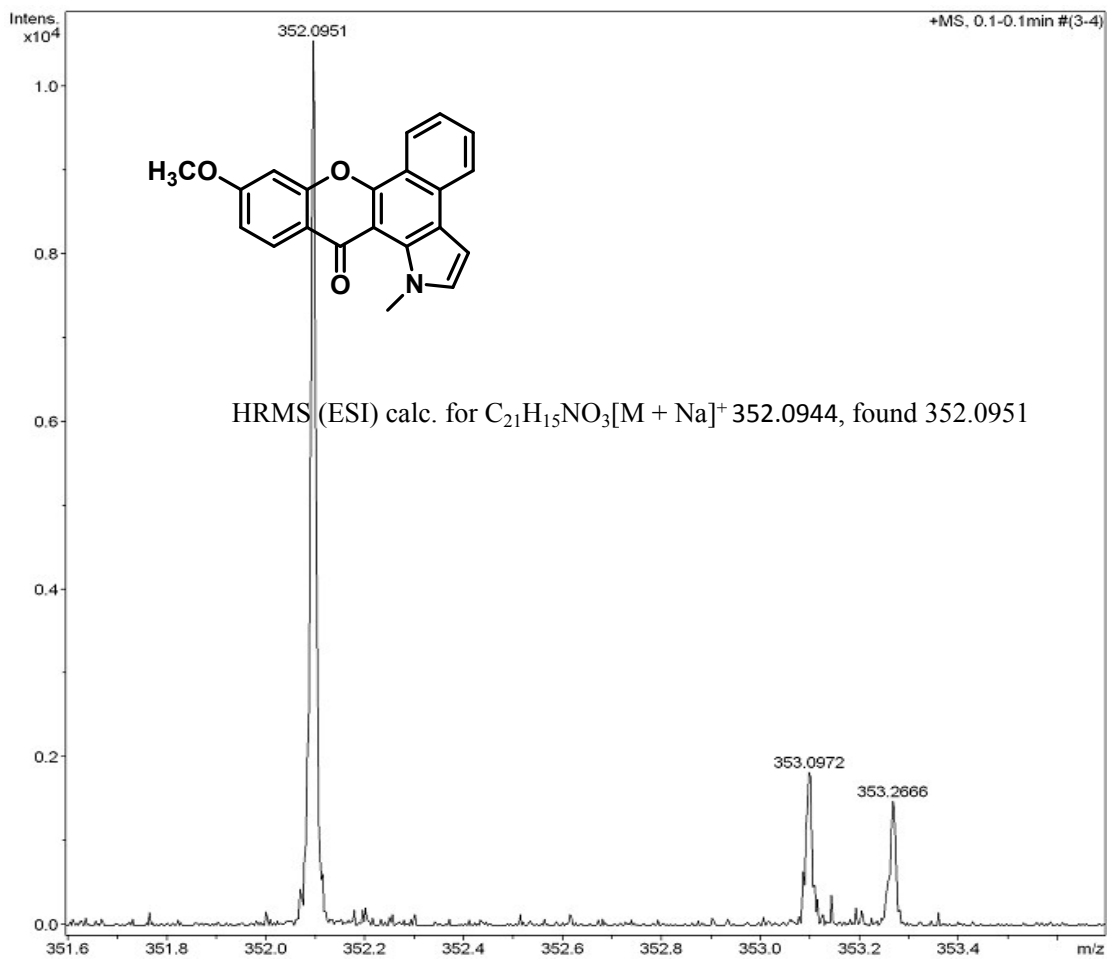

Compound 3k HRMS(MeOH)

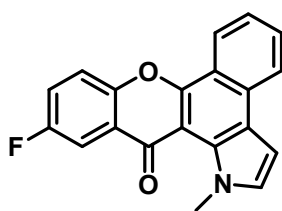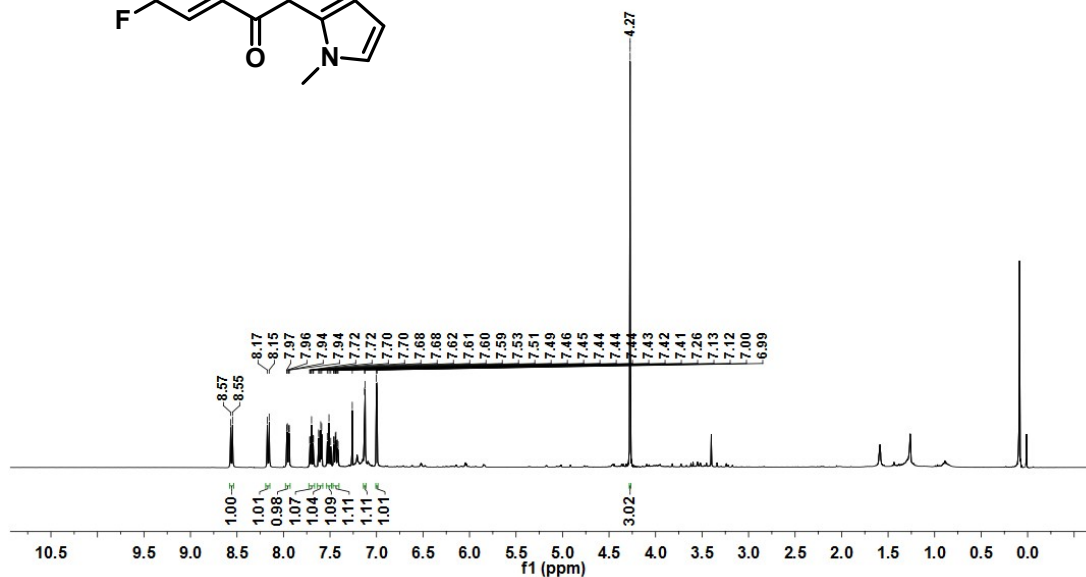

Compound 31  $^1\text{H NMR}(\text{CDCl}_3)$

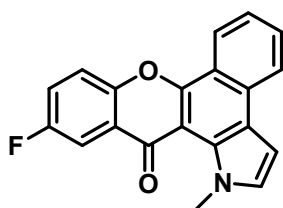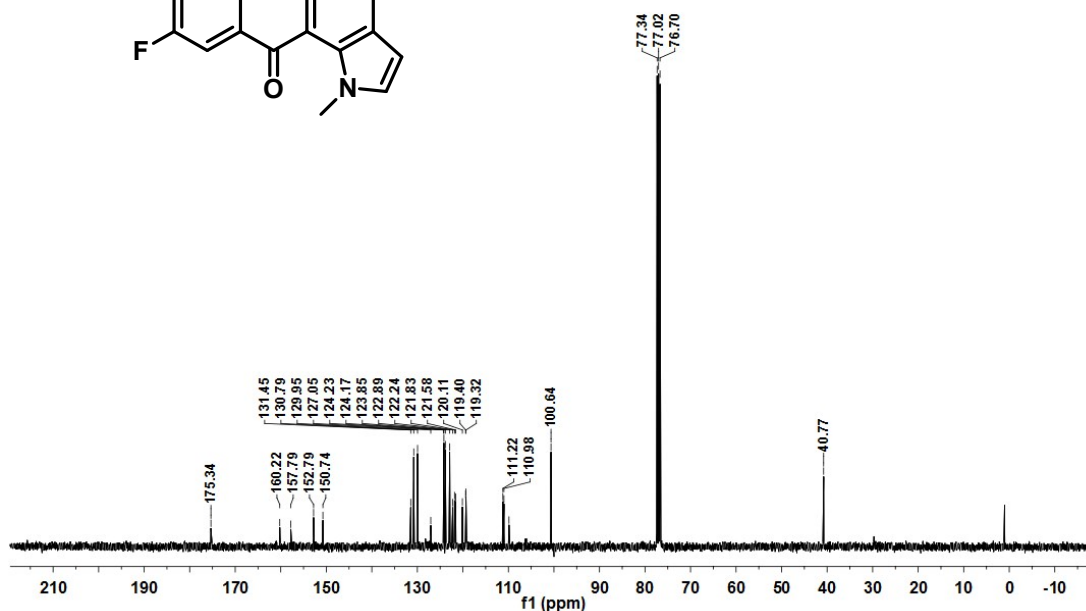

Compound 31  $^{13}\text{C NMR}(\text{CDCl}_3)$



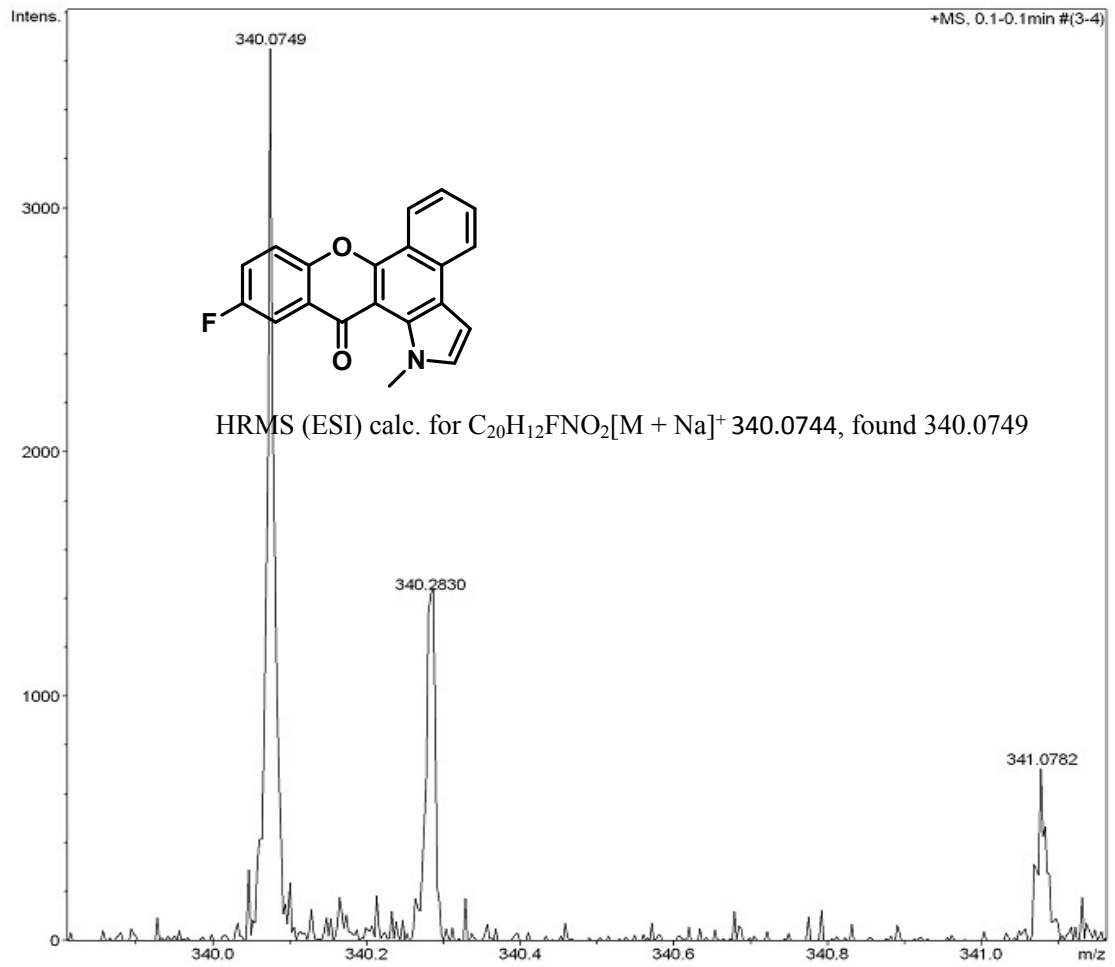

**Compound 31** HRMS(MeOH)

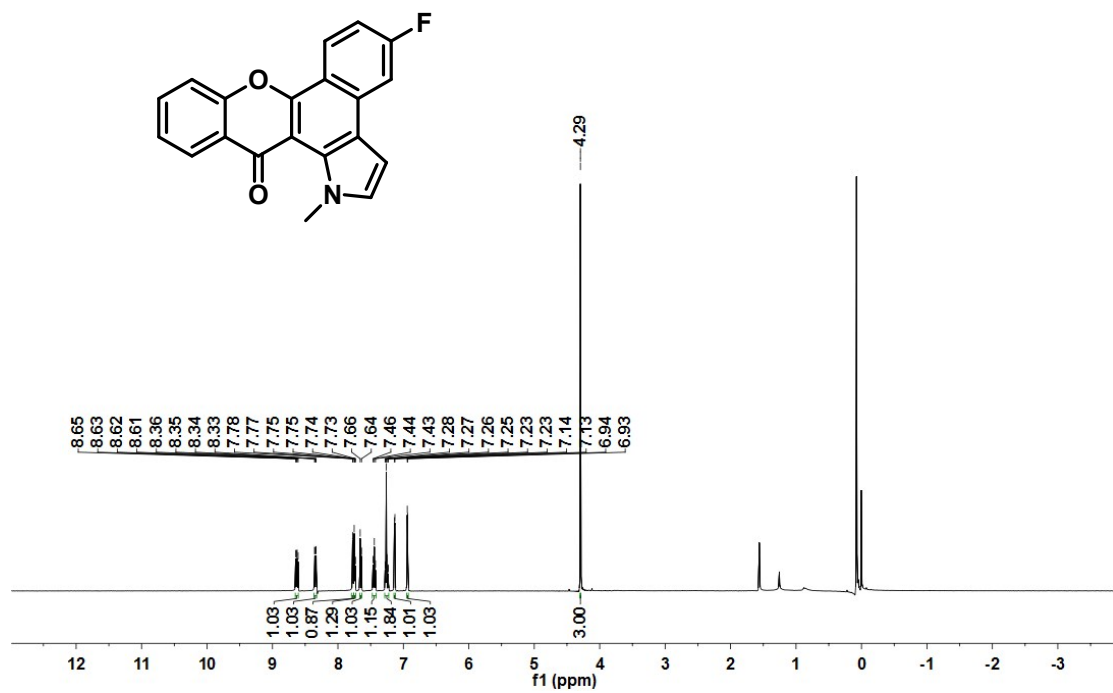

Compound 3m <sup>1</sup>H NMR(CDCl<sub>3</sub>)

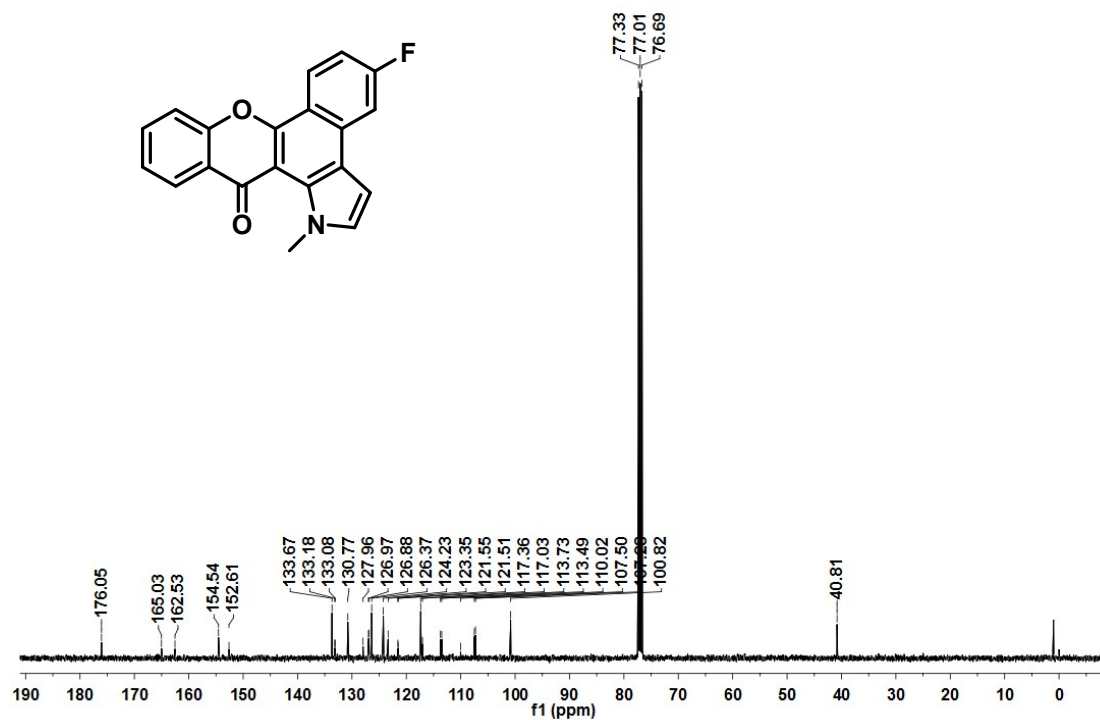

Compound 3m <sup>13</sup>C NMR (CDCl<sub>3</sub>)

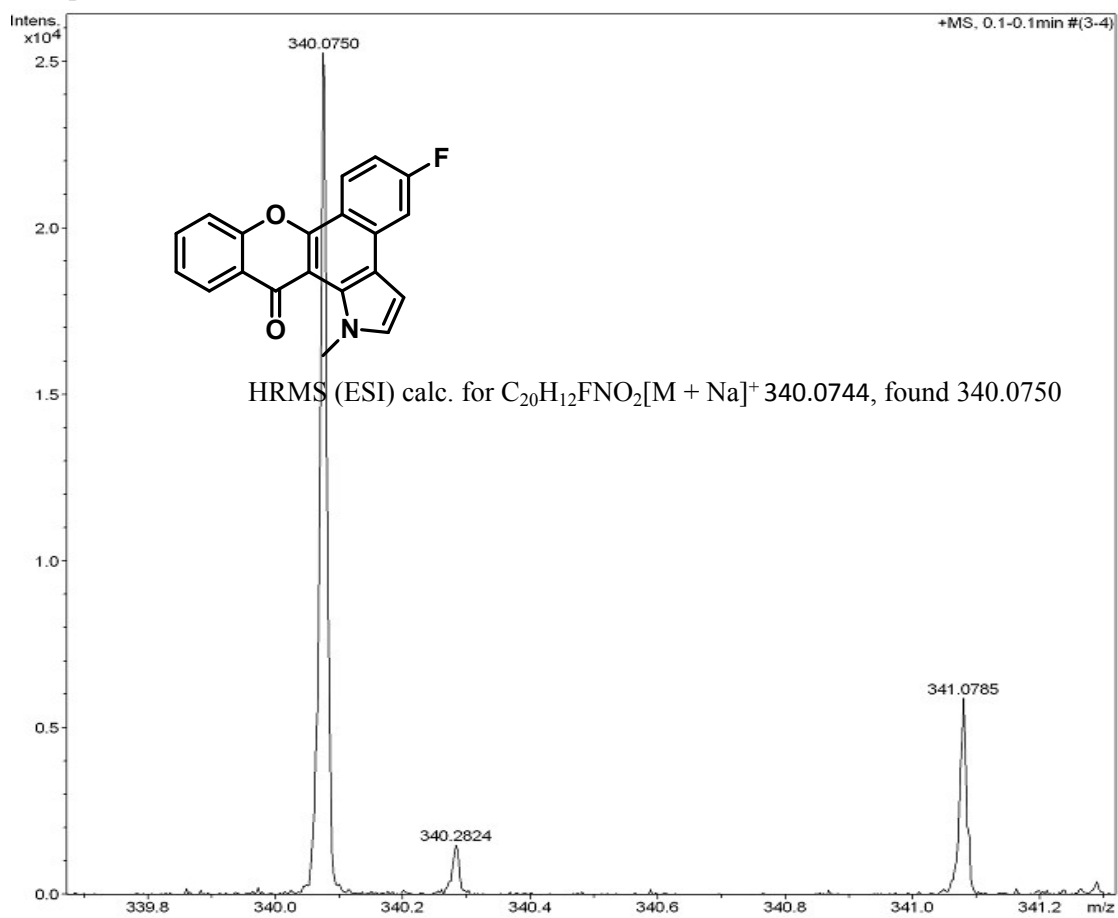

Compound 3m HRMS(MeOH)

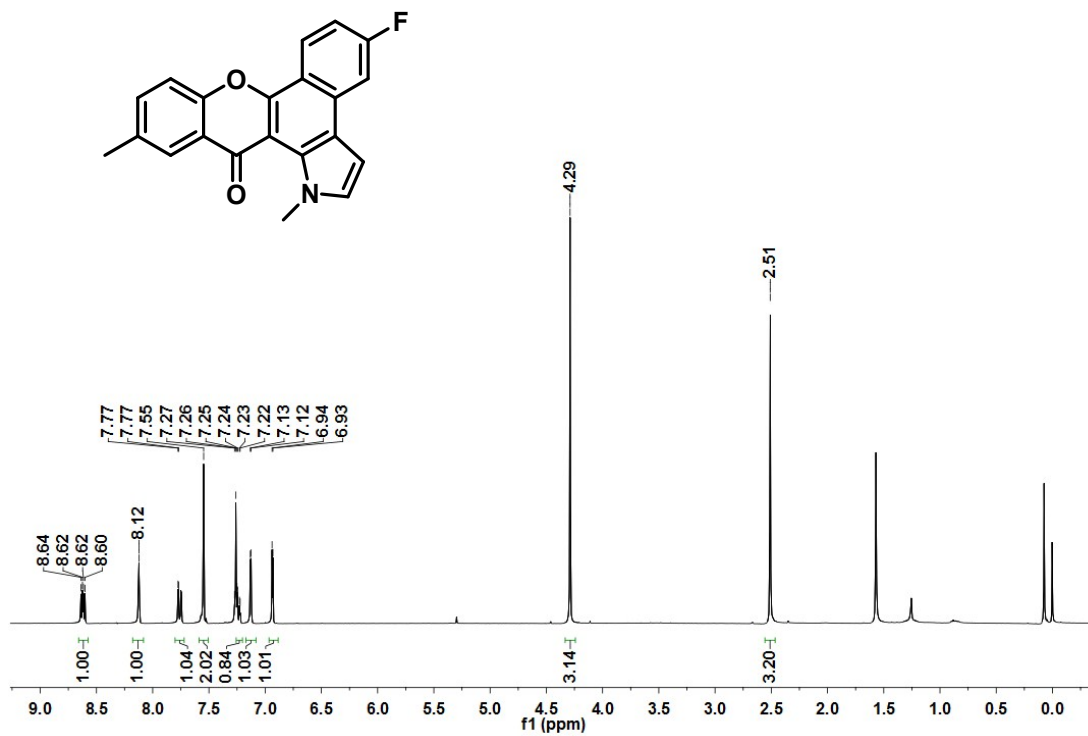

**Compound 3n**  $^1\text{H NMR}(\text{CDCl}_3)$

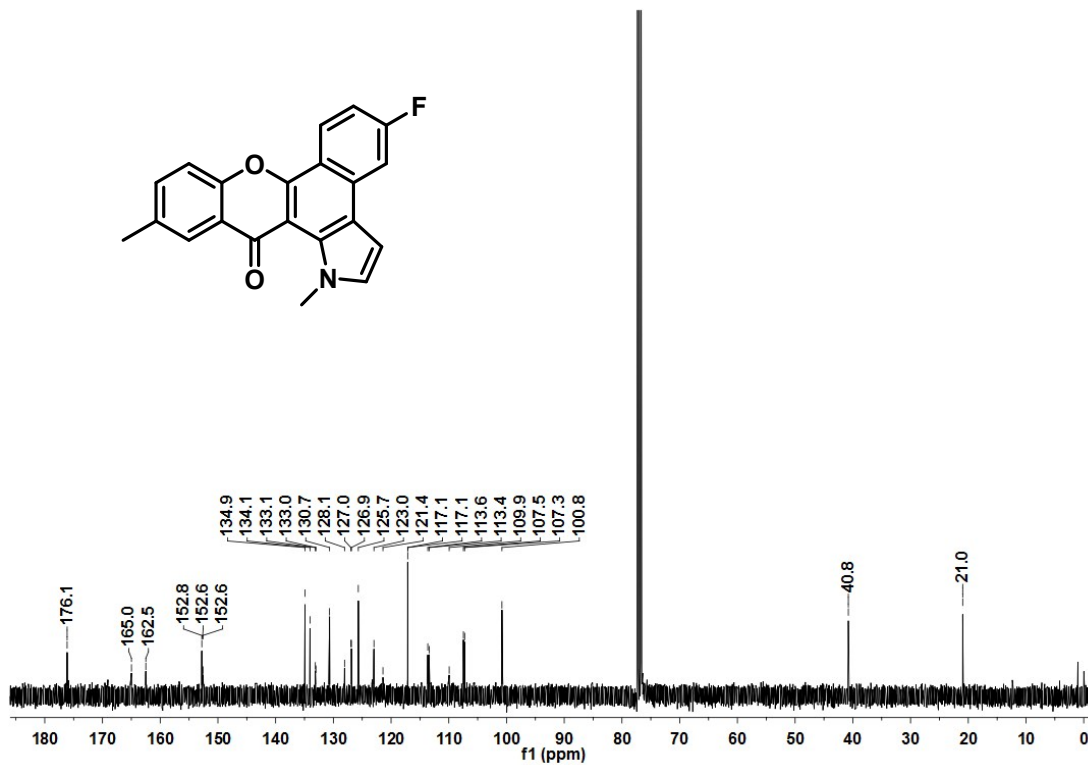

**Compound 3n**  $^{13}\text{C NMR}(\text{CDCl}_3)$

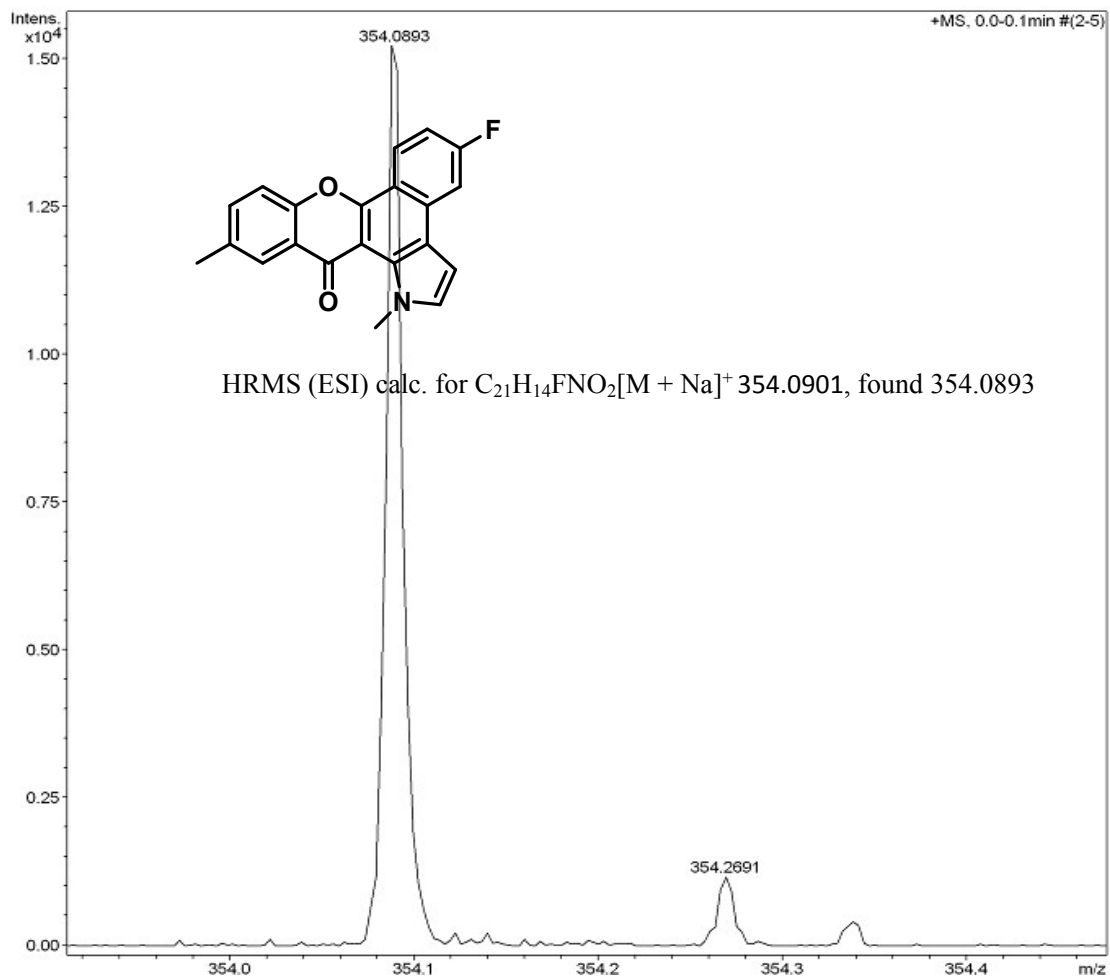

Compound 3n HRMS(MeOH)

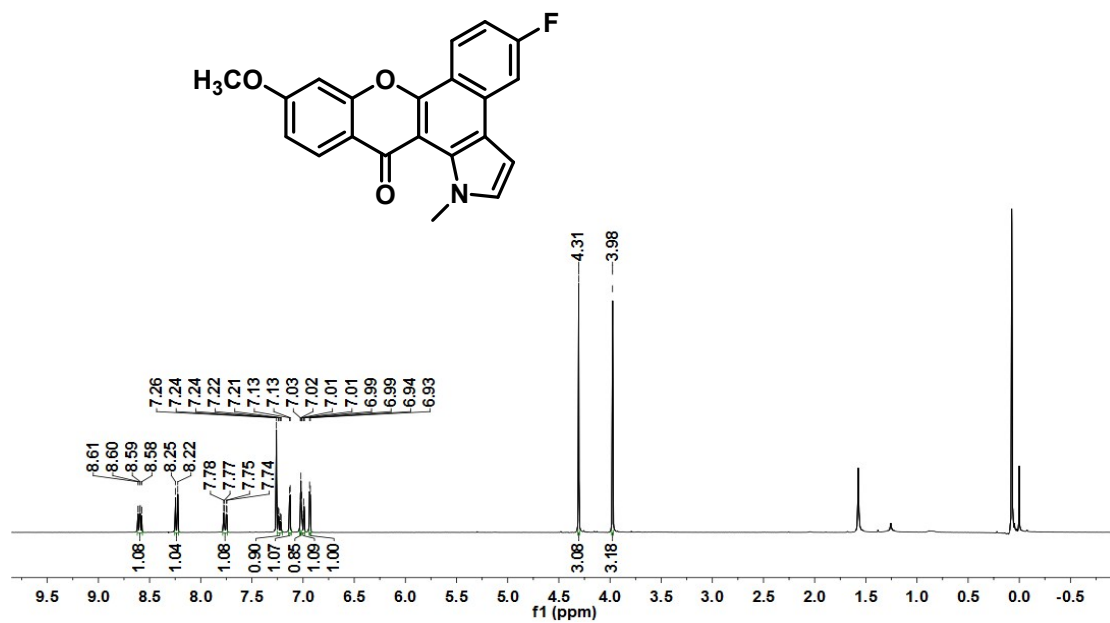

Compound 3o  $^1H$  NMR( $CDCl_3$ )

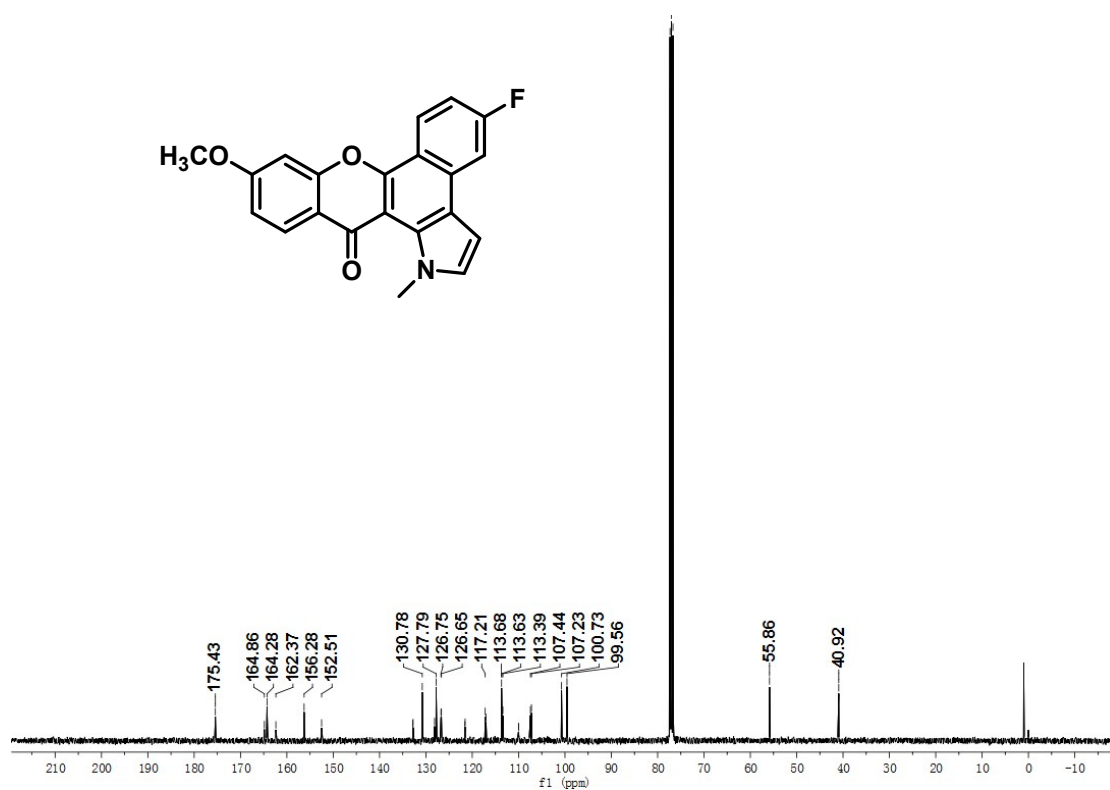

Compound 30  $^{13}\text{C}$  NMR (CDCl<sub>3</sub>)

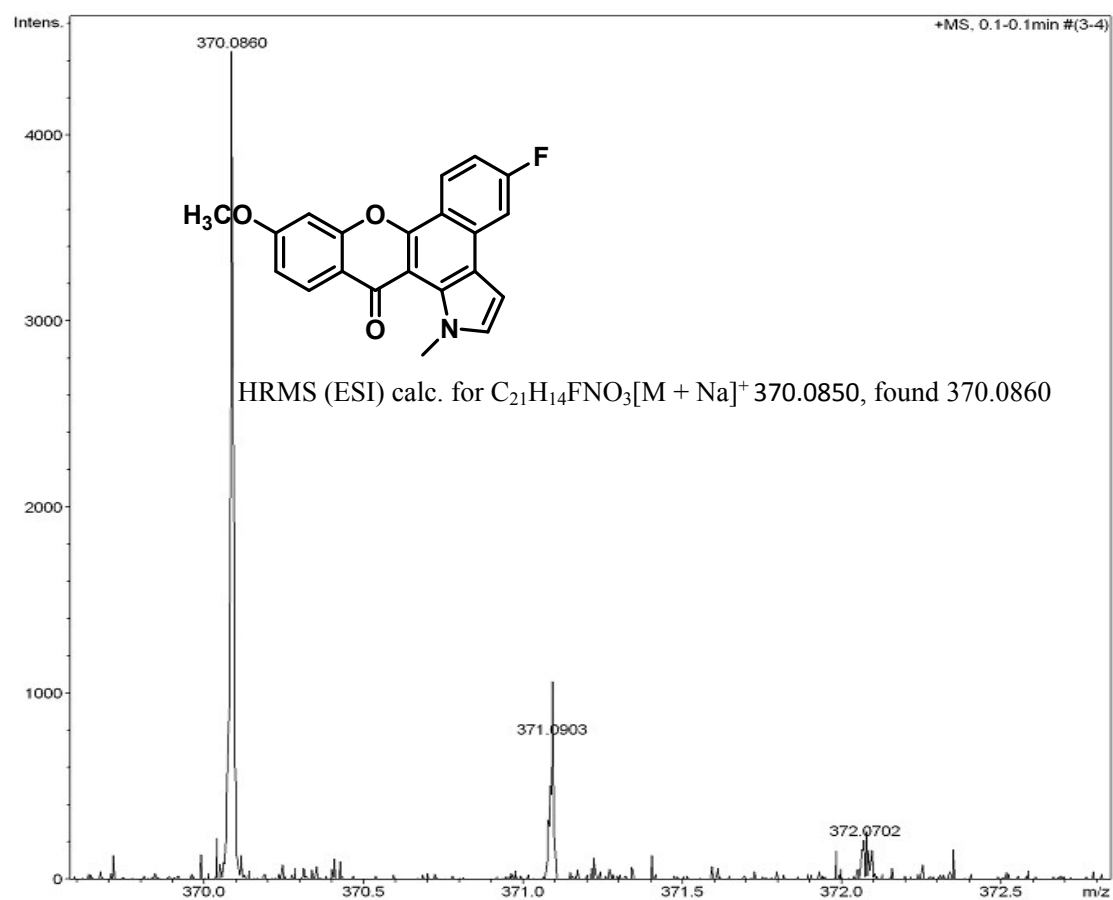

Compound 30 HRMS(MeOH)

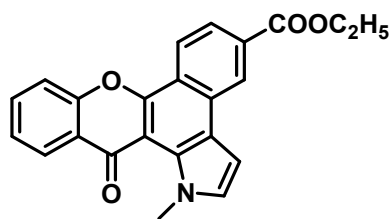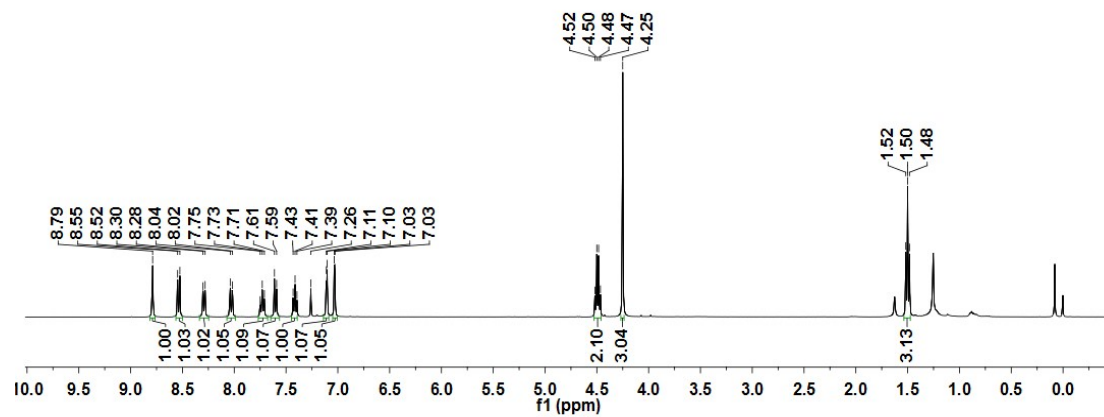

Compound 3p  $^1\text{H NMR}(\text{CDCl}_3)$

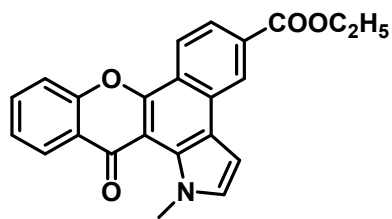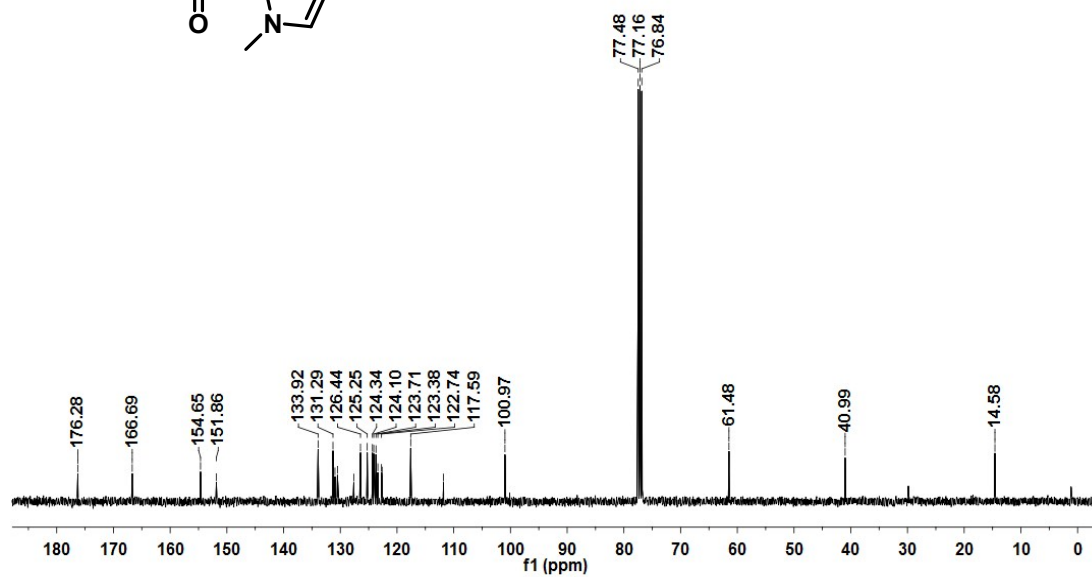

Compound 3p  $^{13}\text{C NMR}(\text{CDCl}_3)$

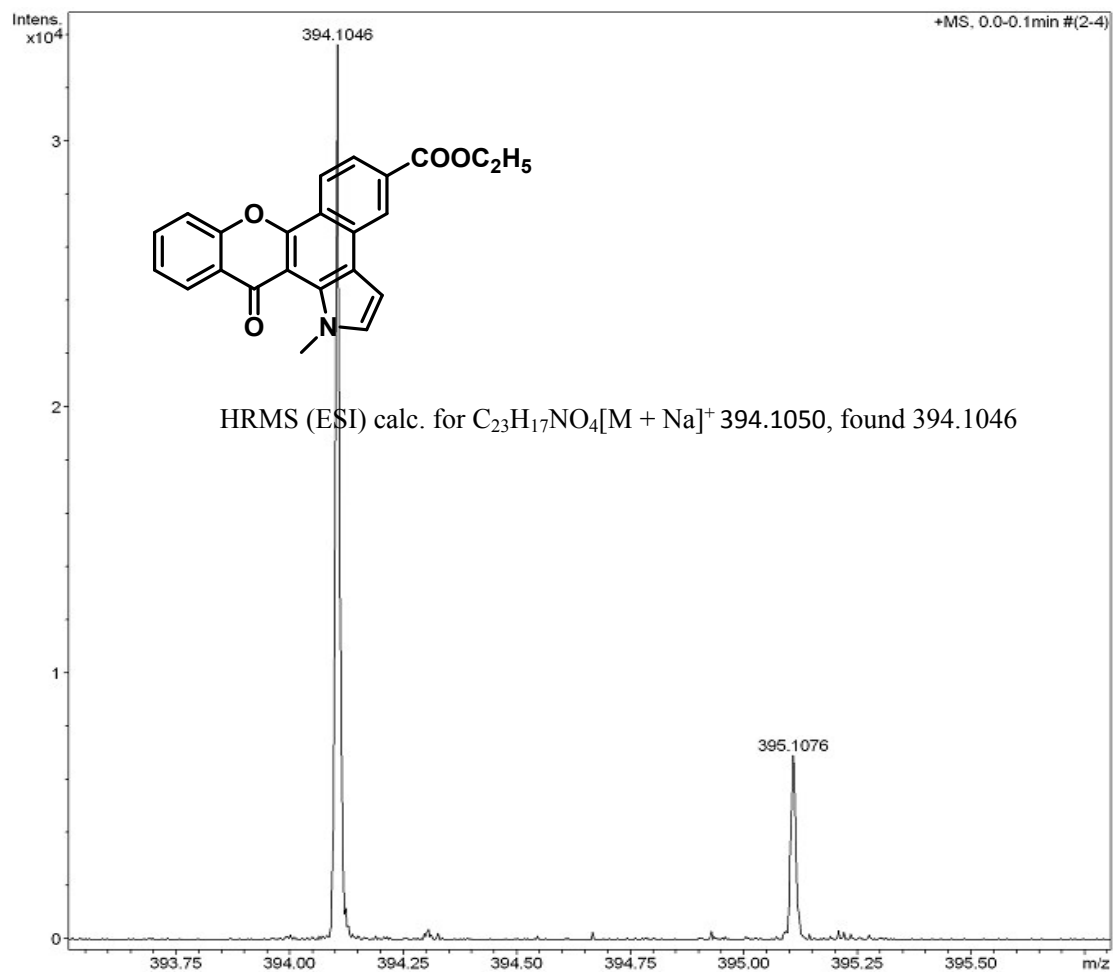

Compound 3p HRMS(MeOH)

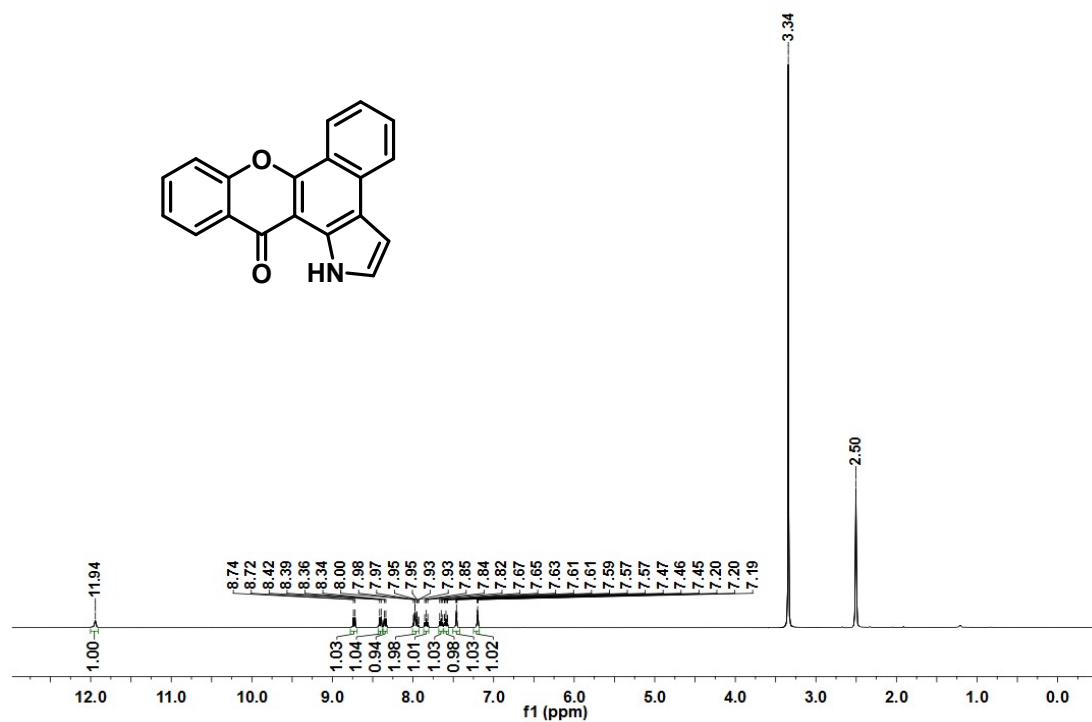

Compound 3q  $^1H$  NMR(DMSO)

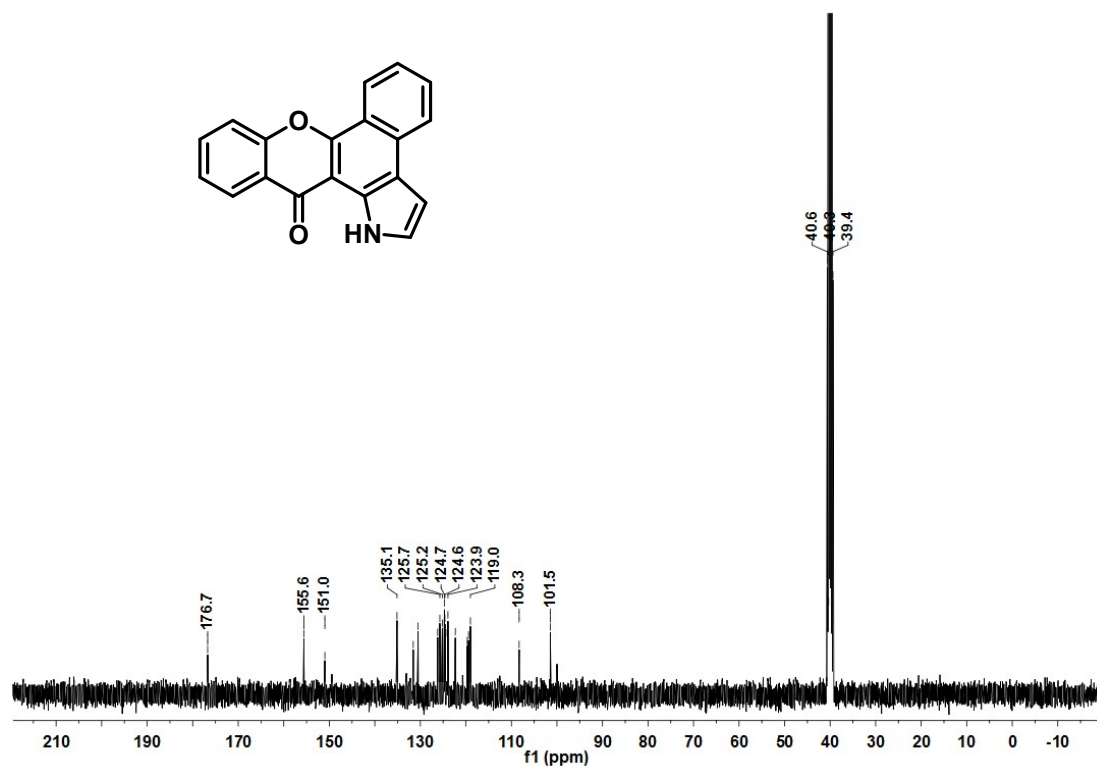

Compound 3q <sup>13</sup>C NMR (DMSO)

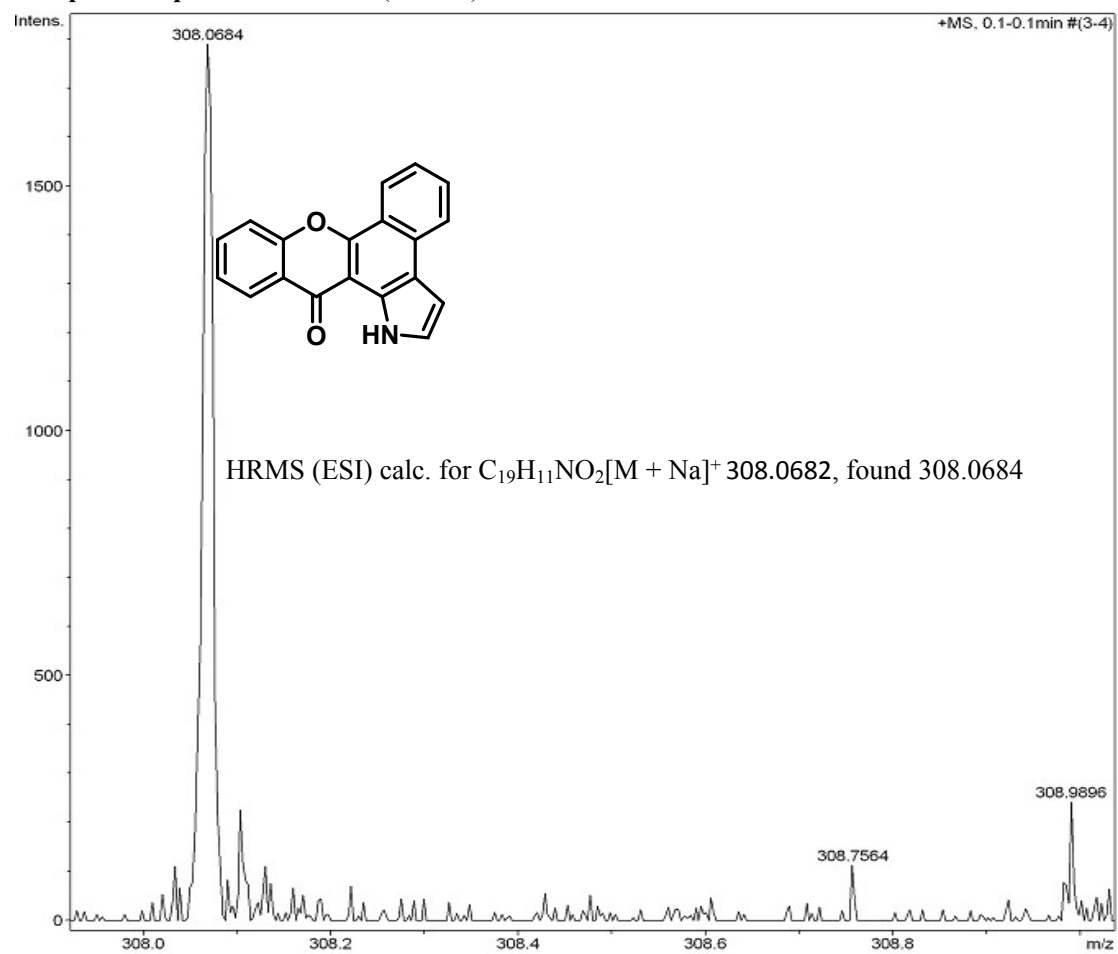

Compound 3q HRMS(MeOH)



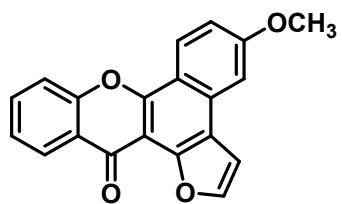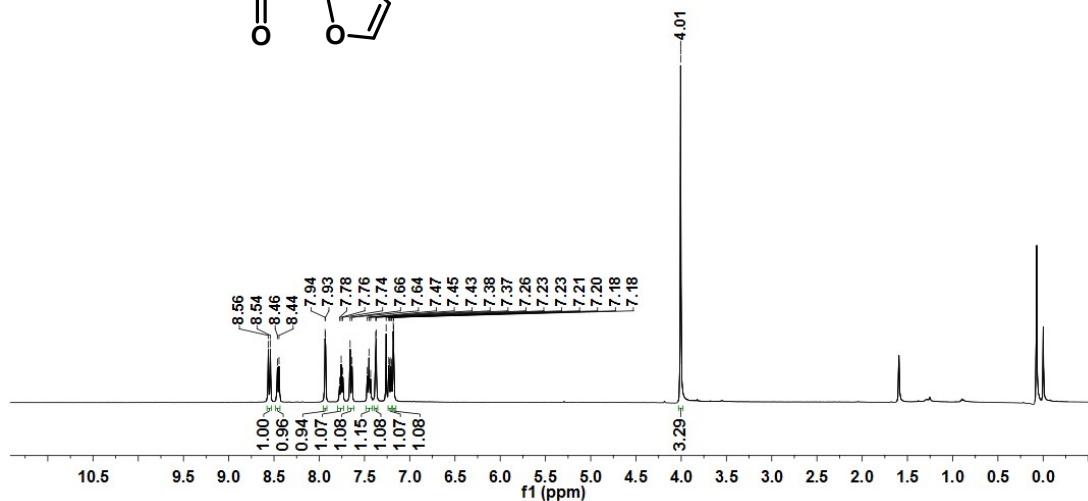

Compound 3r  $^1\text{H NMR}(\text{CDCl}_3)$

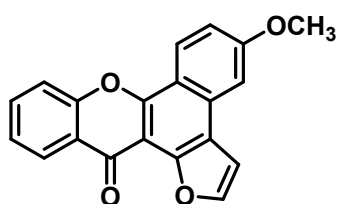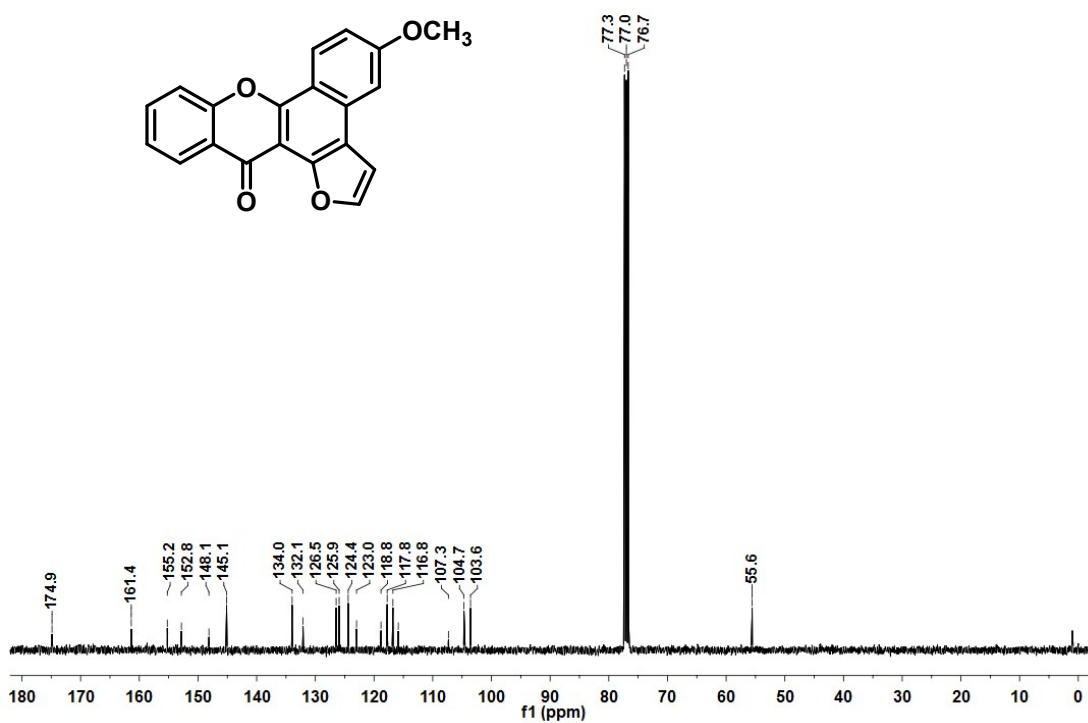

Compound 3r  $^{13}\text{C NMR}(\text{CDCl}_3)$

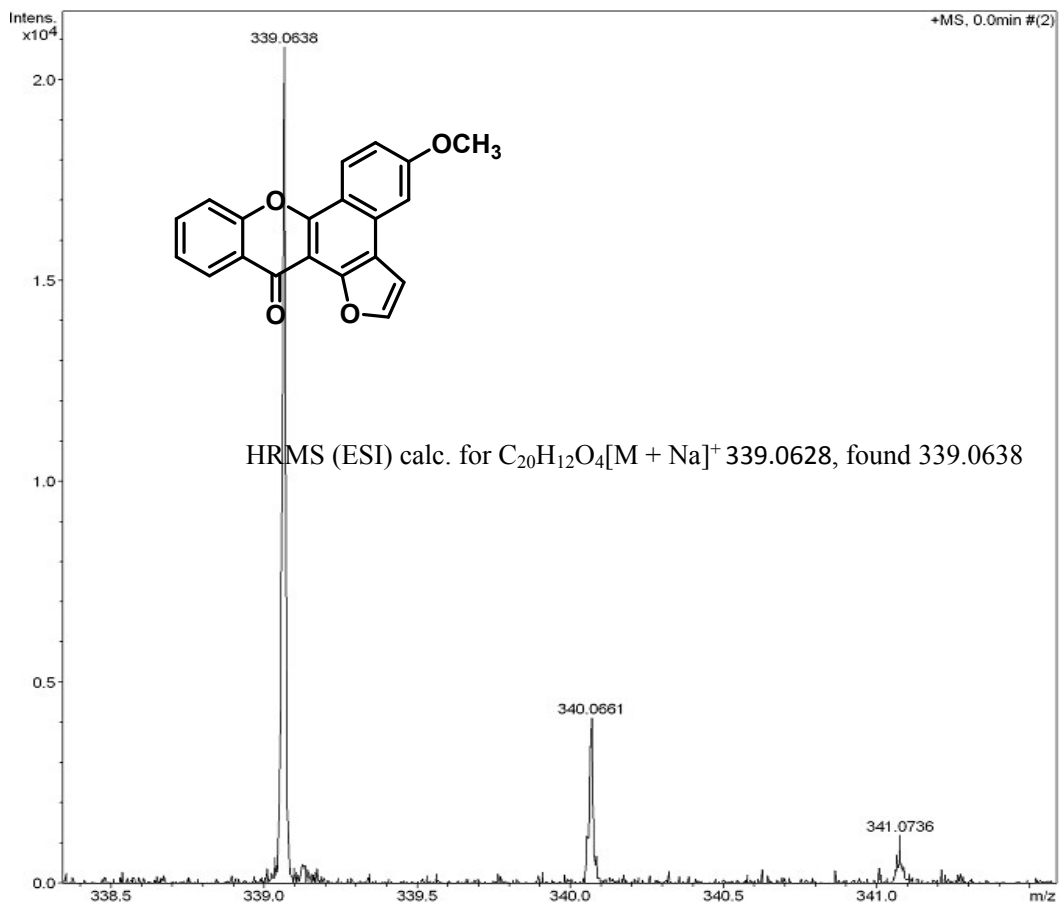

Compound 3r HRMS(MeOH)

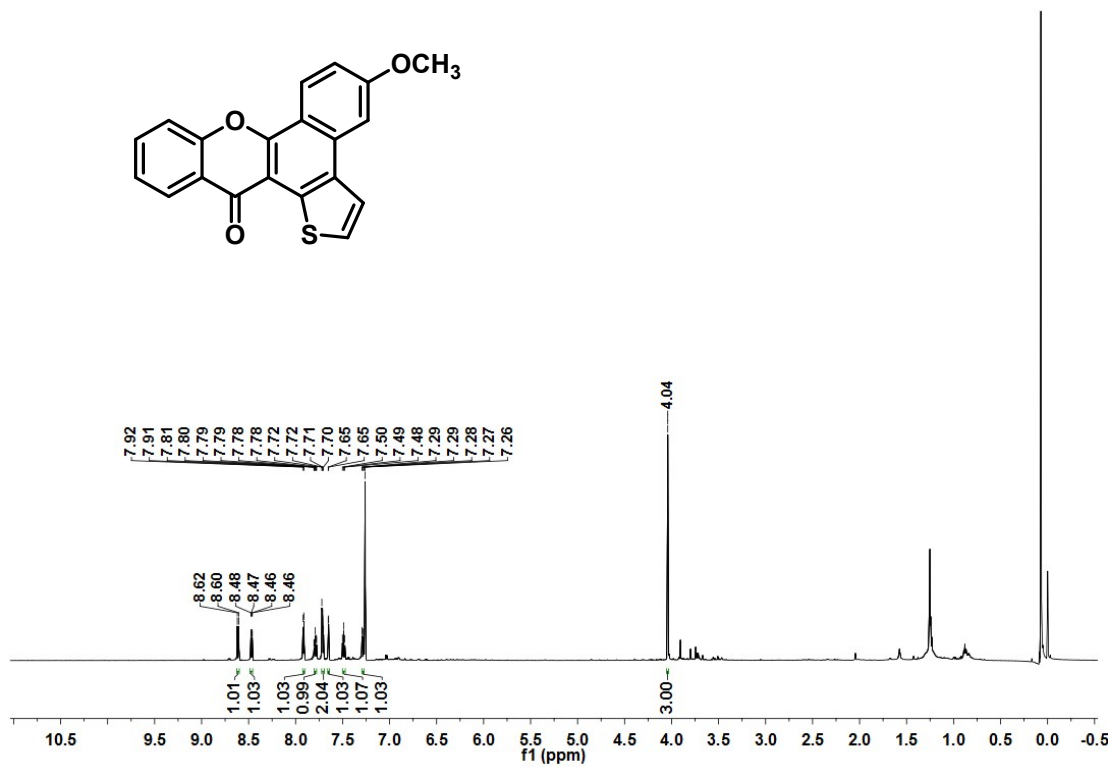

Compound 3s  $^1H$  NMR(CDCl<sub>3</sub>)

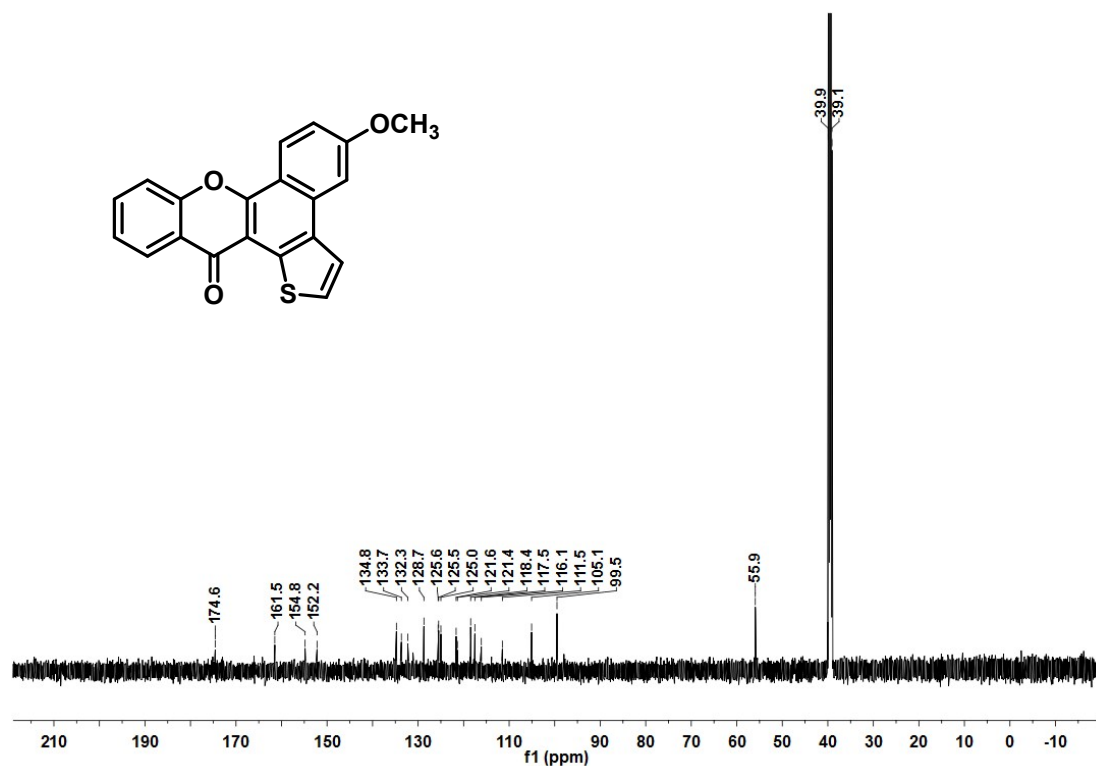

**Compound 3s**

$^{13}\text{C}$  NMR (DMSO)

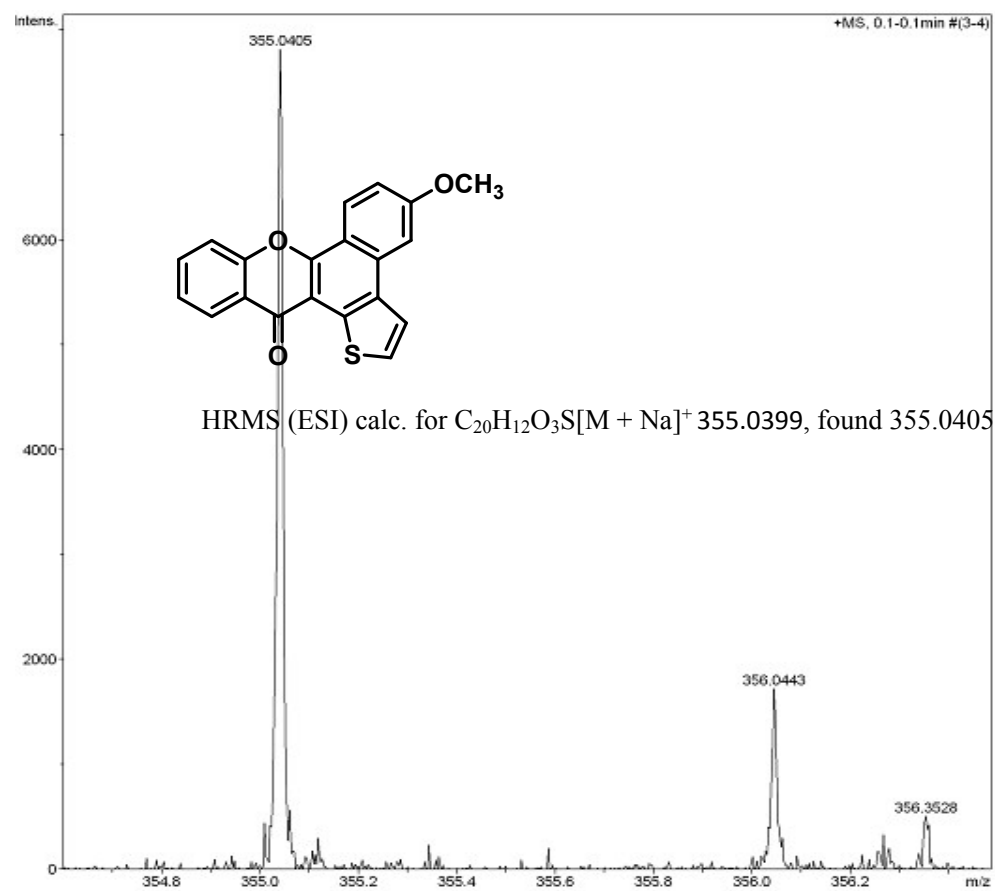

**Compound 3s**

HRMS (MeOH)

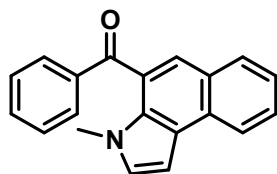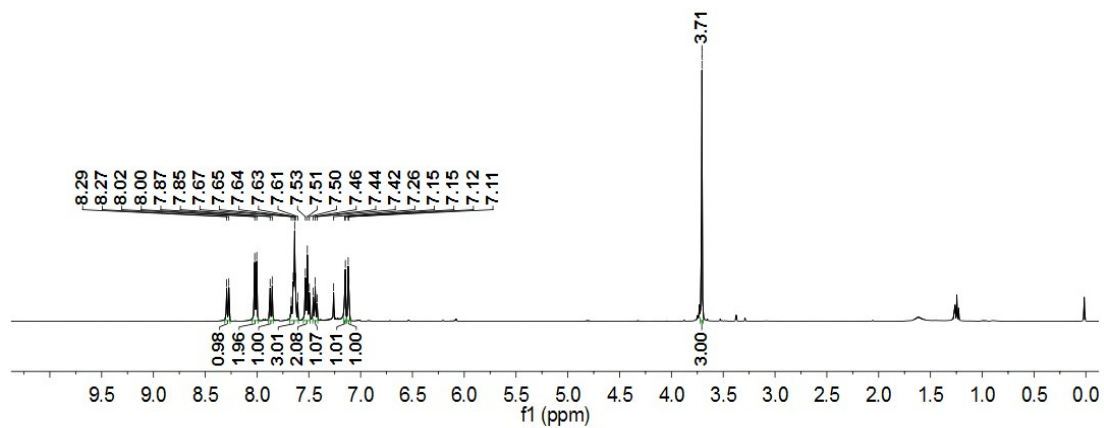

**Compound 5a**  $^1\text{H NMR}(\text{CDCl}_3)$

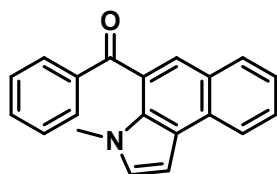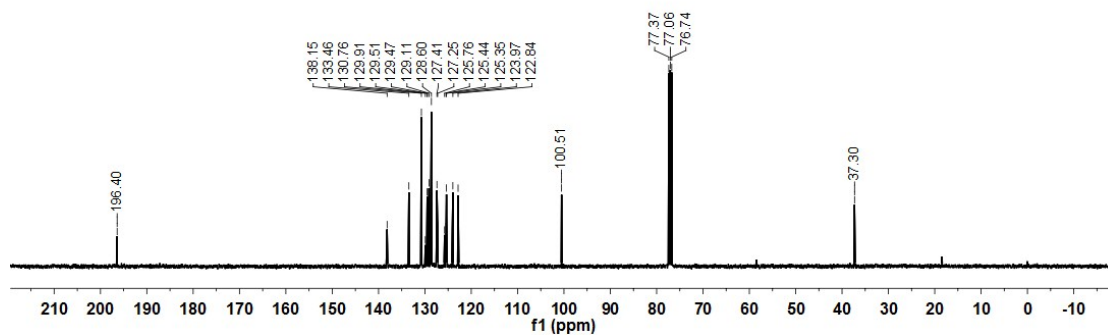

**Compound 5a**  $^{13}\text{C NMR}(\text{CDCl}_3)$

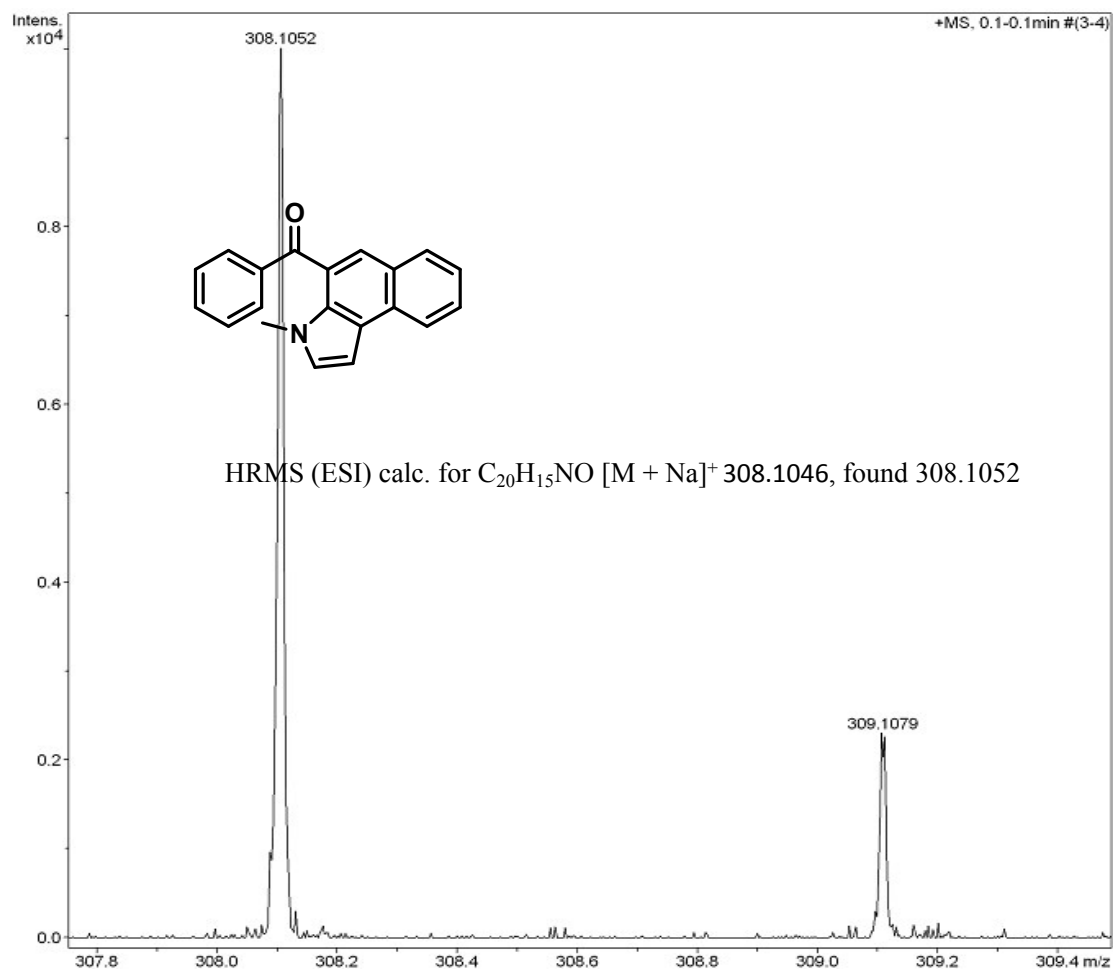

Compound 5a HRMS(MeOH)

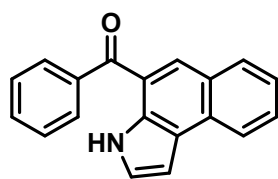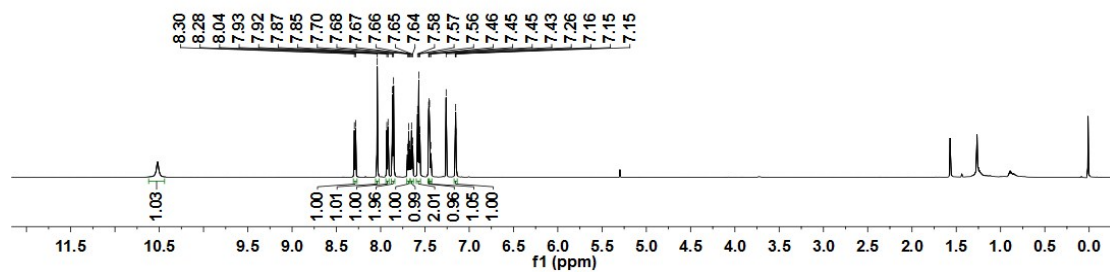

Compound 5b  $^1H$  NMR( $CDCl_3$ )

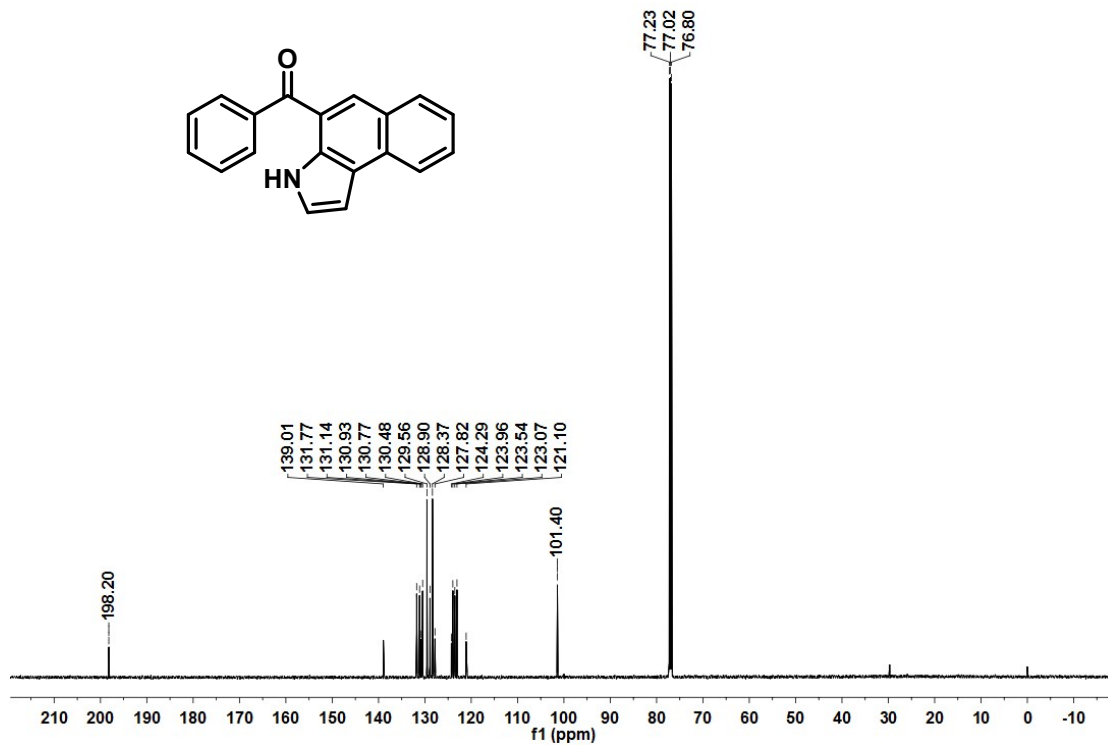

Compound 5b  $^{13}\text{C}$  NMR (CDCl<sub>3</sub>)

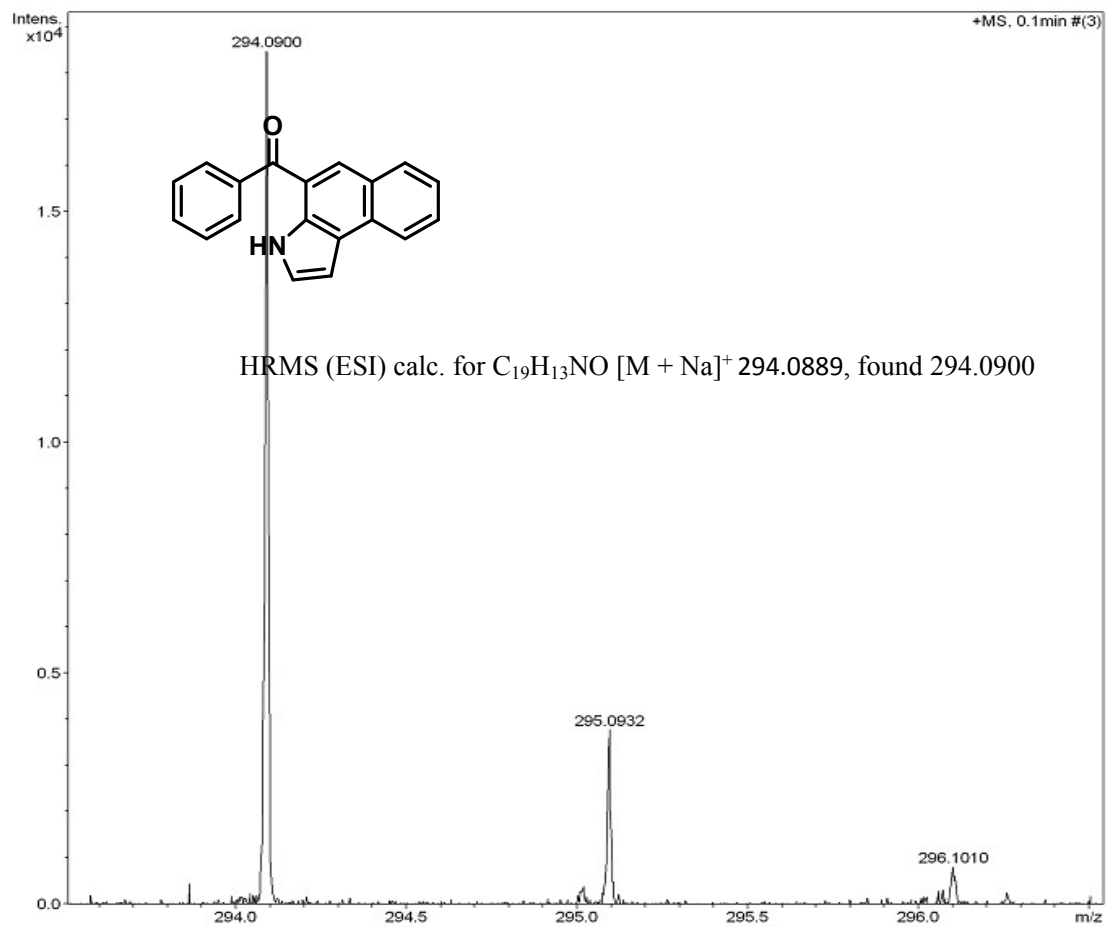

Compound 5b HRMS(MeOH)

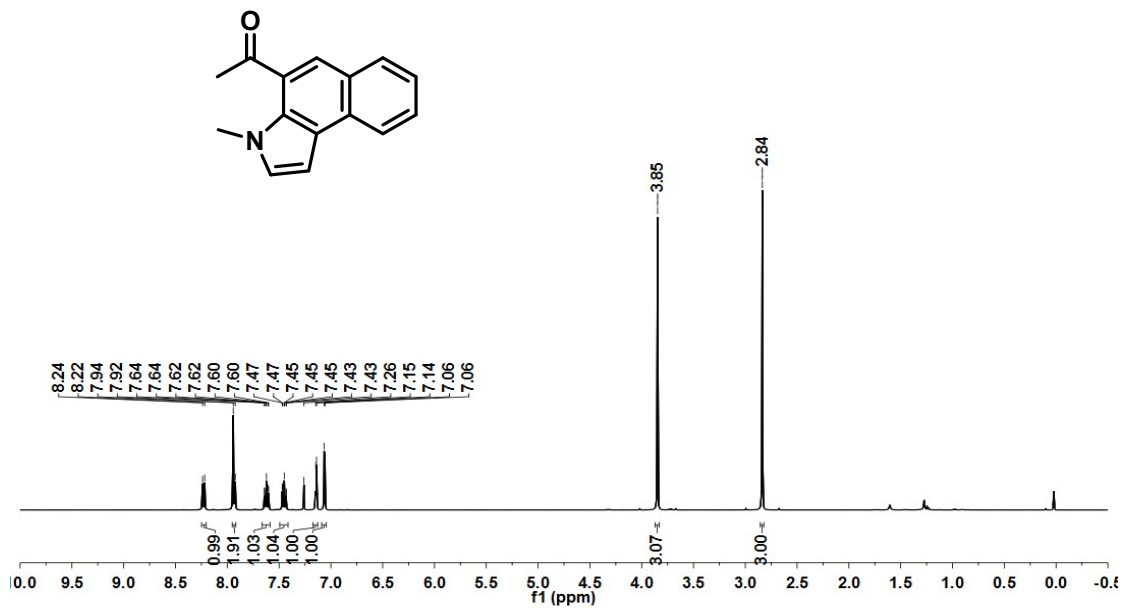

Compound 5c  $^1\text{H NMR}(\text{CDCl}_3)$

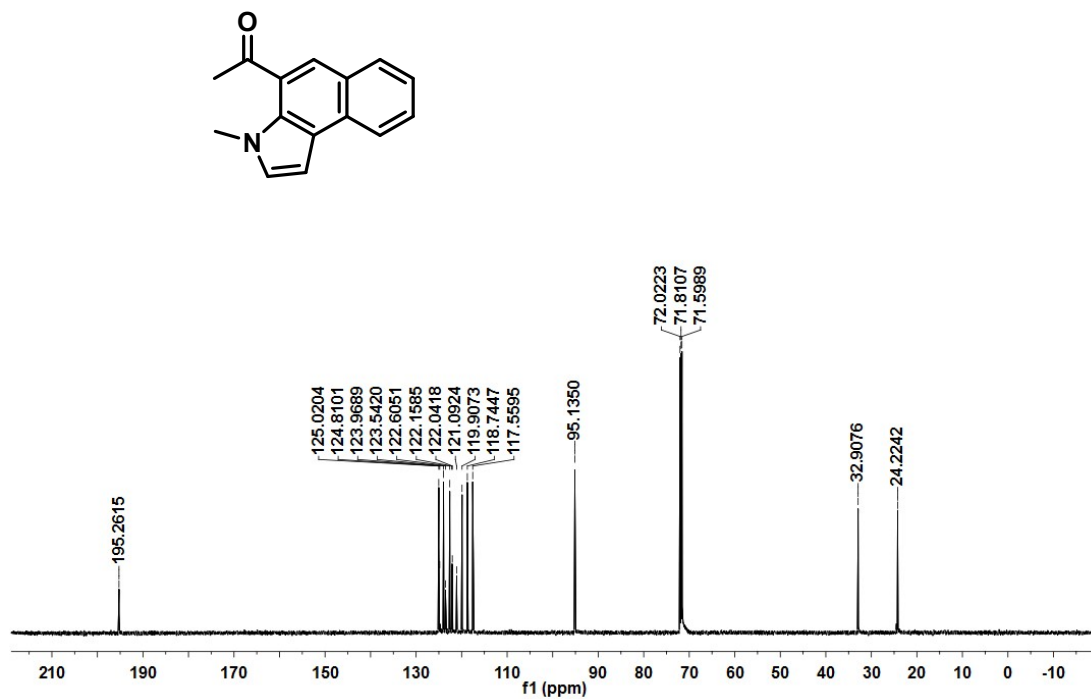

Compound 5c  $^{13}\text{C NMR}(\text{CDCl}_3)$

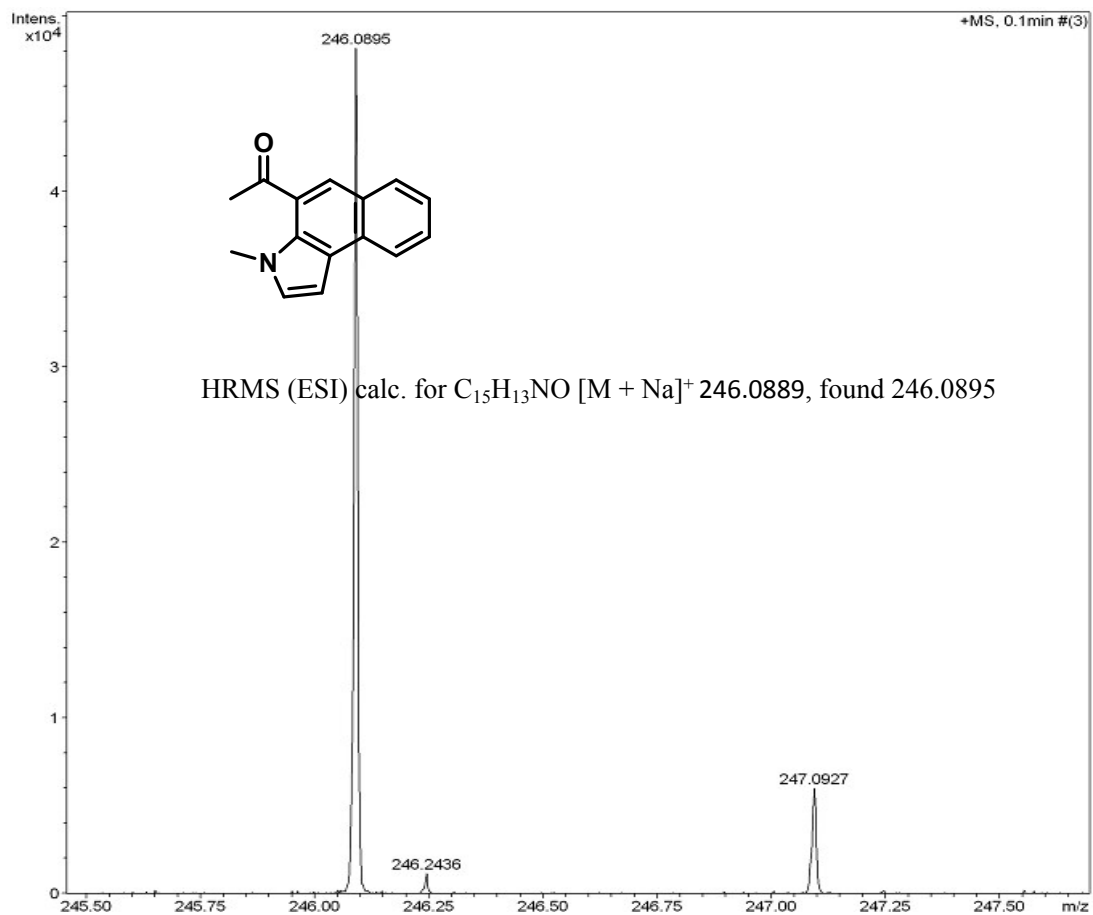

Compound 5c HRMS(MeOH)

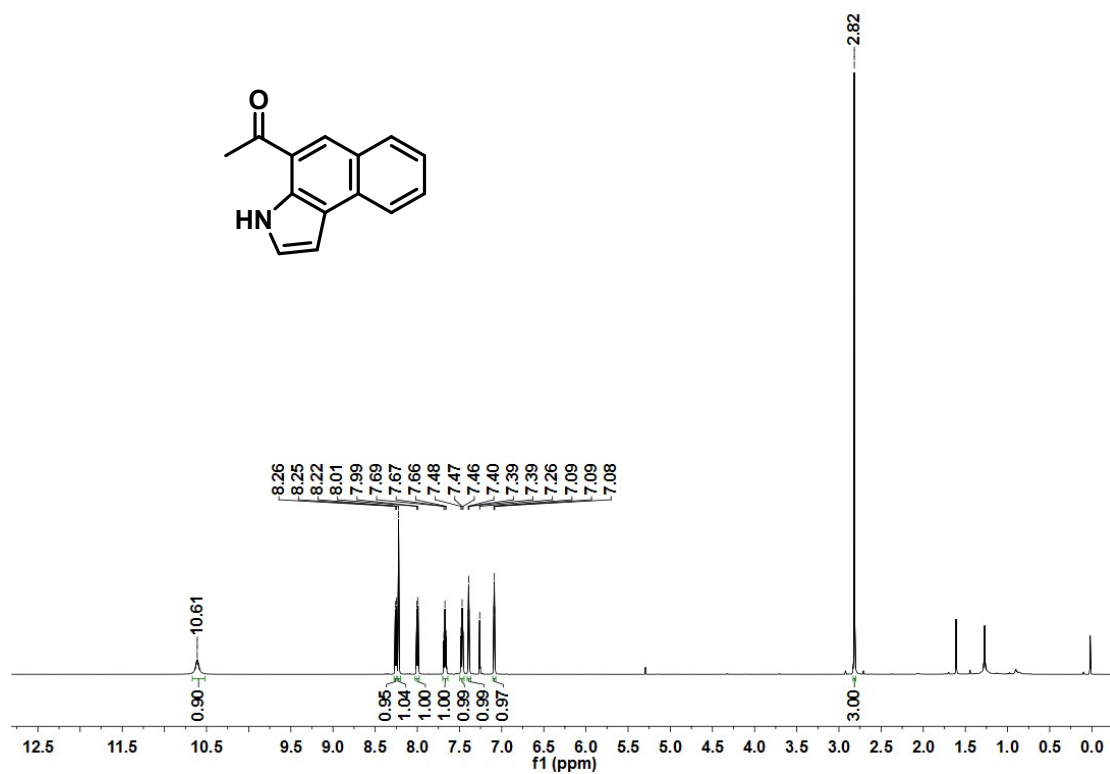

Compound 5d  $^1H$  NMR( $CDCl_3$ )



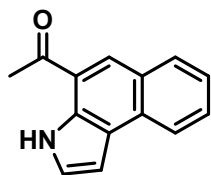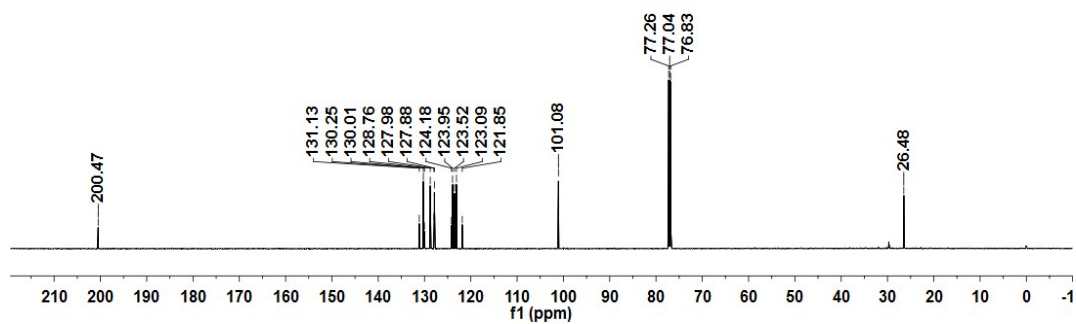

Compound 5d  $^{13}\text{C}$  NMR ( $\text{CDCl}_3$ )

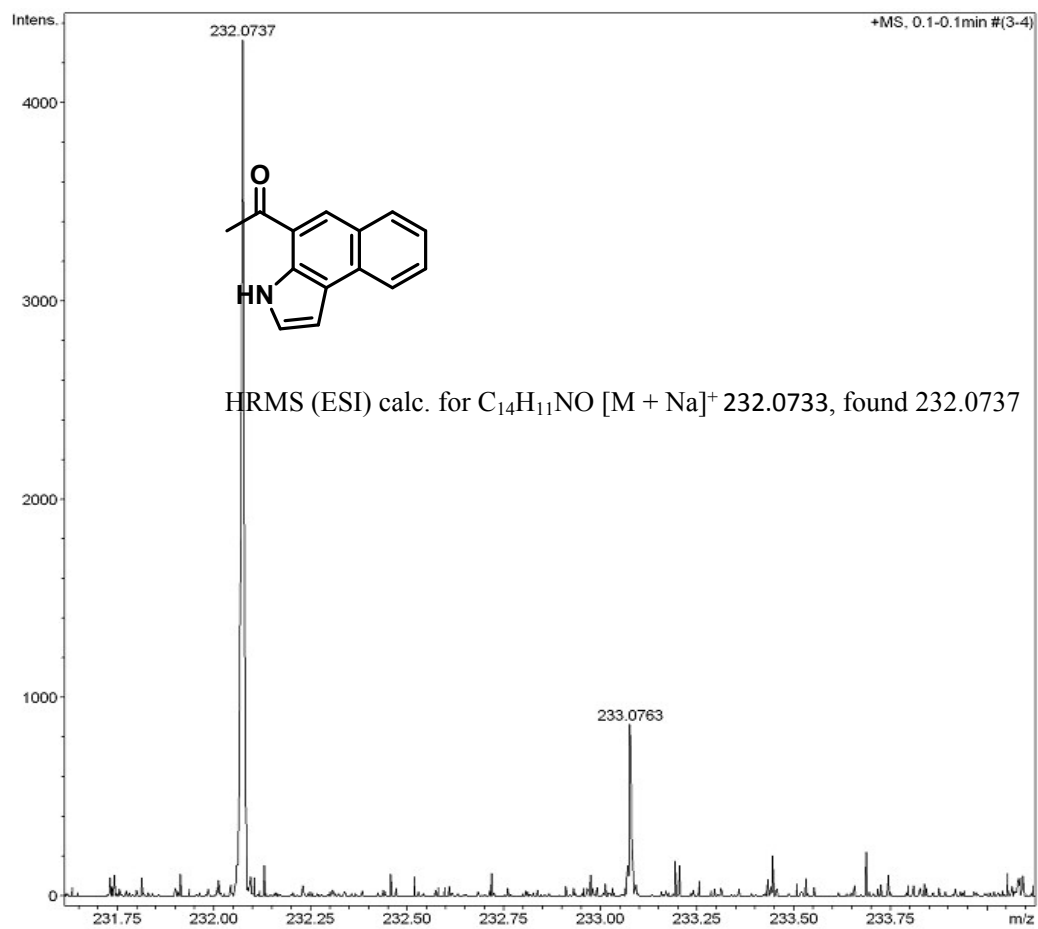

Compound 5d HRMS(MeOH)

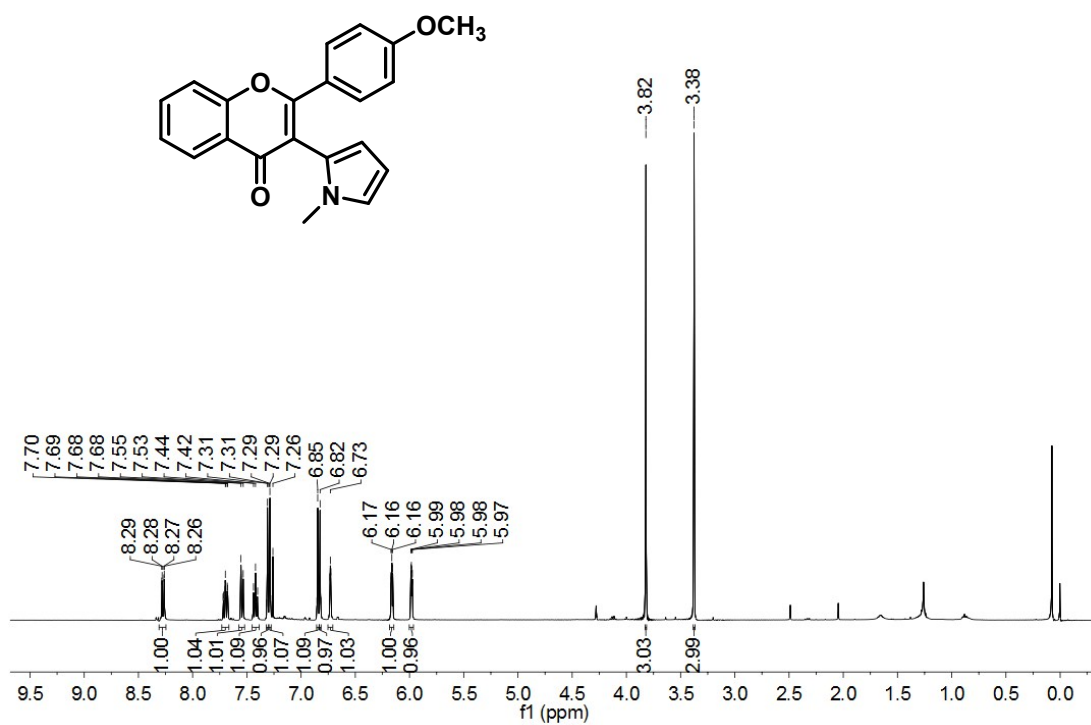

**Compound 1aa**  $^1\text{H NMR}(\text{CDCl}_3)$

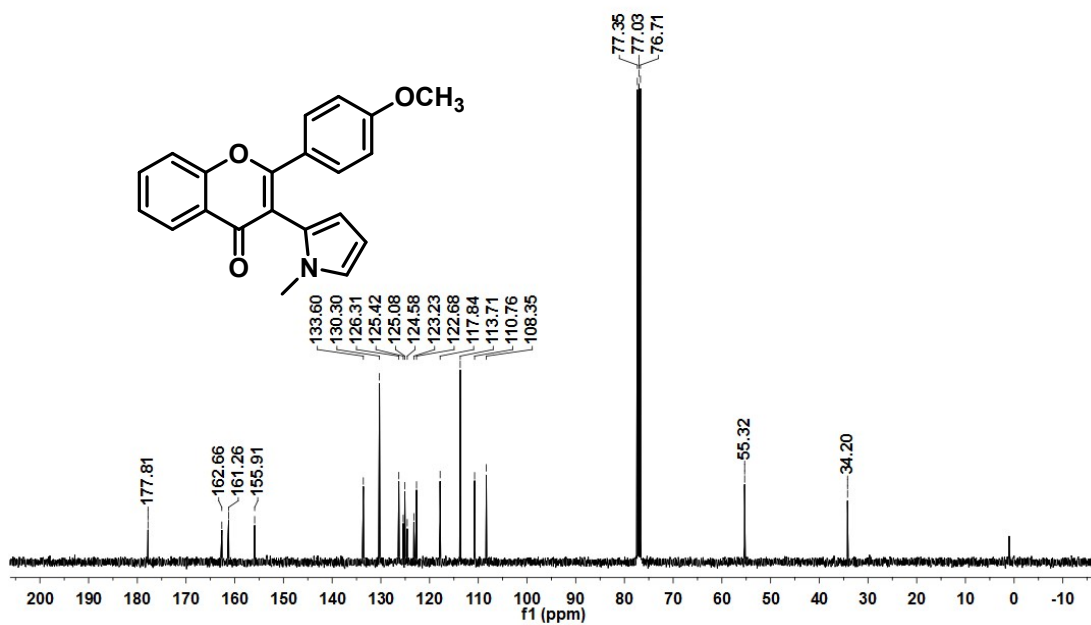

**Compound 1aa**  $^{13}\text{C NMR}(\text{CDCl}_3)$

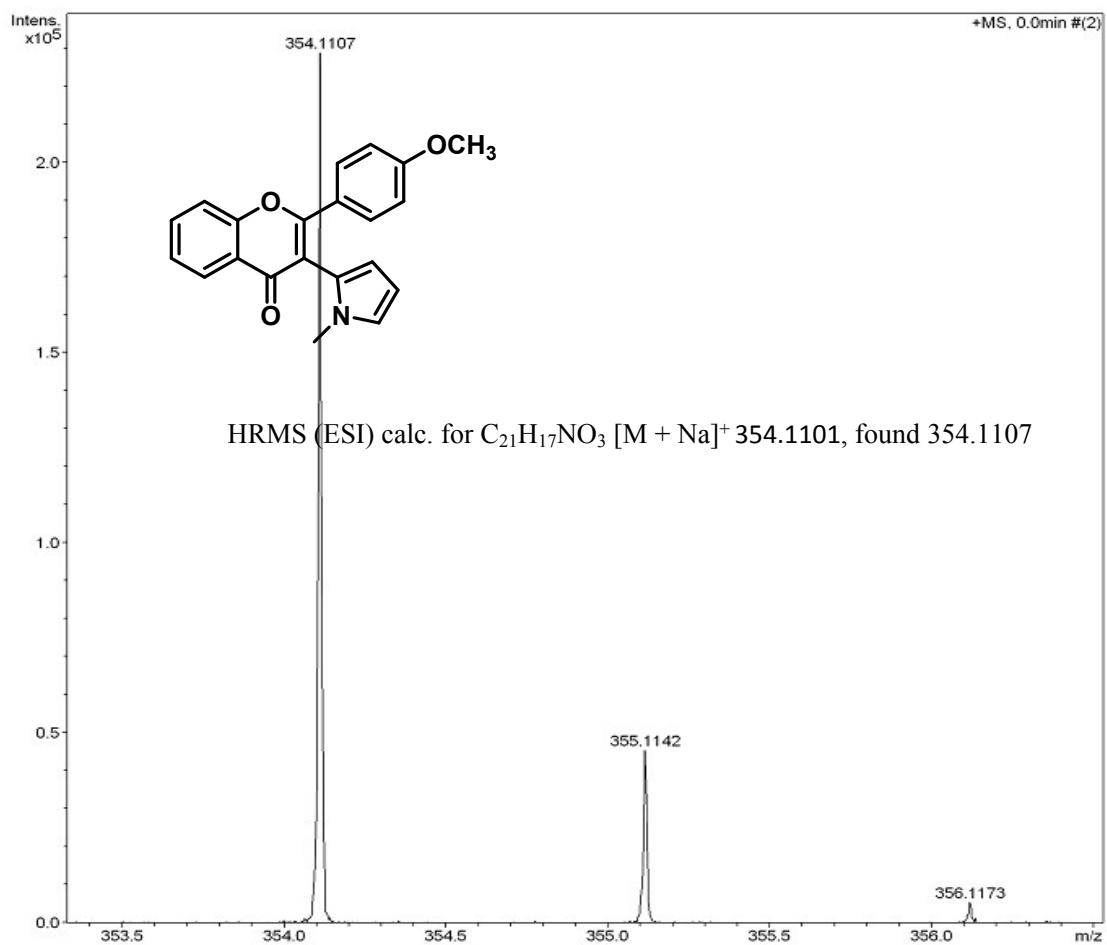

Compound 1aa HRMS(MeOH)

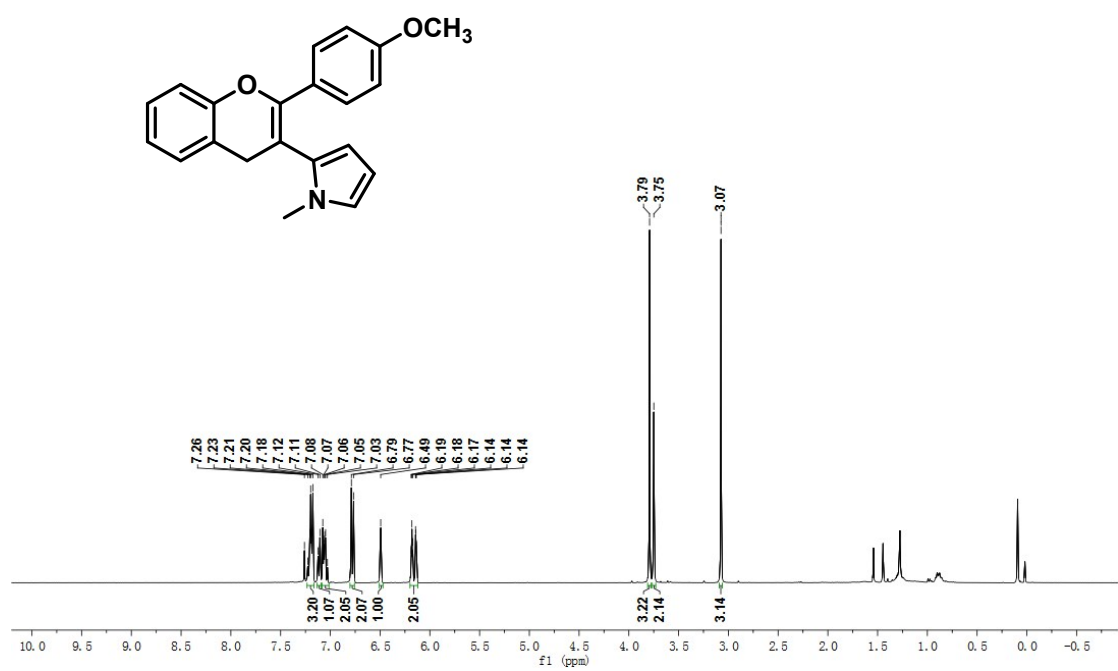

Compound 1ab  $^1H$  NMR(CDCl<sub>3</sub>)

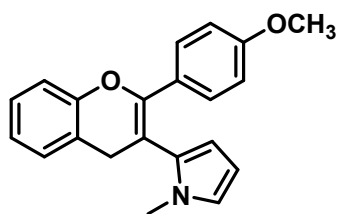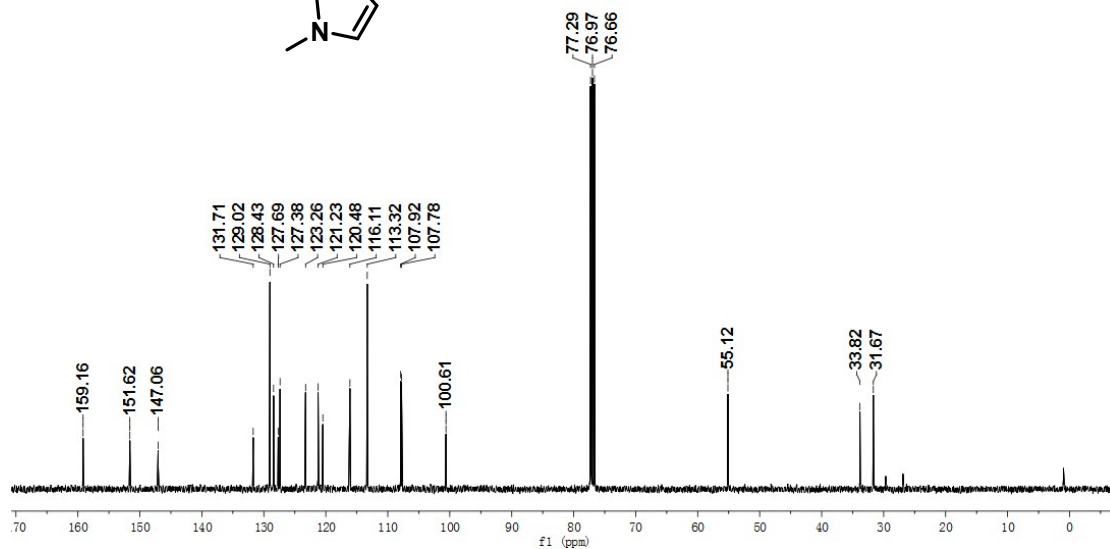

Compound 1ab  $^{13}\text{C}$  NMR ( $\text{CDCl}_3$ )

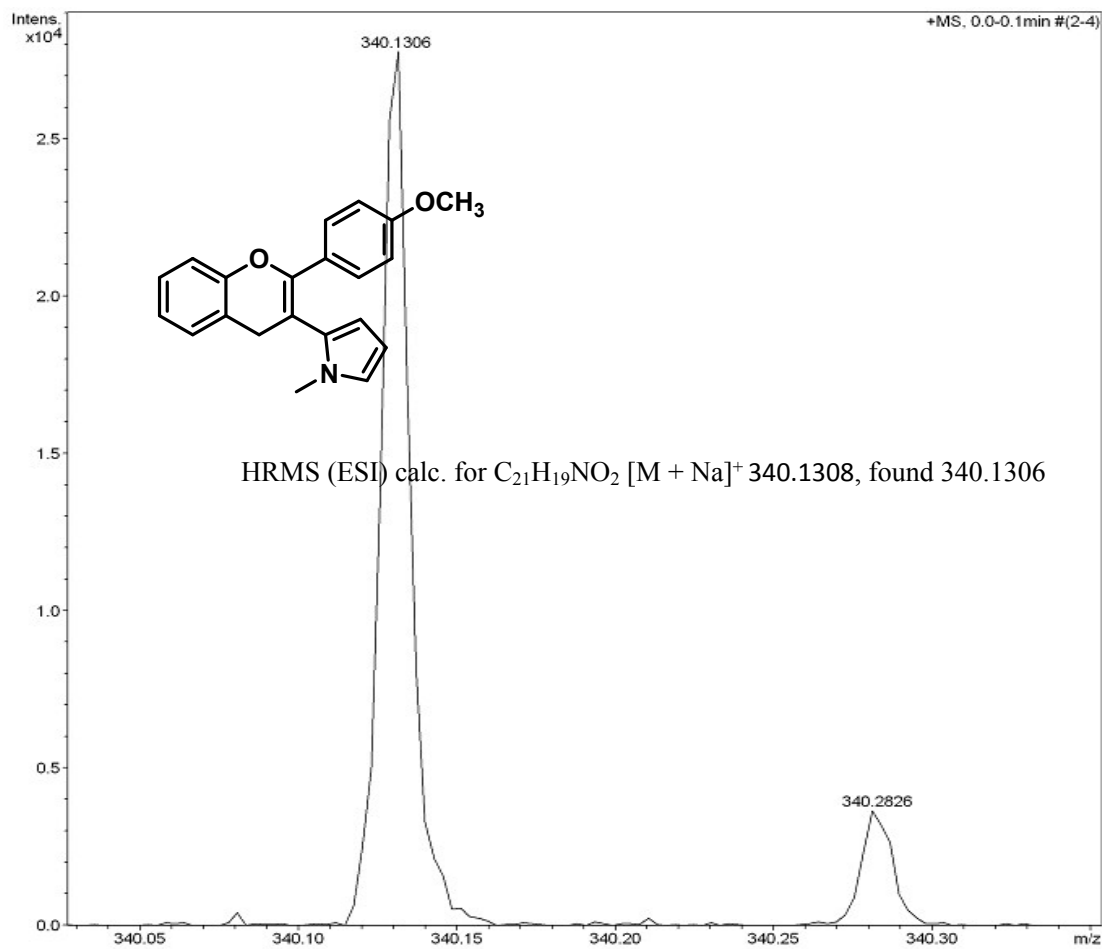

Compound 1ab HRMS(MeOH)
